# Supplementary material
Source: Royal Society of Chemistry journal article supplement (doi:10.1039/d6qi01016d)
Supplement: d6qi01016d1.pdf [file d6qi01016d1.pdf]

Supplementary Information for

# Synthesis and reactivity of *o*-carboranyl- I(OTf)<sub>2</sub> and -I(X)(OTf) reagents: Triflation of C<sub>1</sub> chlorocarbons, arene iodo-*o*-carboranylation, and unsaturation of *n*-alkanes

Marcus Sceney, Harini A. Sivakumar, David J.D. Wilson, and Jason L. Dutton\*

Department of Biochemistry and Chemistry, La Trobe Institute for Molecular Science, La Trobe  
University, Melbourne, Victoria, Australia, 3086

[j.dutton@latrobe.edu.au](mailto:j.dutton@latrobe.edu.au)

## Table of Contents

|                                                                                                                                              |      |
|----------------------------------------------------------------------------------------------------------------------------------------------|------|
| NMR Quick Reference Tables.....                                                                                                              | S2   |
| Experimental.....                                                                                                                            | S3   |
| General.....                                                                                                                                 | S3   |
| Synthetic Methods.....                                                                                                                       | S3   |
| <i>TfO-CCl<sub>3</sub> solution in CCl<sub>4</sub></i> .....                                                                                 | S3   |
| <i>Si(OTf)<sub>4</sub></i> .....                                                                                                             | S4   |
| <i>Cl<sub>4</sub>MeoCb</i> .....                                                                                                             | S5   |
| <i>Cl<sub>4</sub>MeoCbl (improved procedure)</i> .....                                                                                       | S6   |
| <i>Cl<sub>4</sub>MeoCb-IF<sub>2</sub> (improved procedure)</i> .....                                                                         | S7   |
| <i>Cl<sub>4</sub>MeoCb-I(F)(OTf)</i> .....                                                                                                   | S7   |
| <i>Cl<sub>4</sub>MeoCb-I(OTf)<sub>2</sub></i> .....                                                                                          | S8   |
| <i>[4-(Cl<sub>4</sub>MeoCbl)PhBr][OTf]</i> .....                                                                                             | S9   |
| Exploratory Reactions.....                                                                                                                   | S11  |
| <i>Cl<sub>4</sub>MeoCb-I(OTf)<sub>2</sub> with C<sub>1</sub> halocarbons to form triflate esters</i> .....                                   | S11  |
| <i>Cl<sub>4</sub>MeoCb-I(OTf)<sub>2</sub> with CDCl<sub>3</sub> in glass vs PTFE; Observation of Cl<sub>4</sub>MeoCb-I(Cl)(OTf)</i> .....    | S13  |
| <i>Glassware/solvent H<sub>2</sub>O quantification with Tf<sub>2</sub>O</i> .....                                                            | S14  |
| <i>Cl<sub>2</sub> detection in the reaction of Cl<sub>4</sub>MeoCb-I(OTf)<sub>2</sub> with CDCl<sub>3</sub> using Ph<sub>3</sub>Sb</i> ..... | S14  |
| <i>Attempted syntheses of Cl<sub>4</sub>MeoCb-I(Cl)(OTf)</i> .....                                                                           | S15  |
| <i>Interception of Cl<sub>4</sub>MeoCb-I(Cl)(OTf) with BrPh as a chlorination probe</i> .....                                                | S18  |
| <i>[4-(Cl<sub>4</sub>MeoCbl)PhBr][OTf] with [NBu<sub>4</sub>]Cl as a nucleophilic chlorination control</i> .....                             | S18  |
| <i>Attempted syntheses of Cl<sub>4</sub>MeoCb-I(Cl)(F) and Cl<sub>4</sub>MeoCb-ICl<sub>2</sub></i> .....                                     | S19  |
| <i>Cl<sub>4</sub>MeoCb-I(OTf)<sub>2</sub> with alkanes</i> .....                                                                             | S19  |
| NMR Spectra.....                                                                                                                             | S22  |
| Mass Spectra.....                                                                                                                            | S87  |
| Computational Details.....                                                                                                                   | S88  |
| References.....                                                                                                                              | S100 |

## NMR Quick Reference Tables

**Table S 1.** NMR ( $^1\text{H}$ ,  $^{13}\text{C}\{^1\text{H}\}$ ,  $^{19}\text{F}$ ) data for triflate esters in  $\text{CDCl}_3$  and  $\text{CD}_2\text{Cl}_2$ .

| $\text{X}$                  | Cl, H, D | $\delta_{\text{H}}$ |                          | $\delta_{\text{CX}}$ (mult, $J_{\text{Hz}}$ ) |                          | $\delta_{\text{CF}}$ |                          | $\delta_{\text{CF}}$ (mult, $J_{\text{Hz}}$ ) |                          |
|-----------------------------|----------|---------------------|--------------------------|-----------------------------------------------|--------------------------|----------------------|--------------------------|-----------------------------------------------|--------------------------|
|                             |          | $\text{CDCl}_3$     | $\text{CD}_2\text{Cl}_2$ | $\text{CDCl}_3$                               | $\text{CD}_2\text{Cl}_2$ | $\text{CDCl}_3$      | $\text{CD}_2\text{Cl}_2$ | $\text{CDCl}_3$                               | $\text{CD}_2\text{Cl}_2$ |
| TfO- $\text{CCl}_3$         | -        | -                   | -                        | 109.0 <sup>a</sup>                            | 109.4                    | -73.18 <sup>a</sup>  | -73.46                   | 118.1 (q, 321) <sup>a</sup>                   | 118.3 (q, 322)           |
| TfO- $\text{CDCl}_2$        | -        | -                   | -                        | 94.5 (t, 32)                                  | *                        | -73.71               | -74.07                   | 118.3 (q, 321)                                | *                        |
| TfO- $\text{CHCl}_2$        | 7.59     | 7.65                | -                        | 94.7                                          | 95.3                     | -73.73               | -74.08                   | 118.3 (q, 321)                                | *                        |
| TfO- $\text{CD}_2\text{Cl}$ | -        | -                   | -                        | *                                             | 77.7 (p, 28)             | -74.42 <sup>b</sup>  | -74.89                   | *                                             | 118.6 (q, 320)           |
| TfO- $\text{CH}_2\text{Cl}$ | *        | 5.97                | -                        | *                                             | 78.1                     | *                    | -74.86                   | *                                             | 118.6 (q, 320)           |

Shifts ( $\delta$ ) are given in ppm. <sup>a</sup>Solvent 10-20 v%  $\text{CCl}_4$ . <sup>b</sup>Solvent 10-20 v%  $\text{CD}_2\text{Cl}_2$ . Multiplicity: t = triplet, q = quartet, p = quintet. \*Not obtained.

**Table S 2.** NMR ( $^1\text{H}$ ,  $^{13}\text{C}\{^1\text{H}\}$ ,  $^{11}\text{B}$ ,  $^{19}\text{F}$ ) data for relevant **1**(III) compounds in  $\text{CDCl}_3$  or  $^a\text{CD}_2\text{Cl}_2$ .

| $\text{C}^+\text{H}_3$                          | $\delta_{\text{CH}}$ | o-Carborane nuclei                                                     |                            |  | Ligand (L) nuclei      |                        |                                                 |
|-------------------------------------------------|----------------------|------------------------------------------------------------------------|----------------------------|--|------------------------|------------------------|-------------------------------------------------|
|                                                 |                      | $\delta_{\text{C}1,2,3}$ (mult, $J_{\text{Hz}}$ )                      | $\delta_{\text{BCl}a,b,c}$ |  | $^L\delta_{\text{IF}}$ | $^L\delta_{\text{CF}}$ | $^L\delta_{\text{CF}}$ (mult, $J_{\text{Hz}}$ ) |
| <b>1</b>                                        | 2.25                 | <b>-1.30</b> , 58.8, 26.5                                              | <b>6.44</b> , 4.00, 0.20   |  | -                      | -                      | -                                               |
| <b>1</b> F <sub>2</sub>                         | 2.39                 | <sup>a</sup> <b>51.3</b> (t, 20), <sup>a</sup> 62.3, <sup>a</sup> 25.9 | <b>8.32</b> , 4.45, -0.22  |  | -132.92                | -                      | -                                               |
| <b>1</b> (Cl)(OTf)                              | 2.37                 | <b>41.0</b> , 61.7, 25.7                                               | <b>9.08</b> , 4.82, 0.38   |  | -                      | -76.15                 | 118.3 (q, 321)                                  |
| <b>1</b> (F)(OTf)                               | 2.42                 | <b>52.3</b> (d, 30), 61.4, 25.9                                        | <b>9.20</b> , 4.94, 0.16   |  | -147.35                | -75.69                 | 118.6 (q, 319)                                  |
| [ <b>1</b> (F)(OTf) <sub>2</sub> ] <sup>-</sup> | 2.34                 | *                                                                      | *                          |  | -162.92                | -76.47, -77.85         | *                                               |
| <b>1</b> (OTf) <sub>2</sub>                     | 2.46                 | <b>54.0</b> , 62.0, 26.0                                               | <b>9.64</b> , 5.24, 0.45   |  | -                      | -74.34                 | 118.3 (q, 321)                                  |
| [ <b>1</b> (OTf) <sub>3</sub> ] <sup>-</sup>    | 2.39                 | <b>52.5</b> , 62.2, 25.6                                               | *                          |  | -                      | -74.26, -77.84         | 118.7 (p, 320)                                  |
| [4-( <b>1</b> )PhBr] <sup>+</sup>               | 2.40                 | <b>32.8</b> , 59.8, 25.4                                               | <b>8.66</b> , 4.35, 0.74   |  | -                      | -                      | -                                               |

Shifts ( $\delta$ ) are given in ppm. BH environments (often poorly resolved) are omitted. Multiplicity: d = doublet, t = triplet, q = quartet, p = quintet. \*Not obtained. Bold environments are those most affected by I(I)→(III) oxidation ( $\Delta\delta$ ).

## Experimental

### General

NMR spectra were obtained using a 400 or 500 MHz instrument, where the latter was equipped with a cryoprobe.  $^1\text{H}$ ,  $^{13}\text{C}\{^1\text{H}\}$  and  $^{29}\text{Si}\{^1\text{H}\}$  NMR are referenced to tetramethylsilane and  $^1\text{H}/^{13}\text{C}\{^1\text{H}\}$  are calibrated using solvent residuals, while  $^{29}\text{Si}\{^1\text{H}\}$  spectra are not internally calibrated. All shifts are reported in units of ppm.  $^{19}\text{F}$  NMR spectra are referenced to  $\text{CFCl}_3$ , with hexafluorobenzene ( $\text{C}_6\text{F}_6$ ) included in the solvent of applicable samples for calibration ( $\text{C}_6\text{F}_6$ :  $\delta$   $-161.64$  ppm in  $\text{CDCl}_3$ ,  $-162.61$  in  $\text{CD}_2\text{Cl}_2$ ,  $-164.38$  in  $\text{CD}_3\text{CN}$ , and  $-162.45$  in  $\text{DMSO-d}_6$ ).<sup>[1]</sup>  $^{11}\text{B}$  NMR are referenced to  $\text{BF}_3\cdot\text{OEt}_2$  and are not internally calibrated. 1-methyl-o-carborane was obtained commercially from Zhengzhou Yuanli Biological Technology Co., Ltd. Air sensitive reactions were performed in a glovebox under an atmosphere of dry  $\text{N}_2$ . Solids used in air/moisture sensitive reactions were first dried under high vacuum with heat where possible, and solvents were cold distilled under reduced pressure from calcium hydride and stored over 3 Å molecular sieves.

### Synthetic Methods

#### *TfO-CCl<sub>3</sub> solution in CCl<sub>4</sub>*

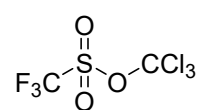

By the method of Chapman et al.:<sup>[2]</sup> moist  $\text{AgOTf}$  (once dry: 202 mg, 0.79 mmol) was subjected to heat ( $\sim 150$ - $200$  °C) under high vacuum until grainy and dry in appearance ( $\sim 15$  min), then was placed under  $\text{CCl}_4$  (0.5 mL, 5.17 mmol) in a flask attached to a condenser with a  $\text{CaSO}_4$ -packed drying tube, before refluxing for 17 h. A 4-drop sample of the supernatant was taken and diluted to 0.6 mL in  $\text{CD}_2\text{Cl}_2$  for comparison with products of the reaction between [Cl<sub>4</sub>MeoCb-I\(OTf\)<sub>2</sub> and CCl<sub>4</sub> in CD<sub>2</sub>Cl<sub>2</sub>](#) by  $^{19}\text{F}$  and  $^{13}\text{C}$  NMR spectroscopy. For  $^{13}\text{C}$  NMR, an additional 4 drops were added to achieve a detectable concentration. A separate sample was diluted in  $\text{CDCl}_3$  for comparison to literature and found to be in close agreement with values reported by Chapman<sup>[2]</sup> ( $^{13}\text{C}$ ) and Petrov<sup>[3]</sup> ( $^{19}\text{F}$ ).

NMR spectra: Figure S1, Figure S2, Figure S3, Figure S4.

*TfO-CCl<sub>3</sub>* (generated via *AgOTf*) <sup>19</sup>F NMR (CDCl<sub>3</sub> + ~10 v% CCl<sub>4</sub>, 470 MHz):<sup>[3]</sup> δ -73.18 (s). <sup>13</sup>C{<sup>1</sup>H} NMR (CDCl<sub>3</sub> + ~20 v% CCl<sub>4</sub>, 126 MHz):<sup>[2]</sup> δ 118.1 (q, *J*<sub>C-F</sub> = 321 Hz; CF<sub>3</sub>), 109.0 (s, CCl<sub>3</sub>). <sup>19</sup>F NMR (CD<sub>2</sub>Cl<sub>2</sub> + ~10 v% CCl<sub>4</sub>, 470 MHz): δ -73.49 (s). <sup>13</sup>C{<sup>1</sup>H} NMR (CD<sub>2</sub>Cl<sub>2</sub> + ~20 v% CCl<sub>4</sub>, 126 MHz): δ 118.5 (q, *J*<sub>C-F</sub> = 322 Hz; CF<sub>3</sub>), 109.5 (s, CCl<sub>3</sub>).

*TfO-CCl<sub>3</sub>* (generated via *Cl<sub>4</sub>MeoCb-I(OTf)<sub>2</sub>*) <sup>19</sup>F NMR (CD<sub>2</sub>Cl<sub>2</sub>, 470 MHz): δ -73.46 (s). <sup>13</sup>C{<sup>1</sup>H} NMR (CD<sub>2</sub>Cl<sub>2</sub>, 126 MHz): δ 118.3 (q, *J*<sub>C-F</sub> = 322 Hz; CF<sub>3</sub>), 109.4 (CCl<sub>3</sub>).

### *Si(OTf)<sub>4</sub>*

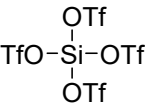 By the method of Hermannsdorfer and Driess;<sup>[4]</sup> under an atmosphere of dry N<sub>2</sub> in darkness, a mixture of *AgOTf* (1009 mg, 3.93 mmol) and *SiI<sub>4</sub>* (505 mg, 0.94 mmol) were stirred under CH<sub>2</sub>Cl<sub>2</sub> (4 mL) for 72 hr. Following this, yellow solids (*AgI*) were pelleted by centrifugation while protected from light, and the supernatant decanted and concentrated *in vacuo*. A colourless to faintly brown oil was obtained (511 mg, 87%) which crystallizes below 0 °C to form white solids with some brown inclusions. These can be separated manually if desired, but the material was found to be sufficiently pure for further reactions in our case. Stored at -30 °C under N<sub>2</sub>.

NMR spectra: Figure S5, Figure S6, Figure S7.

*Si(OTf)<sub>4</sub>*<sup>[4]</sup> <sup>19</sup>F NMR (CDCl<sub>3</sub>, 470 MHz): δ -73.48 (s). <sup>13</sup>C{<sup>1</sup>H} NMR (CDCl<sub>3</sub>, 126 MHz): δ 118.2 (q, *J*<sub>C-F</sub> = 320 Hz). <sup>29</sup>Si{<sup>1</sup>H} NMR (CDCl<sub>3</sub>, 99 MHz): δ -121.10 (s).

### *Cl<sub>4</sub>MeoCb*

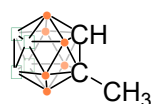

- = BH
- = BCl

**Procedure A (slow, higher yield):** A mixture of 1-methyl-o-carborane (572 mg, 3.62 mmol) and finely ground trichloroisocyanuric acid (TCCA) (3.6 g, 15.5 mmol) in 98%

H<sub>2</sub>SO<sub>4</sub> (12 mL) was stirred at 55°C for 1 hour\* before raising the temperature to 65°C for a further 47 hours. The cooled mixture was decanted into chilled water (150 mL) and solids were collected and washed with water (350 mL), then dissolved in acetone and concentrated until saturated (~25 mL). Trituration with water (75 mL) produced white solids which were collected and dried at 150°C under high vacuum to obtain Cl<sub>4</sub>MeoCb with a ~10% Cl<sub>3</sub>MeoCb impurity (963 mg, 90%).

**Procedure B (fast, lower yield):** A mixture of 1-methyl-o-carborane (330 mg, 2.1 mmol) and finely ground TCCA (1078 mg, 4.6 mmol) in 98% H<sub>2</sub>SO<sub>4</sub> (6 mL) was stirred at 55°C for 1 hr,\* then the temperature was raised to 110 °C over a period of 20 minutes. During this time a fine white precipitate formed. After a further 2.5 hr, the mixture was transferred into 40 mL chilled water. Crude white solids were collected and triturated from acetone (15 mL) by addition of water (75 mL), then were recrystallized in two batches from 20-30% EtOAc:Hexane (reflux → -20 °C) to receive colourless needles (total 442 mg, 72%) composed of Cl<sub>4</sub>MeoCb with a ~10% Cl<sub>3</sub>MeoCb impurity.

\*This step allows initial chlorination to occur before temperatures are reached at which unreacted MeoCb would evaporate.

Cl<sub>4</sub>MeoCb<sup>[5]</sup> <sup>1</sup>H NMR (CDCl<sub>3</sub>, 500 MHz): δ 3.50 (s, 1H; CH), 3.24-1.85 (m, 6H; BH), 2.14 (s, 3H; CH<sub>3</sub>). <sup>11</sup>B NMR (CDCl<sub>3</sub>, 160 MHz): δ 6.22 (s; BCl), 2.99 (s; BCl), -0.64 (s; BCl), -13.70 (d, J<sub>B-H</sub> = 171 Hz; BH), -15.83 (d, J<sub>B-H</sub> = 172 Hz; BH), -19.68 (d, J<sub>B-H</sub> = 183 Hz; BH). <sup>13</sup>C{<sup>1</sup>H} NMR (CDCl<sub>3</sub>, 126 MHz): δ 54.3 (m; C-CH<sub>3</sub>), 45.0 (m; CH), 24.2 (m; CH<sub>3</sub>).

#### Cl<sub>4</sub>MeoCbl (improved procedure)

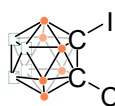

Adapted from the method of Streubel;<sup>[6]</sup> under an atmosphere of dry N<sub>2</sub>, n-butyllithium in hexane (1.6 M, 3.1 mL, 5.0 mmol) was added to a chilled (-30 °C) solution of Cl<sub>4</sub>MeoCb (1.4 g, 4.7 mmol) in diethyl ether (50 mL) and the mixture stirred at room temperature for 1 hr. The mixture was then re-chilled (-30 °C) before addition of I<sub>2</sub> (1.3 g, 5.1 mmol) and was stirred at

room temperature for a further 1 hr. Water (25 mL) was added, followed by saturated sodium thiosulfate solution until colourless (~2 drops, strongly stirred). Products were extracted into diethyl ether and concentrated to receive crude off-white to yellow solids (2.15 g, 107%).\* These were redissolved in dichloromethane (55 mL) to which oxone (17 g, 55 mmol) was added, causing immediate development of I<sub>2</sub> from residual Lil (deep purple). Water (3 mL, 167 mmol), and trifluoroacetic acid (5 mL, 65 mmol) were added and the mixture strongly stirred for a further 1 hour, after which time it had fully decolourized. Supernatant was collected by filtration and washed with water, dried on MgSO<sub>4</sub>, and concentrated. Resulting off-white solids were washed with petroleum spirits (BP 40-60°C) (3 × 5 mL) and dried under vacuum to receive white Cl<sub>4</sub>MeoCbl (1.4 g, 70%).

\*Solids obtained this way contain residual lithium iodide which is resistant to removal by washing with water. The impurity becomes apparent in later oxidation where excess XeF<sub>2</sub> is necessary to first consume the more reactive I<sup>-</sup>, transiently generating visible I<sub>2</sub>. The following step is an optional pre-oxidation intended to convert Lil to less coordinating iodates such as IO<sub>3</sub>H and prevent waste of XeF<sub>2</sub>.

Cl<sub>4</sub>MeoCbl<sup>[5]</sup> **<sup>1</sup>H NMR** (CDCl<sub>3</sub>, 500 MHz): δ 3.88-1.98 (br, 6H; BH), 2.25 (s, 3H; CH<sub>3</sub>). **<sup>11</sup>B NMR** (CDCl<sub>3</sub>, 160 MHz): δ 6.44 (s; BCl), 4.00 (s; BCl), 0.20 (s; BCl), -10.09 (d, J<sub>B-H</sub> = 176 Hz; BH), -12.86 (d, J<sub>B-H</sub> = 176 Hz; BH), -14.60 (d, J<sub>B-H</sub> = 201 Hz; BH). **<sup>13</sup>C{<sup>1</sup>H} NMR** (CDCl<sub>3</sub>, 126 MHz): δ 58.8 (m; C-CH<sub>3</sub>), 26.5 (m; CH<sub>3</sub>), -1.3 (m; C-I). **<sup>1</sup>H NMR** (CD<sub>2</sub>Cl<sub>2</sub>, 500 MHz): δ 4.20-1.80 (br, 6H; BH), 2.24 (s, 3H; CH<sub>3</sub>). **<sup>11</sup>B NMR** (CD<sub>2</sub>Cl<sub>2</sub>, 160 MHz): δ 6.23 (s; BCl), 3.79 (s; BCl), 0.10 (s; BCl), -10.06 (d, J<sub>B-H</sub> = 177 Hz; BH), -13.49 (m; BH). **<sup>13</sup>C{<sup>1</sup>H} NMR** (CD<sub>2</sub>Cl<sub>2</sub>, 126 MHz): δ 59.9 (m; C-CH<sub>3</sub>), 26.7 (m; CH<sub>3</sub>), -0.8 (m; C-I).

#### Cl<sub>4</sub>MeoCb-IF<sub>2</sub> (improved procedure)

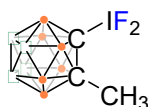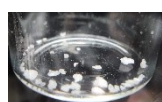

To a polypropylene centrifuge tube containing Cl<sub>4</sub>MeoCbl (415 mg, 0.984 mmol) in CH<sub>2</sub>Cl<sub>2</sub> (6 mL) was added XeF<sub>2</sub> (190 mg, 1.12 mmol) under an N<sub>2</sub> atmosphere. The mixture was briefly agitated to dissolve the XeF<sub>2</sub>, then allowed to stand for 2 hours at room temperature before transfer to a -30 °C freezer where it was left overnight. While

cold, the supernatant was decanted and crystals washed with chilled  $\text{CH}_2\text{Cl}_2$  ( $-30\text{ }^\circ\text{C}$ ,  $2 \times 2\text{ mL}$ ). Once dry, 369 mg (80%) colourless blocky crystals were collected.

The material slowly reacts with glass to produce  $\text{SiF}_4$  but appears stable for extended periods when stored in a polypropylene vessel under inert atmosphere at  $-30\text{ }^\circ\text{C}$ .

NMR spectra ( $\text{CD}_2\text{Cl}_2$ ): Figure S8, Figure S9, Figure S10, Figure S11.

$\text{Cl}_4\text{MeoCb-IF}_2$ <sup>[5]</sup>  $^1\text{H NMR}$  ( $\text{CDCl}_3$ , 500 MHz):  $\delta$  2.39 (s, 3H;  $\text{CH}_3$ ).  $^{19}\text{F NMR}$  ( $\text{CDCl}_3$ , 470 MHz):  $\delta$  -132.92 (s, 2F).  $^{11}\text{B NMR}$  ( $\text{CDCl}_3$ , 160 MHz):  $\delta$  8.32 (s, ; BCl), 4.45 (s; BCl), -0.22 (s; BCl), -12.05 (d,  $J_{\text{B-H}} = 173\text{ Hz}$ ; BH), -13.27 (d,  $J_{\text{B-H}} = 173\text{ Hz}$ ; BH), -18.43 (d,  $J_{\text{B-H}} = 187\text{ Hz}$ ; BH).  $^1\text{H NMR}$  ( $\text{CD}_2\text{Cl}_2$ , 500 MHz):  $\delta$  4.00-2.00 (br, 6H; BH), 2.38 (s, 3H;  $\text{CH}_3$ ).  $^{19}\text{F NMR}$  ( $\text{CD}_2\text{Cl}_2$ , 470 MHz):  $\delta$  -133.83 (s).  $^{11}\text{B NMR}$  ( $\text{CD}_2\text{Cl}_2$ , 160 MHz):  $\delta$  8.05 (s, ; BCl), 4.16 (s; BCl), -0.36 (s; BCl), -12.55 (m; BH), -18.14 (d,  $J_{\text{B-H}} = 193.5\text{ Hz}$ ; BH).  $^{13}\text{C}\{^1\text{H}\}$  NMR ( $\text{CD}_2\text{Cl}_2$ , 126 MHz):  $\delta$  62.3 (m; C $\text{CH}_3$ ), 51.3 (tm,  $J_{\text{C-F}} = 20.4\text{ Hz}$ ; ClF $_2$ ), 25.9 (m;  $\text{CH}_3$ ).

#### $\text{Cl}_4\text{MeoCb-I(F)(OTf)}$

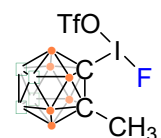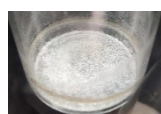

Under an atmosphere of dry  $\text{N}_2$ , a solution of  $\text{Si(OTf)}_4$  (11.4 mg, 0.018 mmol) in  $\text{CD}_2\text{Cl}_2$  (0.5 mL) was added dropwise with agitation over a period of 10 minutes to a glass vial containing partially dissolved  $\text{Cl}_4\text{MeoCb-IF}_2$  (30.9 mg, 0.067 mmol) under a separate volume of  $\text{CD}_2\text{Cl}_2$  (0.5 mL). When addition was complete, all solids had dissolved to produce a faintly yellow solution which was analysed by NMR spectroscopy and found to contain predominantly  $\text{Cl}_4\text{MeoCb-I(F)(OTf)}$ . The sample was then transferred with  $\text{CH}_2\text{Cl}_2$  to a vial under dry  $\text{N}_2$  and solvent was removed *in vacuo*. The resulting white, microcrystalline solids were left under high vacuum for a further 1.5 h, yielding an apparently dry mass of 47 mg (119%).

A sample redissolved in  $\text{CDCl}_3$  and analysed by NMR spectroscopy revealed the source of extra mass as residual  $\text{CH}_2\text{Cl}_2$ , of which 0.5 eq was present, and therefore an undetected additional quantity of  $\text{CD}_2\text{Cl}_2$  as well. We suspect the solvent to be coordinated and hence not readily removed *in vacuo*.

NMR spectra: Figure S12 to Figure S19.

$Cl_4MeoCb-I(F)(OTf)$   $^1H$  NMR ( $CDCl_3$ , 500 MHz):  $\delta$  2.42 (s, 3H;  $CH_3$ ).  $^{19}F$  NMR ( $CDCl_3$ , 470 MHz, \*):  $\delta$  -75.69 (s, 3F;  $CF_3$ ), -147.35 (s, 1F; IF).  $^{11}B$  NMR ( $CDCl_3$ , 160 MHz):  $\delta$  9.20 (s; BCl), 4.94 (s; BCl), 0.16 (s; BCl), -12.46 (m, 4B; BH), -18.56 (d,  $J_{B-H}$  = 173 Hz; BH).  $^{13}C\{^1H\}$  NMR ( $CDCl_3$ , 126 MHz):  $\delta$  118.6 (q,  $J_{C-F}$  = 319 Hz;  $CF_3$ ), 61.4 (C- $CH_3$ ), 52.3 (dm,  $J_{C-I-F}$  = 30 Hz; C-I), 25.9 ( $CH_3$ ).  $^1H$  NMR ( $CD_2Cl_2$ , 500 MHz):  $\delta$  2.40 (s, 3H;  $CH_3$ ).  $^{19}F$  NMR ( $CD_2Cl_2$ , 470 MHz, \*):  $\delta$  -76.29 (s, 3F;  $CF_3$ ), -151.94 (s, 1F; IF).  $^{11}B$  NMR ( $CD_2Cl_2$ , 160 MHz):  $\delta$  8.90 (s; BCl), 4.63 (s; BCl), 0.03 (s; BCl), -12.33 (m, 4B; BH), -18.31 (d,  $J_{B-H}$  = 170 Hz; BH).  $^{13}C\{^1H\}$  NMR ( $CD_2Cl_2$ , 126 MHz):  $\delta$  118.8 (q,  $J_{C-F}$  = 319 Hz;  $CF_3$ ), 62.5 (m; C- $CH_3$ ), 52.7 (dm,  $J_{C-I-F}$  = 25 Hz; C-I), 26.1 (m;  $CH_3$ ).

\* The relaxation time of the I-bound fluorine nucleus was found to be faster than that of C-bound (triflate) nuclei. Therefore, to obtain correctly integrating  $^{19}F$  NMR signals the delay between scans (D1) was lengthened to 3 seconds from our usual default of 1.

#### $Cl_4MeoCb-I(OTf)_2$

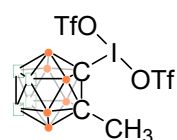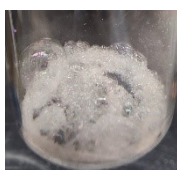

Under an atmosphere of dry  $N_2$ , a solution of  $Si(OTf)_4$  (15 mg, 0.024 mmol) in  $CH_2Cl_2$  (0.75 mL) was decanted atop solid  $Cl_4MeoCb-IF_2$  (20 mg, 0.044 mmol) in a **glass vial**.

The vial was loosely capped and periodically agitated for 10-15 minutes, during which time bubbles of  $SiF_4$  were observed as the solids gradually dissolved. Once homogenous, the solution was concentrated\* *in vacuo* to obtain amorphous, slightly

iridescent, colourless solids which were allowed to dry under vacuum for a further 45 min (30.6 mg, 98%). These were found to contain 10 mol%  $Cl_4MeoCbI$  by  $^1H$  NMR. Solid  $Cl_4MeoCb-I(OTf)_2$  appears stable at  $-30^\circ C$  in glass for at least 24 hr, however, for most further studies it was generated *in situ* and used immediately to avoid degradation by reaction with the solvent during workup.

\*The concentrate expanded to several times its initial volume into a structure of large, solidified bubbles as the last traces of solvent evaporated, so ample distance between the sample and vacuum line is recommended.

NMR spectra: Figure S20, Figure S21, Figure S22, Figure S23, Figure S53.

$Cl_4MeoCb-I(OTf)_2$ <sup>[5]</sup>  $^1H$  NMR ( $CDCl_3$ \*\*):  $\delta$  2.46 (s,  $CH_3$ ).  $^{19}F$  NMR ( $CDCl_3$ , 470 MHz):  $\delta$  -74.34 (s, 6F;  $CF_3$ ).  $^{11}B$  NMR ( $CDCl_3$ , 160 MHz):  $\delta$  9.64 (s; BCl), 5.24 (s; BCl), 0.45 (s; BCl), -12.47 (m; BH), -18.33 (m; BH).  $^{13}C\{^1H\}$  NMR ( $CDCl_3$ , 126 MHz):  $\delta$  118.3 (q,  $J_{C-F}$  = 321 Hz;  $CF_3$ ), 62.0 (m; C- $CH_3$ ), 54.0 (m; C-I), 26.0 (m;  $CH_3$ ).  $^1H$  NMR ( $CD_2Cl_2$ , 500 MHz):  $\delta$  2.45 (s, 3H;  $CH_3$ ).  $^{19}F$  NMR ( $CD_2Cl_2$ , 470 MHz):  $\delta$  -74.61 (s, 6F;  $CF_3$ ).  $^{11}B$  NMR ( $CD_2Cl_2$ , 160 MHz):  $\delta$  9.38 (s; BCl), 4.95 (s; BCl), 0.34 (s; BCl), -12.52 (m, 4B; BH), -18.26 (m, 2H; BH).  $^{13}C\{^1H\}$  NMR ( $CD_2Cl_2$ , 126 MHz):  $\delta$  118.2 (q,  $J_{C-F}$  = 320 Hz;  $CF_3$ ), 63.0 (m; C- $CH_3$ ), 55.1 (m; C-I), 26.3 (m;  $CH_3$ ).

\*\*NMR in  $CDCl_3$  not recommended due to reaction with the solvent.

$SiF_4$ <sup>[4]</sup>  $^{19}F$  NMR ( $CDCl_3$ , 470 MHz):  $\delta$  -161.4 (s).  $^{19}F$  NMR ( $CD_2Cl_2$ , 470 MHz):  $\delta$  -161.8 (s).

#### [4-( $Cl_4MeoCbI$ )PhBr][OTf]

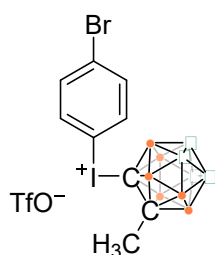

A solution of  $Cl_4MeoCb-I(OTf)_2$  (0.090 mmol) in  $CH_2Cl_2$  (1 mL) was prepared by the [reported method](#) and cooled to  $-30^\circ C$ , then added dropwise over a period of 30 minutes to a  $-30^\circ C$  solution of BrPh (20  $\mu L$ , 0.19 mmol) in  $CH_2Cl_2$  (0.5 mL) with agitation under dry  $N_2$  (glass vial). Both solutions were maintained at low temperature during addition. Once mixed, the red-brown solution was allowed to stand at  $-30^\circ C$  for 24 hours before removal to open air and transfer with  $CH_2Cl_2$  (2 mL) to a polypropylene centrifuge tube. The iodonium salt was precipitated by addition of petroleum spirits (BP  $40-60^\circ C$ ) (7 mL). Supernatant was discarded after centrifugation of the solids, which were washed with a further 2 mL

petroleum spirits, then 2 mL DCM:petroleum spirits (1:1). The resulting white powder was dried under high vacuum with mild heat (~50 °C) for a final mass of 55 mg (84%).

After workup the product is nearly insoluble in chloroform and dichloromethane, but addition of ~2-5 v% HOTf leads to full dissolution.

NMR spectra (isolated product): Figure S24 to Figure S27.

NMR spectra (*o*-isomer in crude reaction concentrate): Figure S28, Figure S29.

Mass spectrum: Figure S94.

*[4-(Cl<sub>4</sub>MeoCbl)PhBr][OTf]* **<sup>1</sup>H NMR** (CDCl<sub>3</sub> + 5 v% HOTf, 500 MHz): δ 7.97 (d, *J* = 8.8 Hz, 2H), 7.91 (d, *J* = 8.8 Hz, 2H), 2.40 (s, 3H). **<sup>19</sup>F NMR** (CDCl<sub>3</sub> + 5 v% HOTf, 470 MHz): δ -76.91 (s, OTf<sup>-</sup>, \*). **<sup>11</sup>B NMR** (CDCl<sub>3</sub> + 5 v% HOTf, 160 MHz): δ 8.66 (s; BCl), 4.35 (s; BCl), 0.74 (s; BCl), -10.20—21.6 (m; BH). **<sup>13</sup>C{<sup>1</sup>H} NMR** (CDCl<sub>3</sub> + 5 v% HOTf, 126 MHz): δ 138.5 (aryl CH), 137.7 (aryl CH), 133.9 (aryl C), 118.6 (q, *J*<sub>C-F</sub> = 317 Hz; CF<sub>3</sub>), 112.7 (aryl C), 59.8 (m), 32.8 (m), 25.4 (m, CH<sub>3</sub>). **<sup>1</sup>H NMR** (CH<sub>2</sub>Cl<sub>2</sub> reaction mixture, 500 MHz): δ 7.98 (d, *J* = 8.9 Hz, 2H), 7.91 (d, *J* = 8.9 Hz, 2H), 2.39 (s, 3H). **<sup>1</sup>H NMR** (CD<sub>3</sub>CN, 500 MHz): δ 8.17 (d, *J* = 8.8 Hz, 2H), 7.92 (d, *J* = 8.8 Hz, 2H), 2.38 (s, 3H). **ESI-MS** (*m/z*) [M]<sup>+</sup> = 577.83.

*[2-(Cl<sub>4</sub>MeoCbl)PhBr][OTf]* (*crude reaction concentrate*) **<sup>1</sup>H NMR** (CDCl<sub>3</sub>, 500 MHz): δ 8.22 (d, *J* = 8.2 Hz, 1H), 8.12 (d, *J* = 8.2 Hz, 1H), 7.88 (t, *J* = 7.9 Hz, 1H), 7.69 (t, *J* = 7.9 Hz, 1H). **<sup>19</sup>F NMR** (CDCl<sub>3</sub>, 470 MHz): δ -77.05 (s, OTf<sup>-</sup>, \*).

\*Converged with HOTf signal.

## Exploratory Reactions

$\text{Cl}_4\text{MeoCb-I}(\text{OTf})_2$  with  $\text{C}_1$  halocarbons to form triflate esters

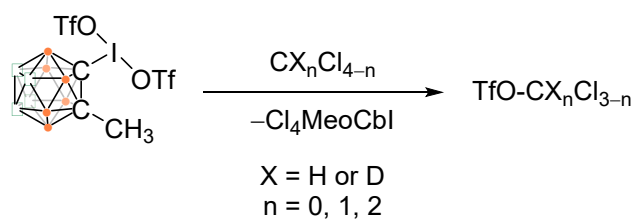

**$\text{Cl}_4\text{MeoCb-I}(\text{OTf})_2$  with neat chloroform and dichloromethane:**  $\text{Cl}_4\text{MeoCb-I}(\text{OTf})_2$  was generated *in situ* by the above [synthetic method](#) at scales of 0.03-0.05 mmol in each of the following solvents:  $\text{CDCl}_3$ ,  $\text{CHCl}_3$ ,  $\text{CD}_2\text{Cl}_2$ ,  $\text{CH}_2\text{Cl}_2$  (0.5-0.6 mL). Reactions were transferred to parafilm-sealed borosilicate glass NMR tubes following complete solvation of  $\text{Cl}_4\text{MeoCb-I}(\text{OTf})_2$  and cessation of bubbling. Some reactions were performed entirely within PTFE NMR tube inserts as glass controls. All reactions were tracked until completion at ~5-25 h for chloroform and ~170-240 h for dichloromethane.\* Conversion to triflate ester(s) is calculated by comparison of their  $^{19}\text{F}$  signals to that of HOTf (the sole major side product) and is 71-96% for  $\text{CDCl}_3/\text{CHCl}_3$  and 57-68%.for  $\text{CD}_2\text{Cl}_2/\text{CH}_2\text{Cl}_2$ .\*

\*Reaction times and conversions appear to depend on vessel material and potentially whether the halocarbon is deuterated or protonated, however, more data with higher consistency in monitoring and conditions (concentration, temperature) is necessary to draw conclusions for  $\text{CHCl}_3$ ,  $\text{CD}_2\text{Cl}_2$ , and  $\text{CH}_2\text{Cl}_2$ . Reasonable comparison of reaction efficiency between vessel materials can be made for  $\text{CDCl}_3$  and is tabulated in the next section (Table S 3).

**TfO- $\text{CHCl}_2$  was isolated as a solution in  $\text{CHCl}_3$**  from a reaction of  $\text{Cl}_4\text{MeoCb-I}(\text{OTf})_2$  with neat  $\text{CHCl}_3$  (glass, 5 h) by washing the mixture with water (0.5 mL) to remove acids, followed by cold distillation of the organic phase under reduced pressure to a receiving NMR tube cooled directly by liquid nitrogen. The compound appears stable for a month or longer in  $\text{CHCl}_3$ , even in the presence of a  $^1\text{H}$  NMR-detectible quantity of water.

**TfO-CD<sub>2</sub>Cl** was isolated as a solution in CD<sub>2</sub>Cl<sub>2</sub> alongside TfO-CDCl<sub>2</sub> (molar ratio 87:13 resp., <sup>19</sup>F NMR) by the same method as for TfO-CHCl<sub>2</sub> with the exception that the solvent was CD<sub>2</sub>Cl<sub>2</sub> and reaction time was 170 h. The two species' pre-workup molar ratio was 93:6 (<sup>19</sup>F NMR), suggesting TfO-CD<sub>2</sub>Cl is not as resistant to hydrolysis as its more highly chlorinated analogues.

NMR spectra (TfO-CXCl<sub>2</sub>, X = H, D): Figure S30 to Figure S38.

NMR spectra (TfO-CX<sub>2</sub>Cl, X = H, D): Figure S39 to Figure S45.

*TfO-CHCl<sub>2</sub>* <sup>1</sup>H NMR (CHCl<sub>3</sub> + CDCl<sub>3</sub>, 400 MHz): δ 7.59 (s). <sup>19</sup>F NMR (CHCl<sub>3</sub> + CDCl<sub>3</sub>, 470 MHz): δ -73.73 (s). <sup>13</sup>C{<sup>1</sup>H} NMR (CHCl<sub>3</sub> + CDCl<sub>3</sub>, 126 MHz): δ 118.3 (q, *J*<sub>C-F</sub> = 321 Hz; CF<sub>3</sub>), 94.7 (CHCl<sub>2</sub>). <sup>1</sup>H NMR (CD<sub>2</sub>Cl<sub>2</sub>, 500 MHz): δ 7.65 (s). <sup>19</sup>F NMR (CD<sub>2</sub>Cl<sub>2</sub>, *in situ* gen., 470 MHz): δ -74.08 (s). <sup>19</sup>F NMR (CD<sub>2</sub>Cl<sub>2</sub> + ~5 v% CHCl<sub>3</sub>, isolated, 470 MHz): δ -74.12 (s). <sup>13</sup>C{<sup>1</sup>H} NMR (CD<sub>2</sub>Cl<sub>2</sub> + ~5 v% CHCl<sub>3</sub>, 126 MHz): 118.6 (q, *J*<sub>C-F</sub> = 321 Hz; CF<sub>3</sub>), 95.3 (CHCl<sub>2</sub>).

*TfO-CDCl<sub>2</sub>* <sup>19</sup>F NMR (CDCl<sub>3</sub>, 470 MHz): δ -73.71 (s). <sup>13</sup>C{<sup>1</sup>H} NMR (CDCl<sub>3</sub>, 126 MHz): δ 118.3 (q, *J*<sub>C-F</sub> = 321 Hz; CF<sub>3</sub>), 94.5 (t, *J*<sub>C-D</sub> = 32 Hz; CDCl<sub>2</sub>). <sup>19</sup>F NMR (CD<sub>2</sub>Cl<sub>2</sub>, 470 MHz): δ -74.08 (s).

*TfO-CH<sub>2</sub>Cl* <sup>1</sup>H NMR (CH<sub>2</sub>Cl<sub>2</sub> + CD<sub>2</sub>Cl<sub>2</sub>, 500 MHz): δ 5.97 (s). <sup>19</sup>F NMR (CH<sub>2</sub>Cl<sub>2</sub> + CD<sub>2</sub>Cl<sub>2</sub>, 470 MHz): δ -74.86 (s). <sup>13</sup>C{<sup>1</sup>H} NMR (CH<sub>2</sub>Cl<sub>2</sub> + CD<sub>2</sub>Cl<sub>2</sub>, 126 MHz): δ 118.6 (q, *J*<sub>C-F</sub> = 320 Hz; CF<sub>3</sub>), 78.1 (CH<sub>2</sub>Cl).

*TfO-CD<sub>2</sub>Cl* <sup>19</sup>F NMR (CD<sub>2</sub>Cl<sub>2</sub>, 470 MHz): δ -74.89 (s). <sup>13</sup>C{<sup>1</sup>H} NMR (CD<sub>2</sub>Cl<sub>2</sub>, 126 MHz): δ 118.6 (q, *J*<sub>C-F</sub> = 320 Hz; CF<sub>3</sub>), 77.7 (quint, *J*<sub>C-D</sub> = 28 Hz; CD<sub>2</sub>Cl).

**Observation of TfO-CXCl<sub>2</sub> and CHCl<sub>3</sub> generated by reaction of Cl<sub>4</sub>MeoCb-I(OTf)<sub>2</sub> with CX<sub>2</sub>Cl<sub>2</sub> (X = H/D):**

During a reaction of Cl<sub>4</sub>MeoCb-I(OTf)<sub>2</sub> with neat CH<sub>2</sub>Cl<sub>2</sub>, alongside the expected TfO-CH<sub>2</sub>Cl, trace generation of CHCl<sub>3</sub> was observed in <sup>1</sup>H NMR followed by that of its respective triflate ester, TfO-CHCl<sub>2</sub>. In the final scan, CHCl<sub>3</sub> (also detected in <sup>13</sup>C{<sup>1</sup>H} NMR) and TfO-CHCl<sub>2</sub> appear in greater quantity in a 1:1 ratio as minor products (Figure S39, Figure S40, Figure S42). In the analogous reaction with CD<sub>2</sub>Cl<sub>2</sub>, TfO-CDCl<sub>2</sub> is detectable in <sup>19</sup>F NMR (Figure S43 to Figure S45).

**Cl<sub>4</sub>MeoCb-I(OTf)<sub>2</sub> with CCl<sub>4</sub>:** CCl<sub>4</sub> (8.5 μL, 0.088 mmol) was added to a solution of Cl<sub>4</sub>MeoCb-I(OTf)<sub>2</sub> (generated *in situ* by the [reported method](#), 0.044 mmol) in CD<sub>2</sub>Cl<sub>2</sub> (0.6 mL). The reaction was tracked by NMR (glass tube) until completion at 130 h (full reduction of Cl<sub>4</sub>MeoCb-I(OTf)<sub>2</sub> to Cl<sub>4</sub>MeoCbI), at which time TfO-CCl<sub>3</sub>, TfO-CD<sub>2</sub>Cl, and TfO-CDCl<sub>2</sub> were present in a 71:27:2 respective molar ratio, with 72% of total triflate having formed esters and the remainder present as HOTf (<sup>19</sup>F NMR). Signals of the major product (TfO-CCl<sub>3</sub>) in <sup>19</sup>F and <sup>13</sup>C{<sup>1</sup>H} NMR closely match those of TfO-CCl<sub>3</sub> generated by a [literature method](#) in a similar solvent environment.

NMR spectra: Figure S46, Figure S47.

TfO-CCl<sub>3</sub> (generated via Cl<sub>4</sub>MeoCb-I(OTf)<sub>2</sub>) <sup>19</sup>F NMR (CD<sub>2</sub>Cl<sub>2</sub>, 470 MHz): δ -73.46 (s). <sup>13</sup>C{<sup>1</sup>H} NMR (CD<sub>2</sub>Cl<sub>2</sub>, 126 MHz): δ 118.3 (q, J<sub>C-F</sub> = 322 Hz; CF<sub>3</sub>), 109.4 (CCl<sub>3</sub>).

TfO-CCl<sub>3</sub> ([generated via AgOTf](#)) <sup>19</sup>F NMR (CD<sub>2</sub>Cl<sub>2</sub> + ~10 v% CCl<sub>4</sub>, 470 MHz): δ -73.49 (s). <sup>13</sup>C{<sup>1</sup>H} NMR (CD<sub>2</sub>Cl<sub>2</sub> + ~20 v% CCl<sub>4</sub>, 126 MHz): δ 118.5 (q, J<sub>C-F</sub> = 322 Hz; CF<sub>3</sub>), 109.5 (s, CCl<sub>3</sub>).

#### Cl<sub>4</sub>MeoCb-I(OTf)<sub>2</sub> with CDCl<sub>3</sub> in glass vs PTFE; Observation of Cl<sub>4</sub>MeoCb-I(Cl)(OTf)

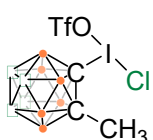

Cl<sub>4</sub>MeoCb-I(OTf)<sub>2</sub> generated *in situ* by the [reported method](#) in CDCl<sub>3</sub> was tracked by NMR to obtain the following data on conversion to TfO-CDCl<sub>2</sub> and observations of the proposed intermediate Cl<sub>4</sub>MeoCb-I(Cl)(OTf).

Table S 3. Comparison of the reaction between Cl<sub>4</sub>MeoCb-I(OTf)<sub>2</sub> and CDCl<sub>3</sub> (solvent) in different vessel materials (multiple runs). <sup>a</sup>Initial loading of Cl<sub>4</sub>MeoCb-I(OTf)<sub>2</sub>. <sup>b</sup>For full reduction to Cl<sub>4</sub>MeoCbI. <sup>c</sup>By comparison of <sup>19</sup>F NMR signal intensity of TfO-CDCl<sub>2</sub> vs HOTf.

| Vessel | μM <sup>a</sup> | Time <sup>b</sup> | Conv. to TfO-CDCl <sub>2</sub> <sup>c</sup> |
|--------|-----------------|-------------------|---------------------------------------------|
| Glass  | 36-55           | 5-12 h            | 68-73%                                      |
| PTFE   | 50-66           | 16-25 h           | 89-96%                                      |

NMR spectra (vessel material comparison): Figure S36 compared with Figure S37

NMR spectra (intermediate observation): Figure S48 to Figure S53.

$Cl_4MeoCb-I(Cl)(OTf)$   $^1H$  NMR ( $CDCl_3$ , 500 MHz):  $\delta$  2.37 (s;  $CH_3$ ),  $^{19}F$  NMR ( $CDCl_3$ , 470 MHz):  $\delta$  -76.15 (s;  $CF_3$ ).  $^{11}B$  NMR ( $CDCl_3$ , 160 MHz):  $\delta$  9.08 (s;  $B(Cl)$ ), 4.82 (s;  $B(Cl)$ ), 0.38 (s;  $B(Cl)$ ), -9.00 - -22.00 (m;  $BH$ ).  $^{13}C\{^1H\}$  NMR ( $CDCl_3$ , 126 MHz):  $\delta$  118.3 (q,  $J_{C-F}$  = 321 Hz;  $CF_3$ ), 61.7 (m;  $C-CH_3$ ), 41.0 (m;  $C-I$ ), 25.7 (m;  $CH_3$ ).

### Glassware/solvent $H_2O$ quantification with $Tf_2O$

Under an atmosphere of dry  $N_2$ , a concentrated sample of  $Tf_2O$  (60 mg) in  $CDCl_3$  (0.6 mL) was prepared. The sample was analysed by NMR spectroscopy for comparison of the amount of acid arising from the glass and/or present in the  $Tf_2O$  itself to that produced by the reaction of  $Cl_4MeoCb-I(OTf)_2$  with  $CDCl_3$  under the same conditions.

NMR spectra ( $Tf_2O$ ): Figure S54, Figure S55.

NMR spectra (Completed  $CDCl_3$  +  $Cl_4MeoCb-I(OTf)_2$  reaction): Figure S56, Figure S37.

$Tf_2O$   $^{19}F$  NMR ( $CDCl_3$ , 376 MHz):  $\delta$  71.45 (s).

### $Cl_2$ detection in the reaction of $Cl_4MeoCb-I(OTf)_2$ with $CDCl_3$ using $Ph_3Sb$

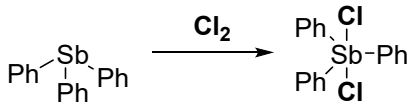
 $Cl_4MeoCb-I(OTf)_2$  (0.033 mmol) generated *in situ* by the [reported method](#) in  $CDCl_3$  (0.6 mL, glass NMR tube, parafilm sealed) was allowed to react overnight, then analysed by NMR to ensure full reduction to I(I) had occurred. At this time,  $Cl_4MeoCbI$ , HOTf, and TfO- $CDCl_2$  were the only species detectible, and the solution was faintly yellow.  $Ph_3Sb$  (10.4 mg, 0.03 mmol) was added under  $N_2$ , which led to complete decolourisation. Further NMR analysis ( $^1H$ ,  $^{13}C\{^1H\}$ ) showed  $Ph_3SbCl_2$ ,  $Ph_2SbCl$ ,  $C_6H_6$ , and residual  $Ph_3Sb$ . One other major aromatic product was present with NMR shifts in  $CDCl_3$  closely matching those of  $Ph_3Sb(OTf)_2$  in  $CD_2Cl_2$  across  $^1H$ ,  $^{13}C\{^1H\}$ , and  $^{19}F$  spectra.

Alongside comparison to literature, the identity of  $\text{Ph}_3\text{SbCl}_2$  was confirmed by its synthesis in a separate solution.  $\text{Ph}_3\text{Sb}$  (11 mg) in  $\text{CDCl}_3$  (0.6 mL) was exposed to  $\text{Cl}_2$  gas until the solution remained yellow, then the mixture was analysed by NMR. Near quantitative conversion to  $\text{Ph}_3\text{SbCl}_2$  was observed with some trace side products.

NMR spectra (reaction): Figure S57 to Figure S60.

NMR spectra ( $\text{Cl}_2\text{SbPh}_3$  standard): Figure S61, Figure S62.

$\text{Ph}_2\text{SbCl}_2$ <sup>[7]</sup>  $^1\text{H}$  NMR ( $\text{CDCl}_3$ , 500 MHz):  $\delta$  7.64 (m, \*), 7.46-7.37 (m, \*).  $^{13}\text{C}\{^1\text{H}\}$  NMR ( $\text{CDCl}_3$ , 126 MHz):  $\delta$  144.7, 134.5, 130.2, 129.4.

\*Signal mostly overlapped.

$\text{Ph}_3\text{SbCl}_2$ <sup>[7]</sup>  $^1\text{H}$  NMR ( $\text{CDCl}_3$ , 500 MHz):  $\delta$  8.23 (m, 6H), 7.56 (m, 9H).  $^{13}\text{C}\{^1\text{H}\}$  NMR ( $\text{CDCl}_3$ , 126 MHz):  $\delta$  140.1, 134.3, 131.9, 129.8.

$\text{Ph}_3\text{Sb}(\text{OTf})_2$ <sup>[8]</sup>  $^1\text{H}$  NMR ( $\text{CDCl}_3$ , 500 MHz):  $\delta$  8.07 (m, 6H) 7.66 (m, 9H).  $^{19}\text{F}$  NMR ( $\text{CDCl}_3$ , 470 MHz):  $\delta$  -77.87 (s).  $^{13}\text{C}\{^1\text{H}\}$  NMR ( $\text{CDCl}_3$ , 126 MHz):  $\delta$  134.1, 133.3, 130.6, 119.1 (q,  $J_{\text{C-F}} = 319$  Hz).

#### *Attempted syntheses of $\text{Cl}_4\text{MeoCb-I(Cl)}(\text{OTf})$*

**$\text{Cl}_4\text{MeoCb-I(OTf)}_2 + [\text{NBu}_4]\text{Cl}$ :**  $\text{Cl}_4\text{MeoCb-I(OTf)}_2$  was generated in situ at 0.045 mmol scale by the [reported procedure](#) in  $\text{CD}_2\text{Cl}_2$  (0.25 mL), then the mixture was cooled to  $-30$  °C. A separate solution of tetrabutylammonium chloride ( $[\text{NBu}_4]\text{Cl}$ , 12.6 mg, 0.045 mmol) in  $\text{CD}_2\text{Cl}_2$  (0.4 mL) was chilled to  $-30$  °C, then added dropwise with agitation over 2 minutes. The resulting faintly yellow solution was transferred to an NMR tube and analysed immediately.

At the time of first scan, 42% of the  $\text{Cl}_4\text{MeoCb-I(OTf)}_2$  had already been reduced to  $\text{I(I)}$ , with the remainder composed of a species of similar  $\text{CH}_3$  chemical shift to previous observation of  $\text{Cl}_4\text{MeoCb-I(Cl)}(\text{OTf})$  and a small quantity of an unidentified species appearing at 2.33 ppm ( $^1\text{H}$  NMR).  $^{19}\text{F}$  NMR

diverged considerably from previous observations with a single covalent triflate chemical shift instead matching  $\text{Cl}_4\text{MeoCb-I(OTf)}_2$ . Ionic triflate was also generated in a 1:1 ratio with bound triflate ( $^{19}\text{F}$  NMR). For a single species to achieve this ratio when approximately half the I(III) is already reduced to I(I) necessitates its ligation by two covalent triflates.

The solution was returned to inert conditions (dry  $\text{N}_2$ ), and the solvent removed in vacuo to receive a colourless oil which was immediately redissolved in  $\text{CDCl}_3$  for further NMR analysis. Similar results to those in  $\text{CD}_2\text{Cl}_2$  were obtained, where the I(III) species'  $^1\text{H}$  chemical shift was almost identical to previous observations of  $\text{Cl}_4\text{MeoCb-I(Cl)(OTf)}$ , however, its  $^{19}\text{F}$  signal was significantly downfield, closely matching  $\text{Cl}_4\text{MeoCb-I(OTf)}_2$ . The mixture was tracked over the course of an unusually lengthy degradation of I(III) to I(I) (62 h). Reduction was not driven by the expected reaction with solvent  $\text{CDCl}_3$ , as this only occurred in trace quantity. Instead, signals in the alkene/alkyl triflate region appeared in  $^1\text{H}$  NMR, and numerous new triflates in  $^{19}\text{F}$  NMR, indicating a potential reaction with  $[\text{NBu}_4]^+$ .

NMR spectra (initial): Figure S63 to Figure S67.

NMR spectra (+ 62 h): Figure S68, Figure S69.

**$\text{Cl}_4\text{MeoCb-I(OTf)}_2 + [\text{NBu}_4][\text{OTf}]$ :**  $\text{Cl}_4\text{MeoCb-I(OTf)}_2$  was generated in situ at 0.012 mmol scale by the [reported procedure](#) in  $\text{CDCl}_3$  (0.6 mL) containing  $[\text{NBu}_4][\text{OTf}]$  (5.2 mg, 0.013 mmol). Normally when  $\text{Cl}_4\text{MeoCb-I(OTf)}_2$  is synthesised in  $\text{CDCl}_3$  a brief but intense colour change to yellow is observed (suspected to be  $\text{Cl}_2$ ), but in the presence of  $[\text{NBu}_4][\text{OTf}]$  no colour developed.  $^1\text{H}$  and  $^{19}\text{F}$  NMR showed near identical signals to those observed in the case of  $[\text{NBu}_4]\text{Cl}$ , which can hence be assigned as  $[\text{NBu}_4][\text{Cl}_4\text{MeoCb-I(OTf)}_3]$ . Consistent with previous observation of this compound, no initial reaction with the solvent occurred but a trace was detectable after  $\sim 4$  h.

If substoichiometric  $\text{Si(OTf)}_4$  is used in this reaction, a second set of signals in  $^1\text{H}$  and  $^{19}\text{F}$  NMR are observed which correspond to  $[\text{NBu}_4][\text{Cl}_4\text{MeoCb-I(F)(OTf)}_2]$ . This was also previously observed in trace quantity in the reaction of  $\text{Cl}_4\text{MeoCb-I(OTf)}_2$  with  $[\text{NBu}_4]\text{Cl}$ .

NMR spectra: Figure S70 to Figure S73.

$[NBu_4][Cl_4MeoCb-I(OTf)_3]$   $^1H$  NMR ( $CD_2Cl_2$ , 500 MHz):  $\delta$  3.11 (m;  $NBu_4^+$ ), 2.36 (s, 3H;  $CH_3$ ), 1.61 (quint;  $NBu_4^+$ ), 1.42 (hext;  $NBu_4^+$ ), 1.01 (t;  $NBu_4^+$ ).  $^{19}F$  NMR ( $CD_2Cl_2$ , 470 MHz):  $\delta$  -74.59 (s;  $IOSO_2CF_3$ ), -78.43 (s;  $^-OSO_2CF_3$ ).  $^1H$  NMR ( $CDCl_3$ , 500 MHz):  $\delta$  3.14 (m;  $NBu_4^+$ ), 2.39-2.35\* (s, 3H;  $CH_3$ ), 1.60 (quint;  $NBu_4^+$ ), 1.43 (hext;  $NBu_4^+$ ), 1.02 (t;  $NBu_4^+$ ).  $^{19}F$  NMR ( $CDCl_3$ , 470 MHz):  $\delta$  -74.18--74.26\* (s;  $IOSO_2CF_3$ ), -77.84 (s;  $^-OSO_2CF_3$ ).  $^{13}C\{^1H\}$  NMR ( $CDCl_3$ , 126 MHz):  $\delta$  118.7 (quint,  $J_{C-F}$  = 320 Hz;  $IOSO_2CF_3$  +  $^-OSO_2CF_3$ , offset =  $J_{C-F}$ ), 62.2 (m), 52.5 (m), 25.6 (m).

\*Shift variation observed with  $[NBu_4][OTf]$  loading (apparent 0.75 vs 2 eq). Higher loading leads to upfield shift of  $CH_3$  in  $^1H$ , and downfield shift of covalent OTf in  $^{19}F$ .

$[NBu_4][Cl_4MeoCb-I(F)(OTf)_2]$   $^1H$  NMR ( $CDCl_3$ , 400 MHz):  $\delta$  3.14 (m;  $NBu_4^+$ ), 2.34 (s, 3H;  $CH_3$ ), 1.61 (quint;  $NBu_4^+$ ), 1.43 (hext;  $NBu_4^+$ ), 1.02 (t;  $NBu_4^+$ ).  $^{19}F$  NMR ( $CDCl_3$ , 376 MHz):  $\delta$  -76.47 (s;  $IOSO_2CF_3$ ), -77.85 (s;  $^-OSO_2CF_3$ ), -162.92 (s; I-F).

**$Cl_4MeoCb-I(OTf)_2$  + TMSCl:**  $Cl_4MeoCb-I(OTf)_2$  was generated in situ (0.032 mmol) in  $CD_2Cl_2$  (0.25 mL) by the [reported method](#), then transferred to a PTFE NMR tube insert, to which TMSCl (4  $\mu$ L, 0.032 mmol) in  $CD_2Cl_2$  (0.25 mL) was added dropwise over 4 minutes with agitation. Immediate NMR analysis showed  $Cl_4MeoCb-I(OTf)_2$  and  $Cl_4MeoCbI$  signals in a ~1:1 ratio ( $^1H$ ) with a trace of residual  $Cl_4MeoCb-I(F)(OTf)$  (from generation of  $Cl_4MeoCb-I(OTf)_2$ ), and full conversion of TMSCl to TMSOTf. Over the following 30 minutes TMSOTf reacted with  $Cl_4MeoCb-I(F)(OTf)$  to form the typical set of products associated with this reaction; TMSF,  $Me_2SiF_2$ , and MeOTf.<sup>[5]</sup>

NMR spectra: Figure S74, Figure S75.

NMR spectra (TMSOTf standard in  $CD_2Cl_2$ ): Figure S76, Figure S77.

TMSOTf  $^1H$  NMR ( $CD_2Cl_2$ , 400 MHz):  $\delta$  0.50 (s).  $^{19}F$  NMR ( $CD_2Cl_2$ , 376 MHz): -77.48 (s).

### *Interception of Cl<sub>4</sub>MeoCb-I(Cl)(OTf) with BrPh as a chlorination probe*

A typical reaction of *in situ* generated Cl<sub>4</sub>MeoCb-I(OTf)<sub>2</sub> (0.03 mmol) with CDCl<sub>3</sub> (0.5 mL) in a PTFE insert was tracked by NMR until Cl<sub>4</sub>MeoCb-I(Cl)(OTf) appeared to have reached its maximum concentration (~3 h in this case), then bromobenzene (3 μL, 0.03 mmol) was added under dry N<sub>2</sub>. This resulted in immediate development of a red-brown hue.

NMR spectra: Figure S78 to Figure S82.

*p*-bromochlorobenzene<sup>[9]</sup> <sup>1</sup>H NMR (CDCl<sub>3</sub>, 400 MHz): δ 7.42 (d, *J* = 8.7 Hz), 7.21\* (lit.). <sup>13</sup>C{<sup>1</sup>H} NMR (CDCl<sub>3</sub>, 101 MHz): δ 133.4, 132.9, 130.4, 120.4.

*o*-bromochlorobenzene<sup>[10]</sup> <sup>1</sup>H NMR (CDCl<sub>3</sub>, 400 MHz): δ 7.62 (d, *J* = 7.7 Hz, 1H), 7.45 (d, *J* = 7.7 Hz), 7.21\* (lit.), 7.12 (t, *J* = 7.7 Hz, 1H). <sup>13</sup>C{<sup>1</sup>H} NMR (CDCl<sub>3</sub>, 101 MHz): δ 134.6, 134.0, 130.6, 128.6, 128.0, 122.4\* (lit.).

\*Marked signal obscured due to overlap and/or low intensity, so literature value is given.

### *[4-(Cl<sub>4</sub>MeoCbI)PhBr][OTf] with [NBu<sub>4</sub>]Cl as a nucleophilic chlorination control*

Under dry N<sub>2</sub> a solution of [NBu<sub>4</sub>]Cl (4.1 mg, 0.015 mmol) in CDCl<sub>3</sub> (0.6 mL) was deposited atop solid [4-(Cl<sub>4</sub>MeoCbI)PhBr][OTf] (9.7 mg, 0.013 mmol). The mixture was analysed by NMR spectroscopy after 20 minutes to find that approximately one third of the [4-(Cl<sub>4</sub>MeoCbI)PhBr] had dissolved (typically insoluble), and its <sup>1</sup>H environments had, on average, shifted slightly upfield relative to their positions in media containing HOTf (used for solubilisation). Aryl <sup>1</sup>H environments had diverged +0.04 ppm and -0.2 ppm, and the *o*-carboranyl CH<sub>3</sub> environment by -0.05 ppm. Aside from this apparent interaction with Cl<sup>-</sup>, no aryl chlorination was observed.

NMR spectra: Figure S83, Figure S84.

*[4-(Cl<sub>4</sub>MeoCb)PhBr][OTf]·[NBu<sub>4</sub>]Cl* **<sup>1</sup>H NMR** (CDCl<sub>3</sub>, 400 MHz): δ 8.01 (d, *J* = 8.7 Hz, 2H), 7.72 (d, *J* = 8.7 Hz, 2H), 2.34 (s, 3H). **<sup>19</sup>F NMR** (CDCl<sub>3</sub>, 376 MHz): δ 78.10 (s).

#### *Attempted syntheses of Cl<sub>4</sub>MeoCb-I(Cl)(F) and Cl<sub>4</sub>MeoCb-ICl<sub>2</sub>*

**Cl<sub>4</sub>MeoCb-IF<sub>2</sub> + TMSCl:** Under dry N<sub>2</sub> in a polypropylene Eppendorf tube, Cl<sub>4</sub>MeoCb-IF<sub>2</sub> (10.6 mg, 0.023 mmol) and TMSCl (2.6 μL, 0.020 mmol) were combined under CDCl<sub>3</sub> (0.6 mL) and stirred for 3 h before transfer to a PTFE NMR tube insert for analysis. Solid Cl<sub>4</sub>MeoCb-IF<sub>2</sub> remained mostly undissolved. <sup>1</sup>H and <sup>19</sup>F NMR showed TMSCl, TMSF, Cl<sub>4</sub>MeoCb-IF<sub>2</sub>, and a larger quantity of Cl<sub>4</sub>MeoCbI in solution simultaneously, with no signals attributable to Cl<sub>4</sub>MeoCb-I(Cl)(F).

NMR spectra: Figure S85, Figure S86.

*TMSF* **<sup>1</sup>H NMR** (CDCl<sub>3</sub>, 500 MHz): 0.24 (d, *J*<sub>H-C-Si-F</sub> = 7.5 Hz). **<sup>19</sup>F NMR** (CDCl<sub>3</sub>, 470 MHz): δ -157.61 (m). **<sup>13</sup>C{<sup>1</sup>H} NMR** (CDCl<sub>3</sub>, 126 MHz): 0.25 (d, *J*<sub>C-Si-F</sub> = 15 Hz).

**Cl<sub>4</sub>MeoCb-I(OTf)<sub>2</sub> + 2 [NBu<sub>4</sub>]Cl:** Under dry N<sub>2</sub>, [NBu<sub>4</sub>]Cl (10.3 mg, 0.037 mmol) was added to a solution of Cl<sub>4</sub>MeoCb-I(OTf)<sub>2</sub> (0.018 mmol) generated in CD<sub>2</sub>Cl<sub>2</sub> (0.6 mL) by the [typical method](#), causing the solution to become faintly yellow. Immediate NMR analysis showed complete reduction of the oxidant by CH<sub>3</sub> shift (<sup>1</sup>H), and full conversion of I-bound triflates to ionic (<sup>19</sup>F NMR: δ -74.61 to -78.8 ppm).

#### *Cl<sub>4</sub>MeoCb-I(OTf)<sub>2</sub> with alkanes*

**Cyclohexane:** Under dry N<sub>2</sub> cyclohexane (6.3 μL, 0.058 mmol) was added to a solution of Cl<sub>4</sub>MeoCb-I(OTf)<sub>2</sub> (0.058 mmol) generated in CD<sub>2</sub>Cl<sub>2</sub> (0.6 mL) by the [reported method](#). The solution developed a deep yellow hue after 1-2 min, darkening to black by 10 min. The mixture was analysed by NMR after 50 minutes.

NMR spectra: Figure S87, Figure S88.

**Pentane:** Under dry N<sub>2</sub>, Cl<sub>4</sub>MeoCb-I(OTf)<sub>2</sub> (50 mg, 0.074 mmol)\* was dissolved in CD<sub>2</sub>Cl<sub>2</sub> (0.6 mL) and pentane (10 μL, 0.086 mmol) was added. The solution was stored in a sealed glass NMR tube under inert conditions for 3 days, after which time the solution had turned black.

\*Cl<sub>4</sub>MeoCb-I(OTf)<sub>2</sub> was synthesized in and isolated from CH<sub>2</sub>Cl<sub>2</sub> by the [reported method](#), then stored at -30 °C overnight before use. It was found to consist of 85 mol% I(III), with a resulting average molar mass of ~675 gmol<sup>-1</sup>. This is used to calculate the mmol value reported above. A trace of TfO-CH<sub>2</sub>Cl was also detected prior to use.

NMR spectra: Figure S89, Figure S90.

**Propane:** A solution of Cl<sub>4</sub>MeoCb-I(OTf)<sub>2</sub> (0.03 mmol) in CD<sub>2</sub>Cl<sub>2</sub> (0.6 mL) was prepared by the [stated procedure](#), transferred to a glass NMR tube sealed with a pierceable septum and tightly wrapped with parafilm. A CaSO<sub>4</sub>-packed drying tube (approx. 30 × 4 cm) that had been heated to 120°C for the prior 24 h was purged with N<sub>2</sub> until cool, then connected to a supply of propane (camping stove supply sourced from Bunnings Warehouse) and purged until the gas began to visibly emerge from the output line. The solution containing Cl<sub>4</sub>MeoCb-I(OTf)<sub>2</sub> was frozen on LN<sub>2</sub> and the NMR tube headspace purged with propane until a small amount of the gas liquified atop the sample. Then, ensuring the tube remained safely vented, the sample was allowed to warm until the excess propane had boiled out, then was sealed under slight positive pressure. The sample was allowed to react for 25 h before NMR analysis, at which time reduction of Cl<sub>4</sub>MeoCb-I(OTf)<sub>2</sub> was found to be complete. After 3 days the reaction mixture had turned dark brown.

NMR spectra: Figure S91, Figure S92.

*Propane* <sup>1</sup>H NMR (CD<sub>2</sub>Cl<sub>2</sub>, 400 MHz): δ 1.33 (sept, *J* = 7.3 Hz, 2H), 0.90 (t, *J* = 7.3 Hz, 6H).

*Propene* <sup>1</sup>H NMR (CD<sub>2</sub>Cl<sub>2</sub>, 400 MHz): δ 5.28 (dq, *J*<sub>1,2</sub> = 6.6 Hz, *J*<sub>3</sub> = 2.6 Hz, 1H), 4.65 (dd, *J*<sub>1</sub> = 11.9 Hz, *J*<sub>2</sub> = 2.6 Hz, 1H), 4.58 (dd, *J*<sub>1</sub> = 11.9 Hz, *J*<sub>2</sub> = 6.6 Hz, 1H), 1.60 (d, *J* = 6.6 Hz, 3H).

**Ethane, methane (no reaction):** Gases were delivered as an apparent 75:13:12 mol (C<sub>2</sub>H<sub>6</sub>:CH<sub>4</sub>:C<sub>3</sub>H<sub>8</sub>) mixture (from building supply) by the same method as used for propane, and their presence in solution confirmed by <sup>1</sup>H NMR. Ethane appeared at an abundance of 1.2 eq, methane at 0.2 eq, and undesired propane at 0.19 eq relative to Cl<sub>4</sub>MeoCb-I(OTf)<sub>2</sub>. Propane was consumed to form previously observed products, but the presence of methyl triflate, ethene, or ethyl triflate(s) could not be confirmed after full reduction of the oxidant, even at up to 50°C (24 h). Higher temperatures and allowance of longer reaction time are counterproductive in this case due to the oxidant's competing reaction with the solvent (CD<sub>2</sub>Cl<sub>2</sub>), which lead to full reduction within the stated time.

NMR spectrum (initial conditions): Figure S93.

*Ethane* <sup>1</sup>H NMR (CD<sub>2</sub>Cl<sub>2</sub>, 500 MHz): δ 0.85 (s).

*Methane* <sup>1</sup>H NMR (CD<sub>2</sub>Cl<sub>2</sub>, 500 MHz): δ 0.21 (s).

## NMR Spectra

TfO-CCl<sub>3</sub>

CDCl<sub>3</sub> + CCl<sub>4</sub>

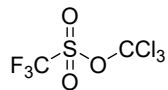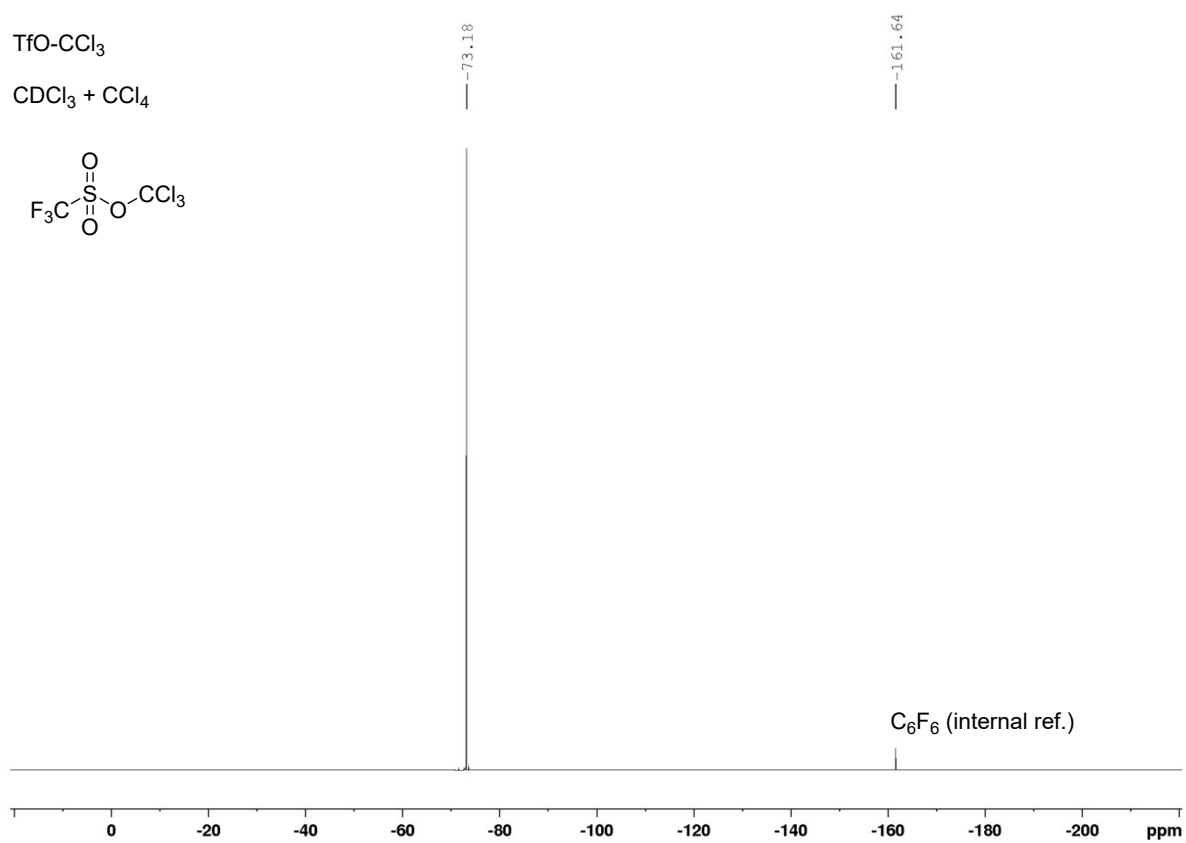

Figure S1. <sup>19</sup>F NMR (CDCl<sub>3</sub> + ~10 v% CCl<sub>4</sub>, 470 MHz): TfO-CCl<sub>3</sub>.

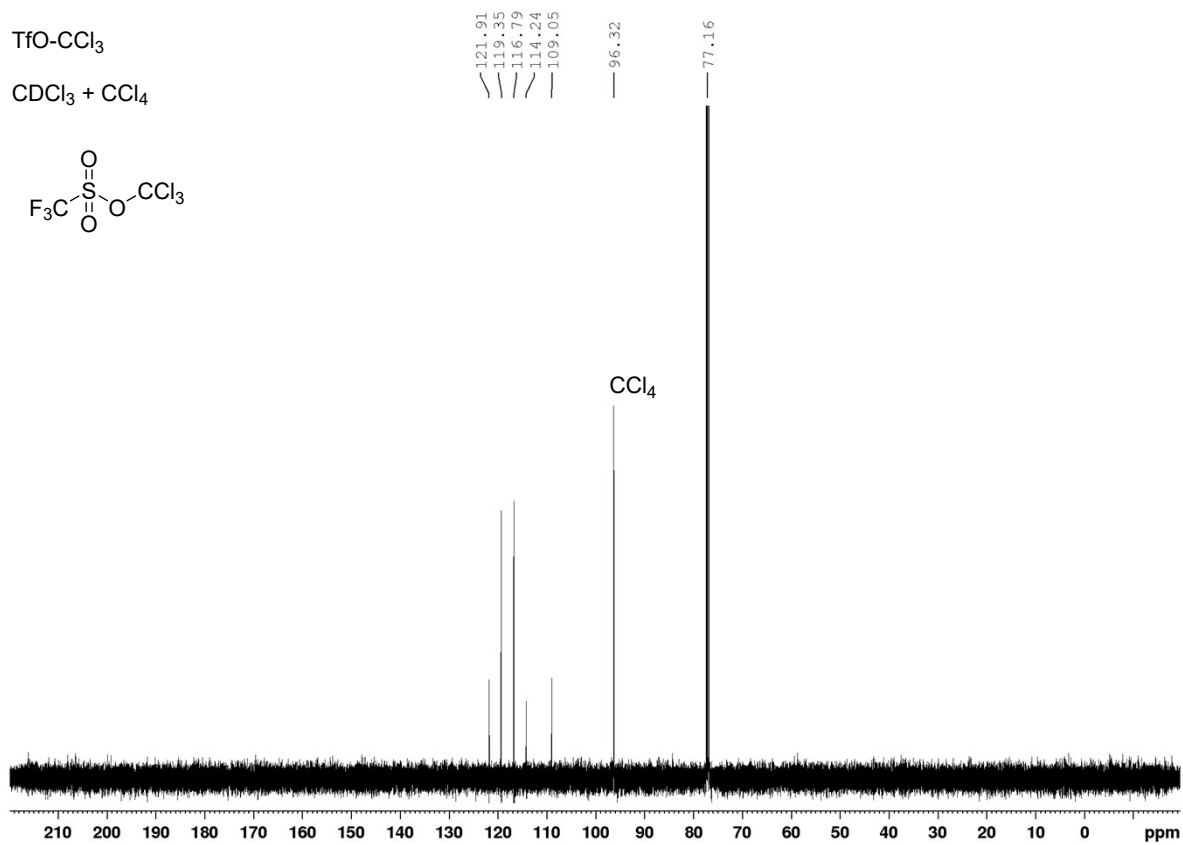

Figure S2. <sup>13</sup>C{<sup>1</sup>H} NMR (CDCl<sub>3</sub> + ~20 v% CCl<sub>4</sub>, 126 MHz): TfO-CCl<sub>3</sub>.

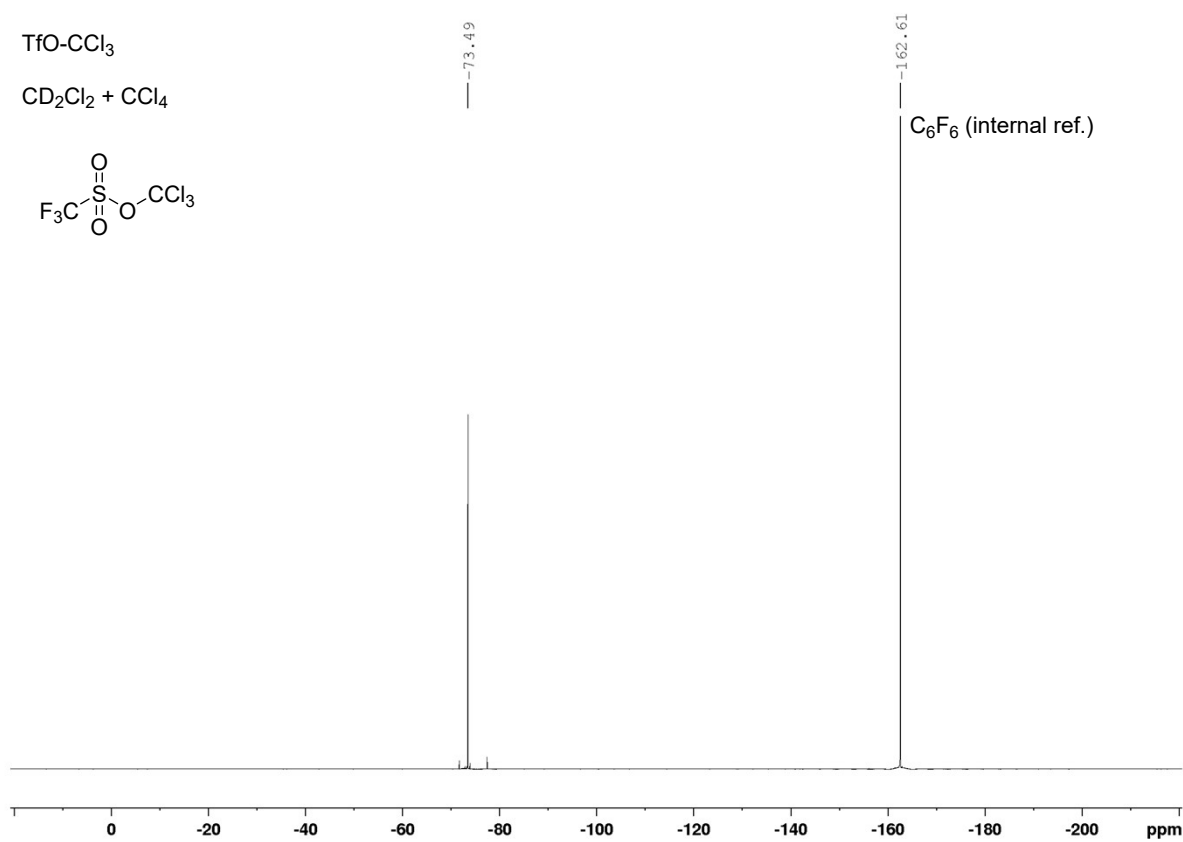

Figure S3. <sup>19</sup>F NMR (CD<sub>2</sub>Cl<sub>2</sub> + ~10 v% CCl<sub>4</sub>, 470 MHz): TfO-CCl<sub>3</sub>.

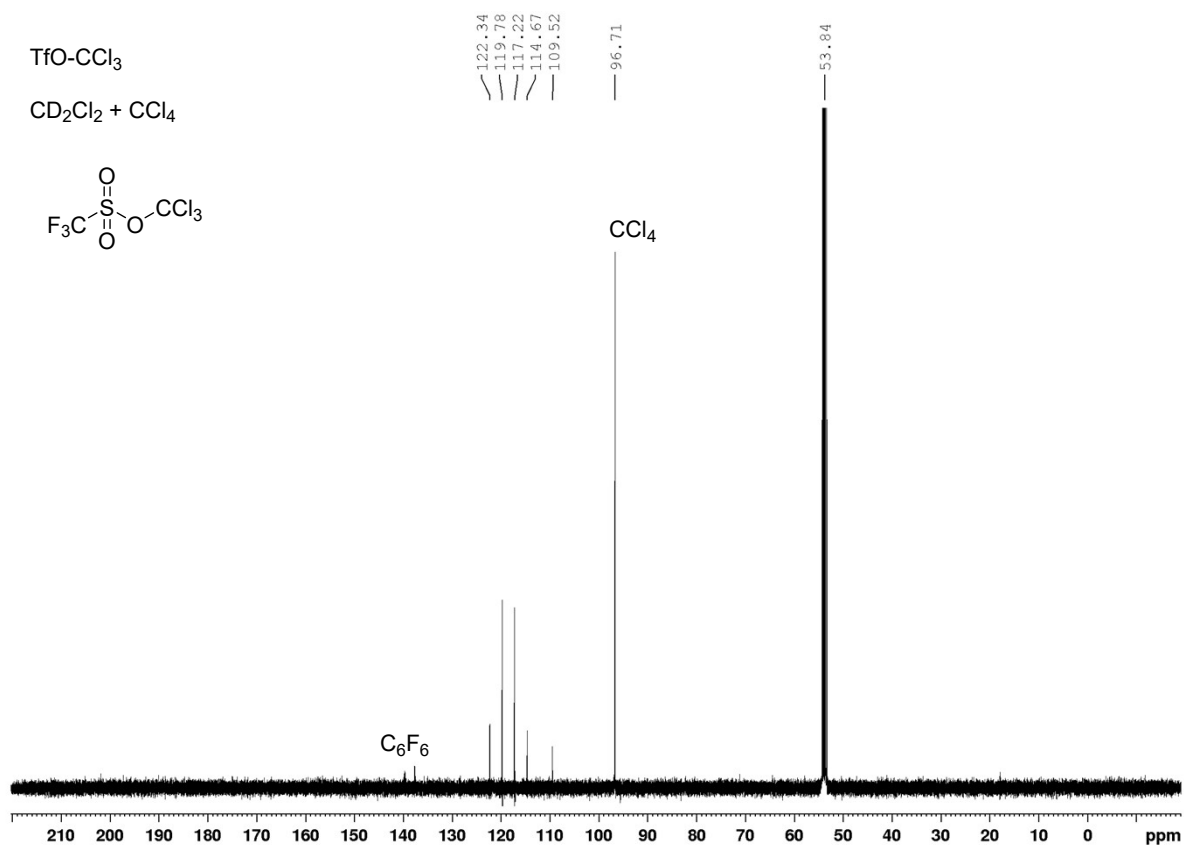

Figure S4. <sup>13</sup>C{<sup>1</sup>H} NMR (CD<sub>2</sub>Cl<sub>2</sub> + ~20 v% CCl<sub>4</sub>, 126 MHz): TfO-CCl<sub>3</sub>.

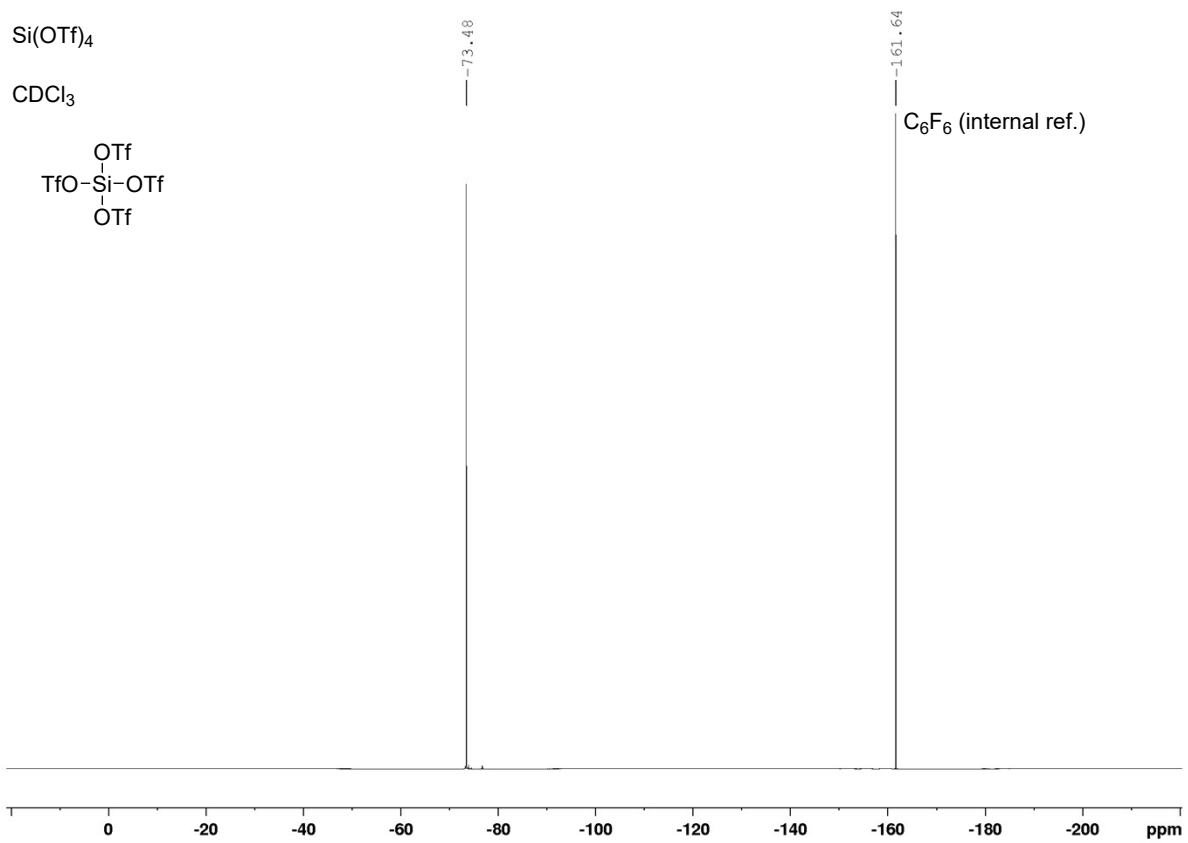

Figure S5. <sup>19</sup>F NMR (CDCl<sub>3</sub>, 470 MHz): Si(OTf)<sub>4</sub>.

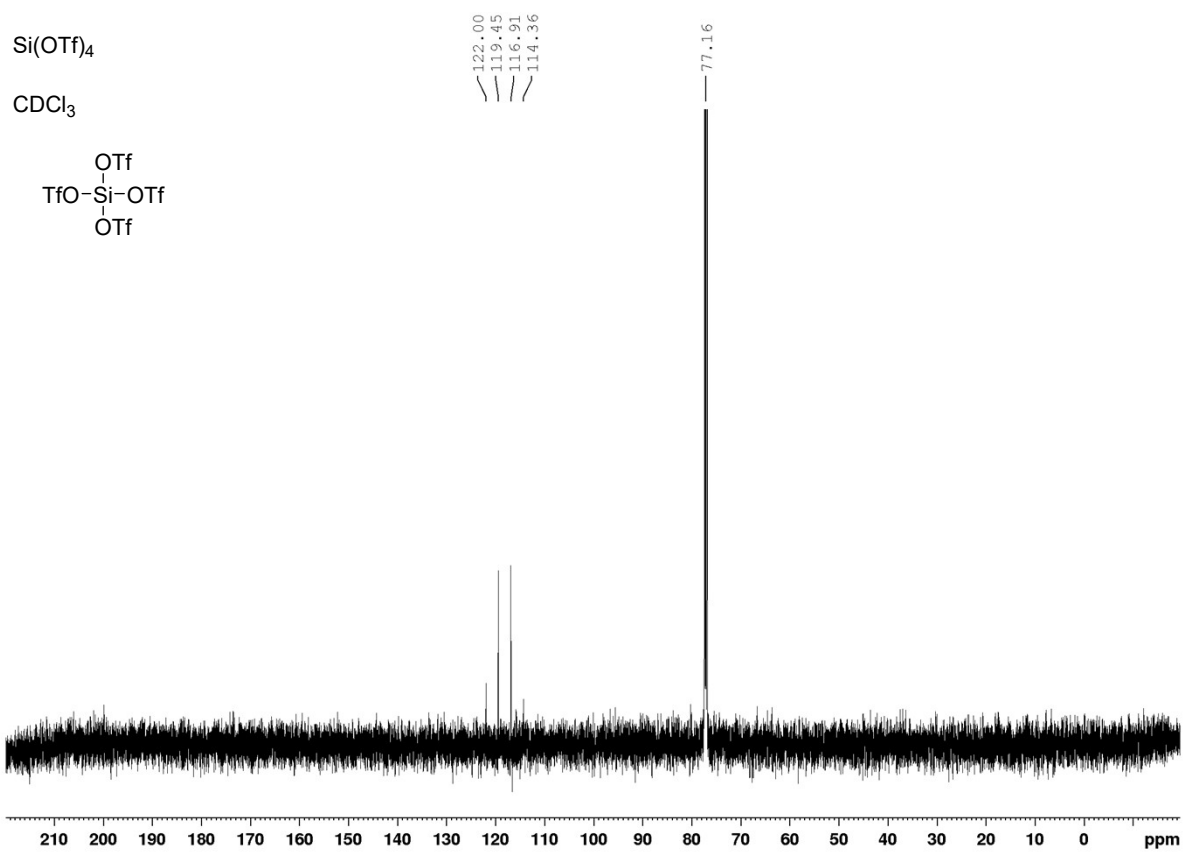

Figure S6. <sup>13</sup>C{<sup>1</sup>H} NMR (CDCl<sub>3</sub>, 126 MHz): Si(OTf)<sub>4</sub>.

Si(OTf)<sub>4</sub>

CDCl<sub>3</sub>

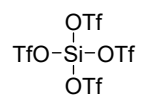

— -121.10

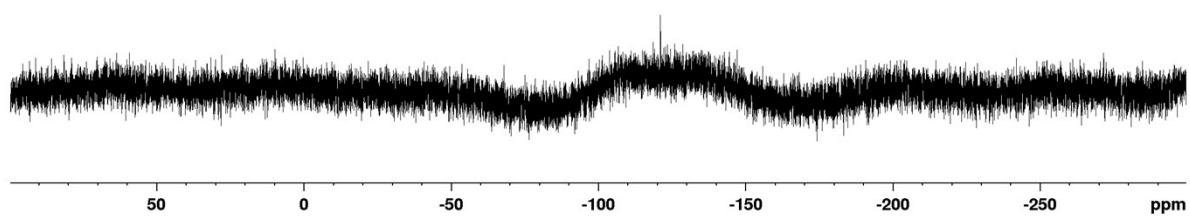

Figure S7. <sup>29</sup>Si{<sup>1</sup>H} NMR (CDCl<sub>3</sub>, 99 MHz): Si(OTf)<sub>4</sub>.

Cl<sub>4</sub>MeoCbIF<sub>2</sub>

CD<sub>2</sub>Cl<sub>2</sub>, PTFE tube

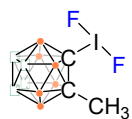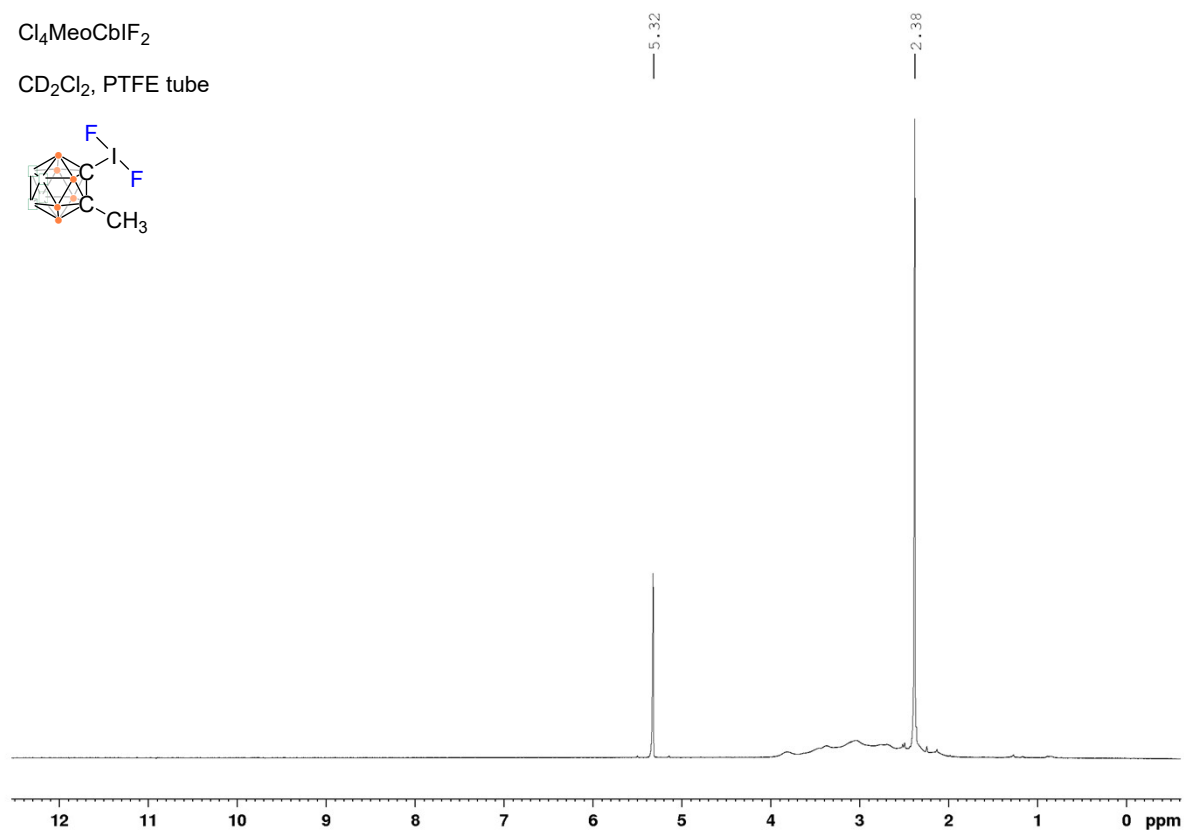

Figure S8. <sup>1</sup>H NMR (CD<sub>2</sub>Cl<sub>2</sub>, PTFE tube, 500 MHz): Cl<sub>4</sub>MeoCb-IF<sub>2</sub>.

Cl<sub>4</sub>MeoCbIF<sub>2</sub>

CD<sub>2</sub>Cl<sub>2</sub>, PTFE tube

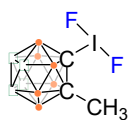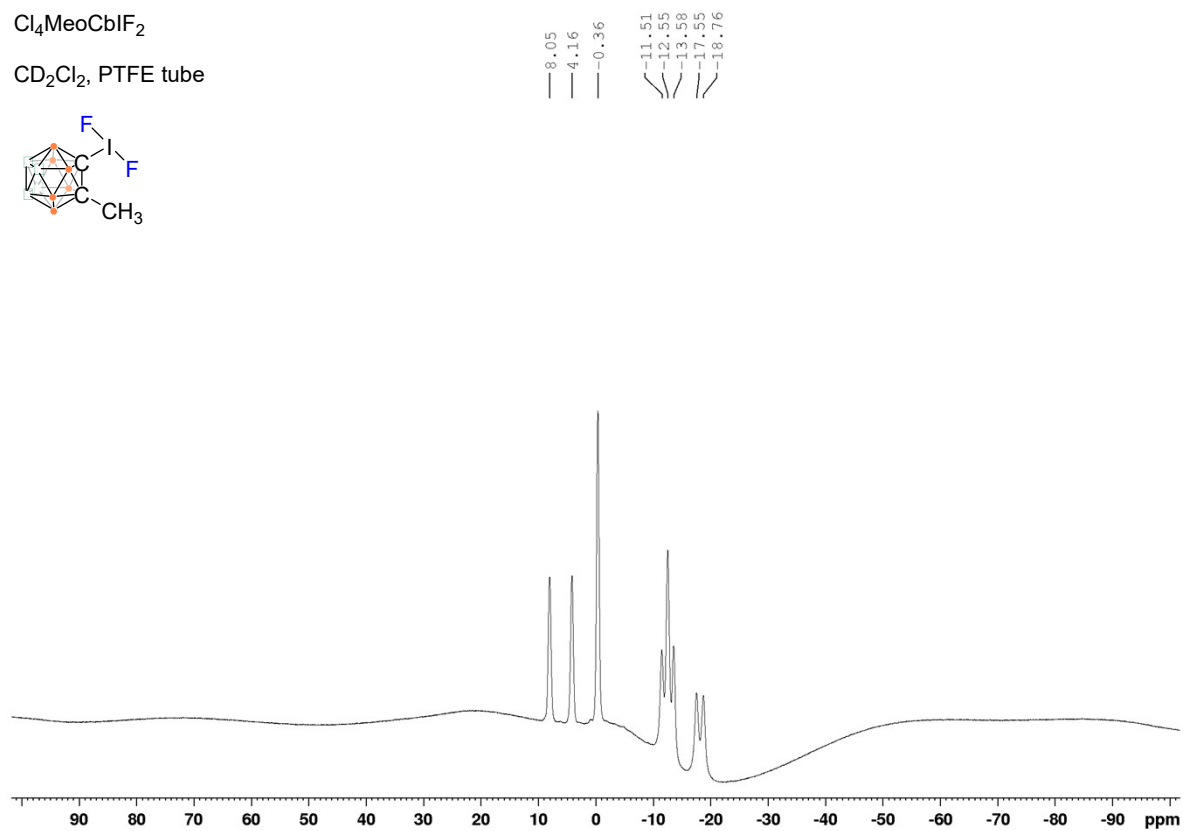

Figure S9. <sup>11</sup>B NMR (CD<sub>2</sub>Cl<sub>2</sub>, PTFE tube, 160 MHz): Cl<sub>4</sub>MeoCb-IF<sub>2</sub>.

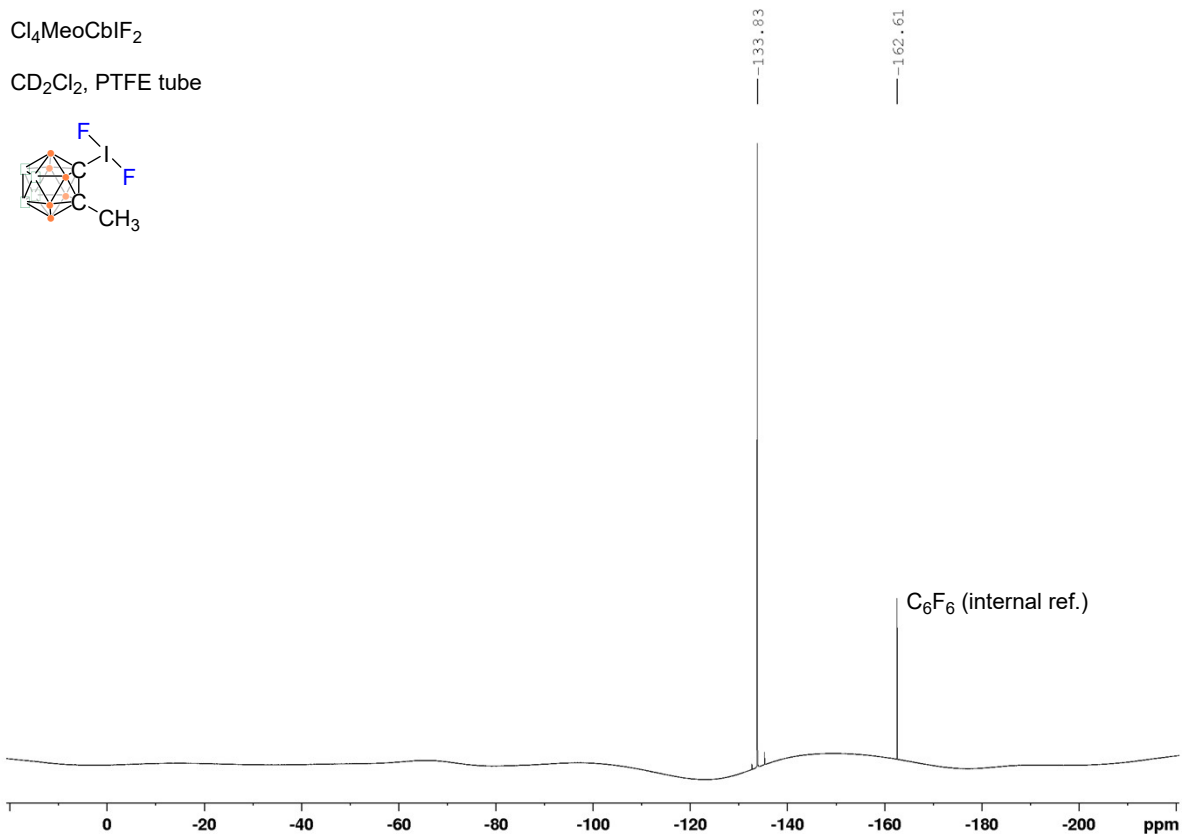

Figure S10. <sup>19</sup>F NMR (CD<sub>2</sub>Cl<sub>2</sub>, PTFE tube, 470 MHz): Cl<sub>4</sub>MeoCb-IF<sub>2</sub>.

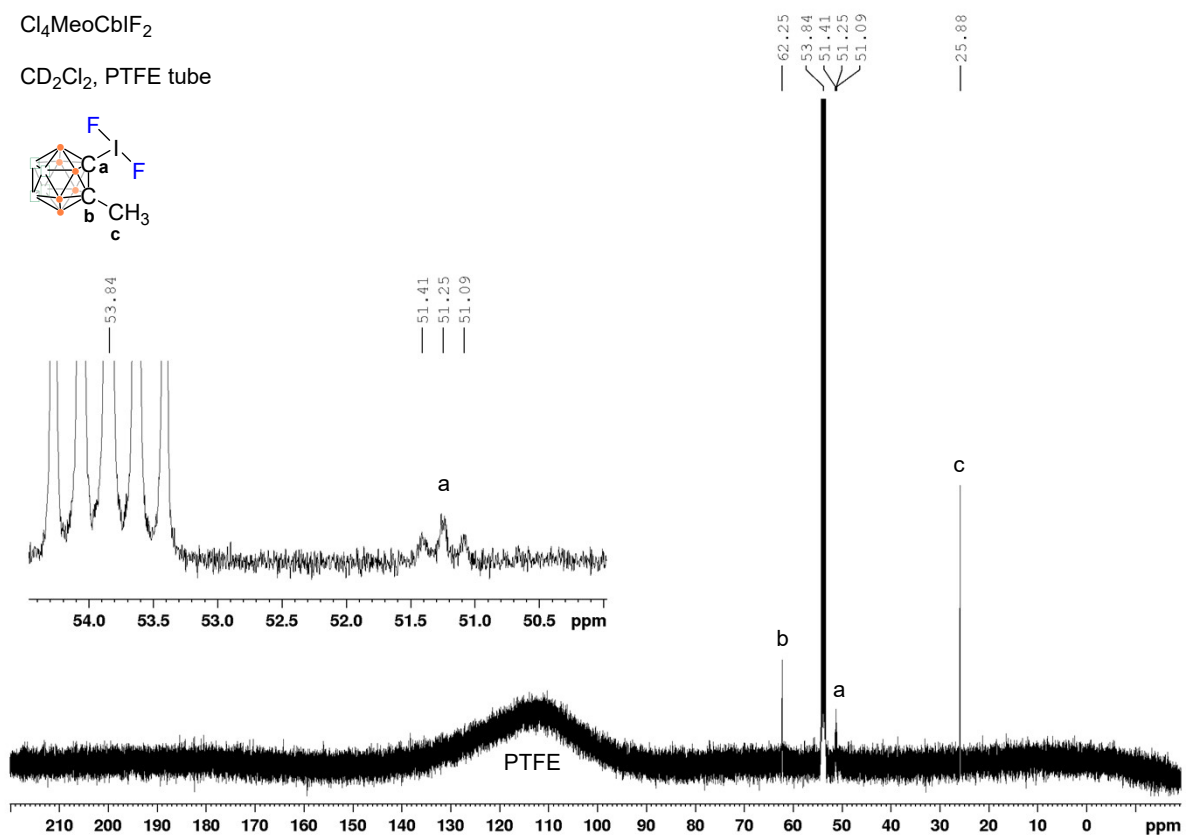

Figure S11. <sup>13</sup>C{<sup>1</sup>H} NMR (CD<sub>2</sub>Cl<sub>2</sub>, PTFE tube, 126 MHz): Cl<sub>4</sub>MeoCb-IF<sub>2</sub>.

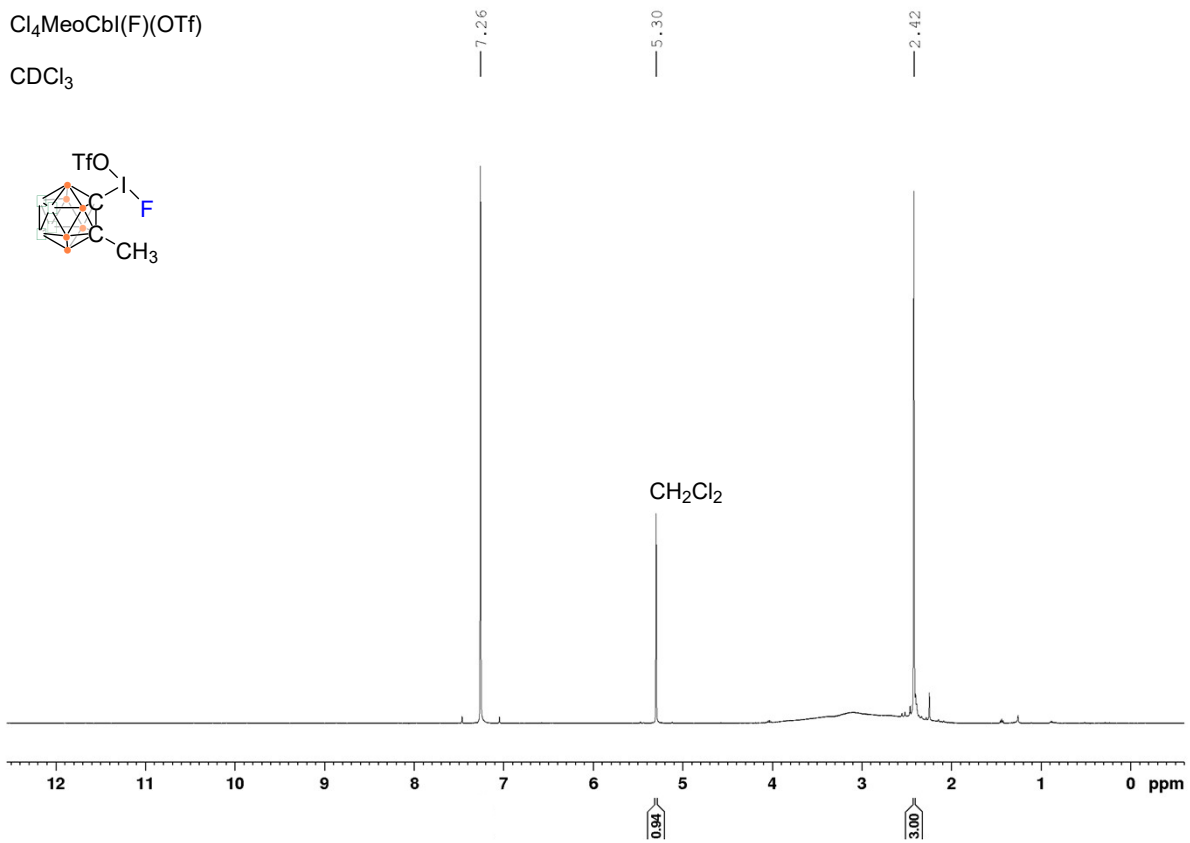

Figure S12. <sup>1</sup>H NMR (CDCl<sub>3</sub>, 500 MHz): Cl<sub>4</sub>MeoCb-I(F)(OTf).

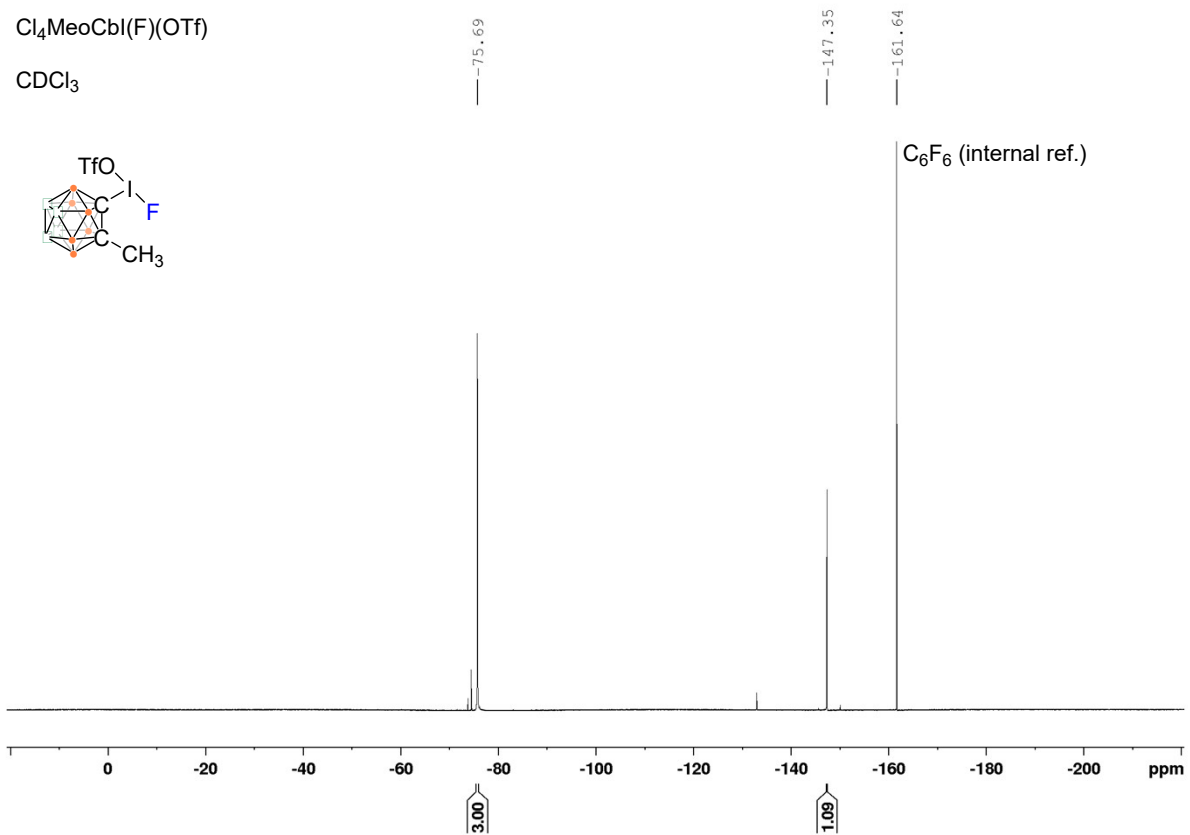

Figure S13. <sup>19</sup>F NMR (CDCl<sub>3</sub>, 470 MHz): Cl<sub>4</sub>MeoCb-I(F)(OTf). D1 set to 3 seconds.

Cl<sub>4</sub>MeoCbI(F)(OTf)

CDCl<sub>3</sub>

9.20  
4.94  
0.16  
-11.62  
-12.46  
-13.39  
-18.02  
-19.11

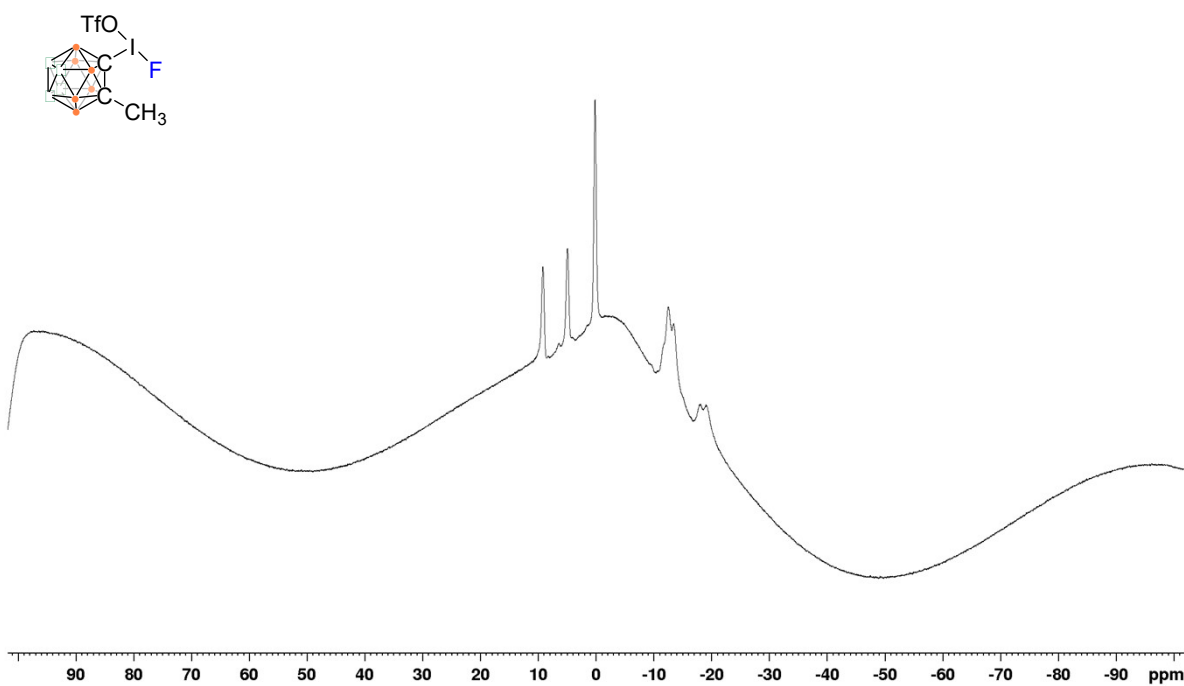

Figure S14. <sup>11</sup>B NMR (CDCl<sub>3</sub>, 160 MHz): Cl<sub>4</sub>MeoCb-I(F)(OTf).

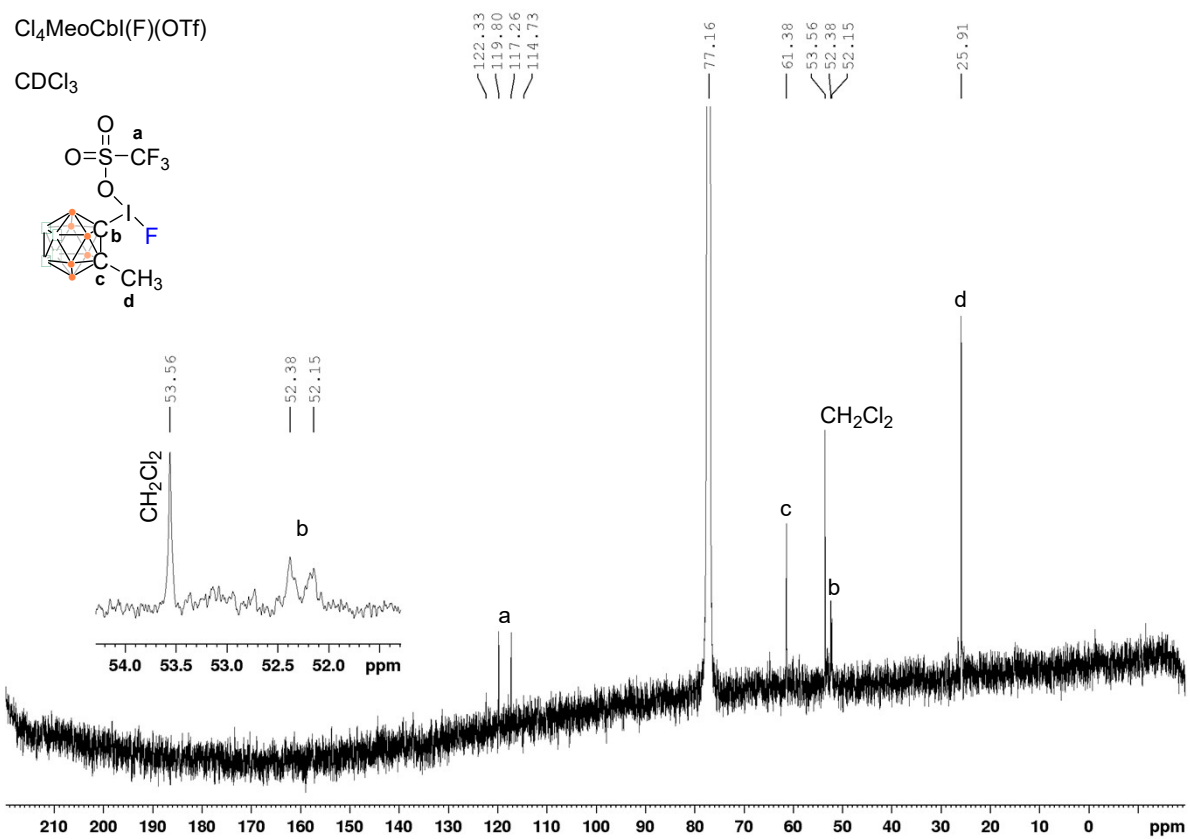

Figure S15.  $^{13}\text{C}\{^1\text{H}\}$  NMR ( $\text{CDCl}_3$ , 126 MHz):  $\text{Cl}_4\text{MeoCbl}(\text{F})(\text{OTf})$ . Line broadening set to 2 Hz to increase visibility of carbon **b**.

Cl<sub>4</sub>MeoCbl(F)(OTf)

CD<sub>2</sub>Cl<sub>2</sub>

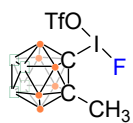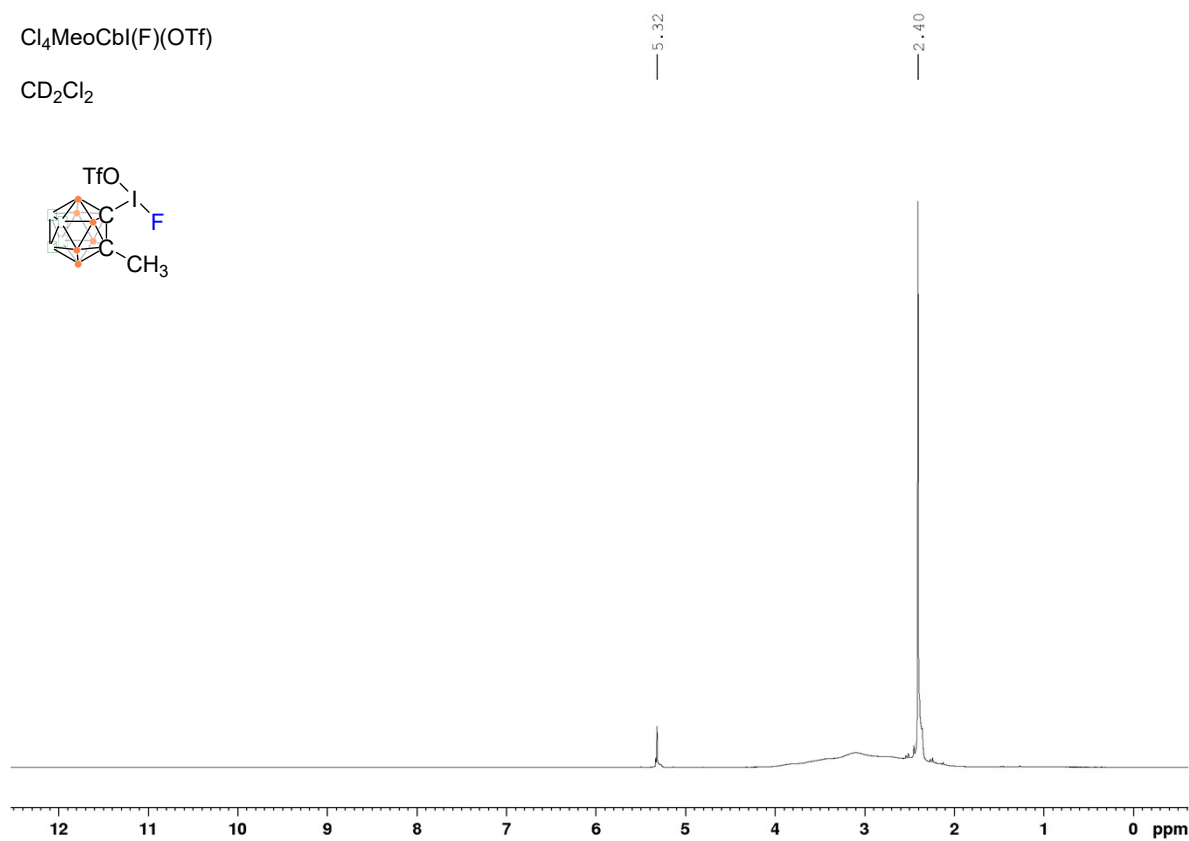

Figure S16. <sup>1</sup>H NMR (CD<sub>2</sub>Cl<sub>2</sub>, 500 MHz): Cl<sub>4</sub>MeoCb-I(F)(OTf).

Cl<sub>4</sub>MeoCbl(F)(OTf)

CD<sub>2</sub>Cl<sub>2</sub>

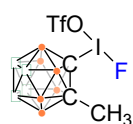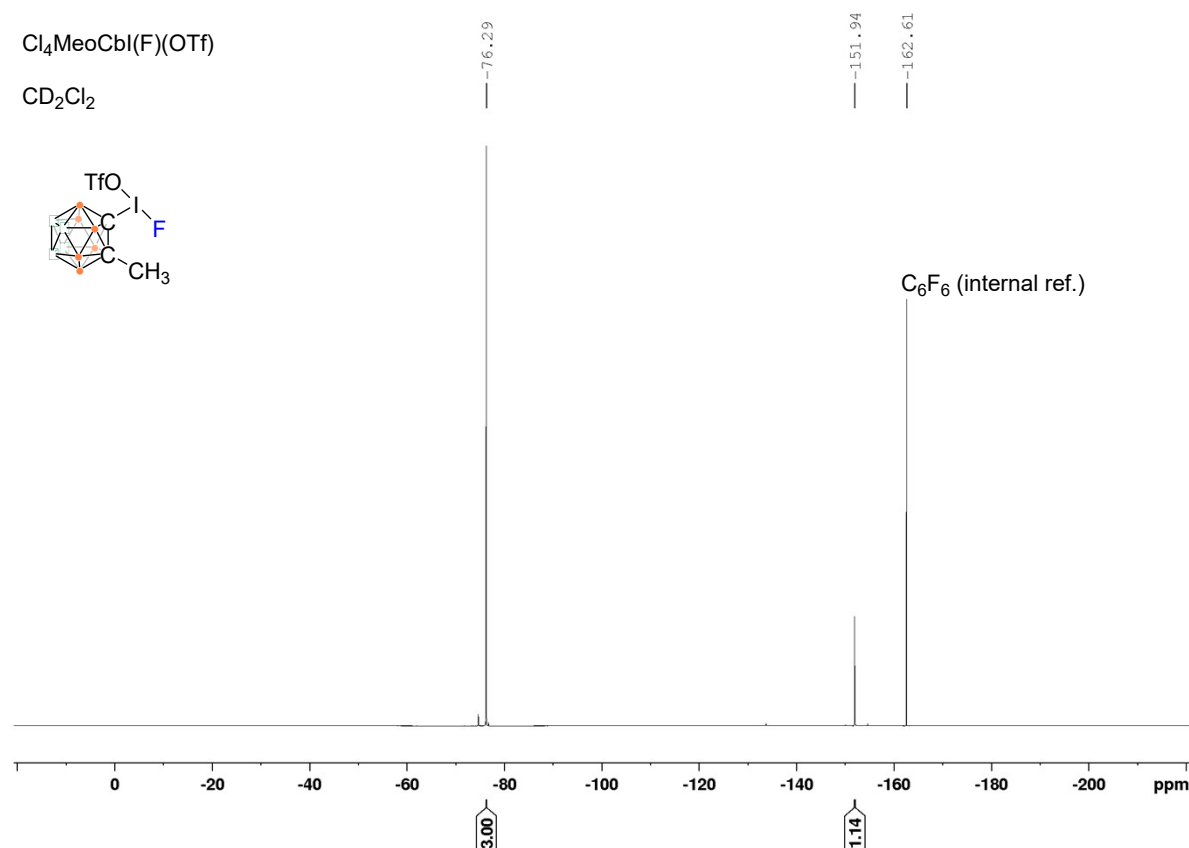

Figure S17. <sup>19</sup>F NMR (CD<sub>2</sub>Cl<sub>2</sub>, 470 MHz): Cl<sub>4</sub>MeoCb-I(F)(OTf). D1 set to 3 seconds.

Cl<sub>4</sub>MeoCbl(F)(OTf)

CD<sub>2</sub>Cl<sub>2</sub>

8.90  
4.63  
0.03  
-12.33  
-17.76  
-18.83

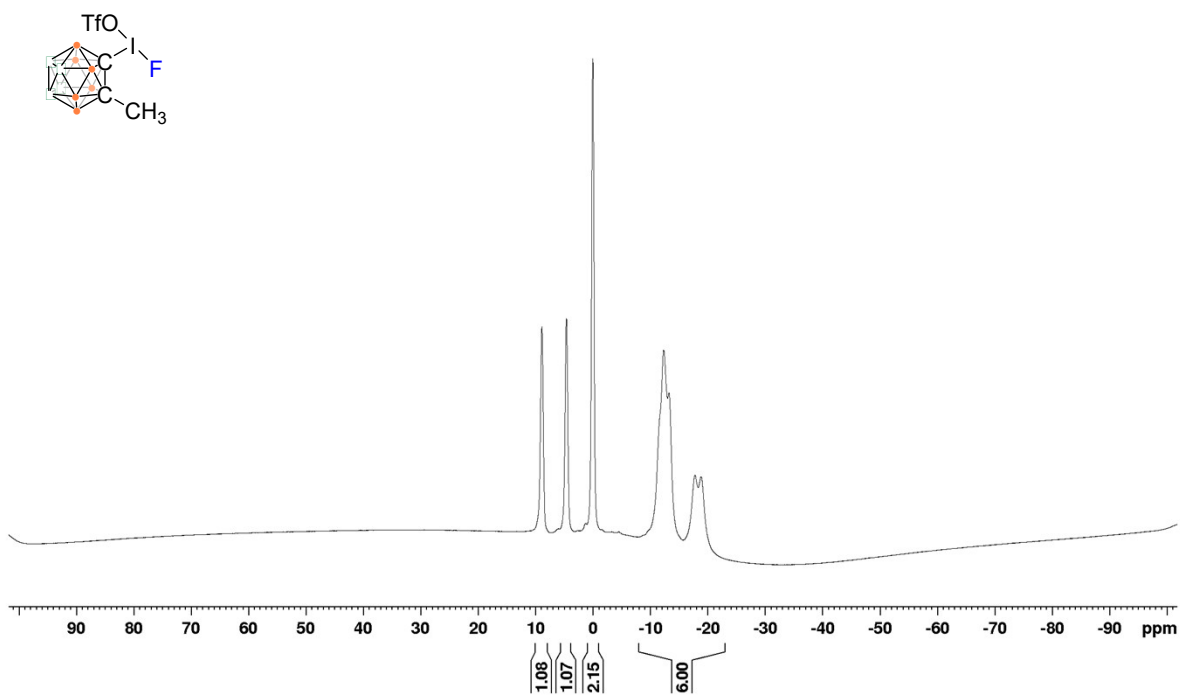

Figure S18. <sup>11</sup>B NMR (CD<sub>2</sub>Cl<sub>2</sub>, 160 MHz): Cl<sub>4</sub>MeoCb-I(F)(OTf). Integrals use baseline correction.

Cl<sub>4</sub>MeoCbl(F)(OTf)

CD<sub>2</sub>Cl<sub>2</sub>

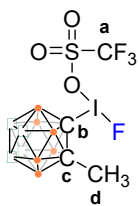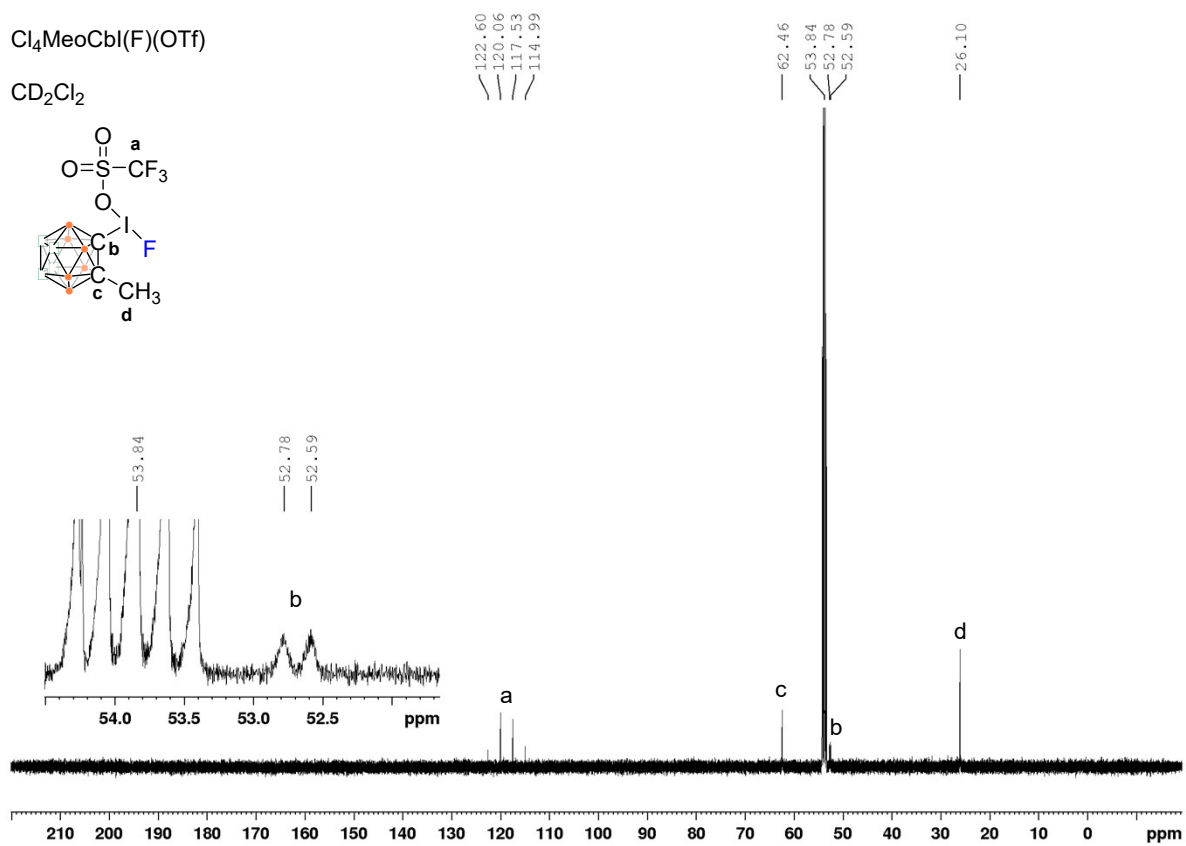

Figure S19. <sup>13</sup>C{<sup>1</sup>H} NMR (CD<sub>2</sub>Cl<sub>2</sub>, 126 MHz): Cl<sub>4</sub>MeoCbl-(F)(OTf).

$\text{Cl}_4\text{MeoCbI}(\text{OTf})_2$

$\text{CD}_2\text{Cl}_2$

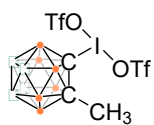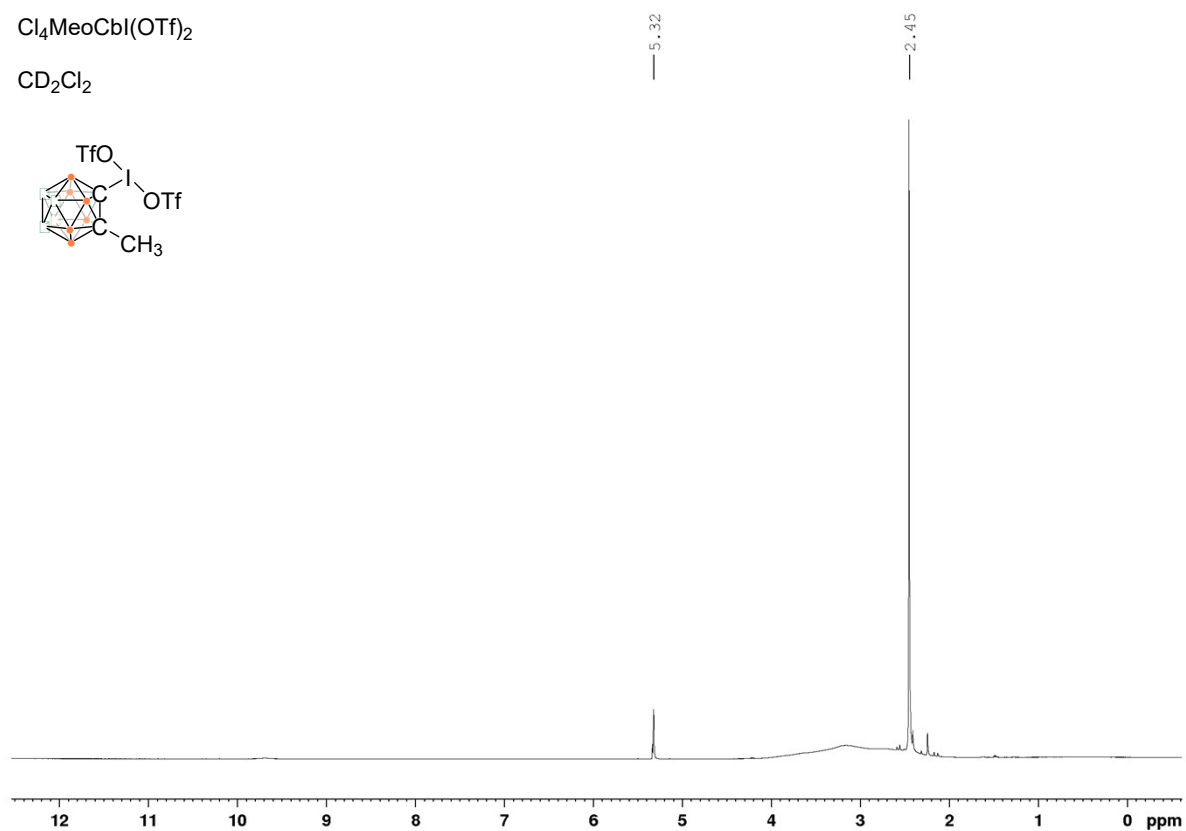

Figure S20. <sup>1</sup>H NMR ( $\text{CD}_2\text{Cl}_2$ , 500 MHz):  $\text{Cl}_4\text{MeoCbI}(\text{OTf})_2$ .

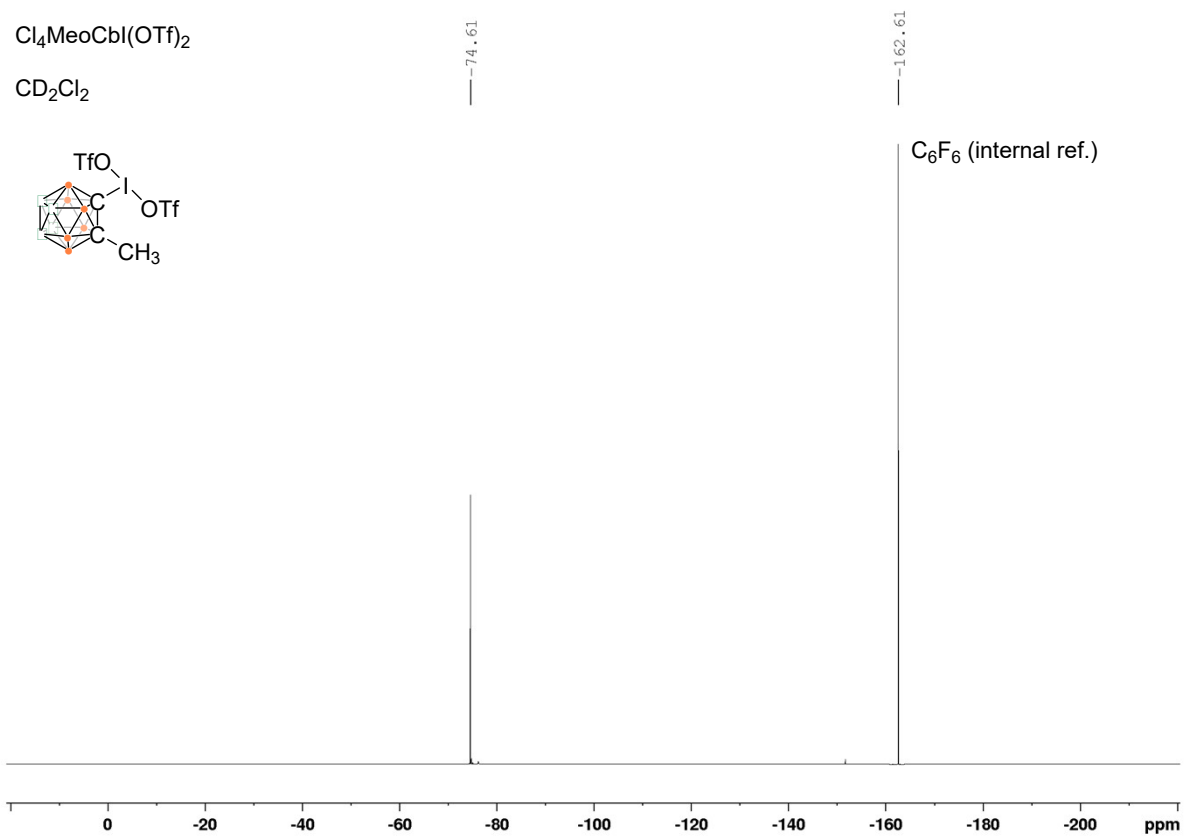

Figure S21.  $^{19}\text{F}$  NMR ( $\text{CD}_2\text{Cl}_2$ , 470 MHz):  $\text{Cl}_4\text{MeoCb-I}(\text{OTf})_2$ .

Cl<sub>4</sub>MeoCbl(OTf)<sub>2</sub>

CD<sub>2</sub>Cl<sub>2</sub>

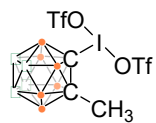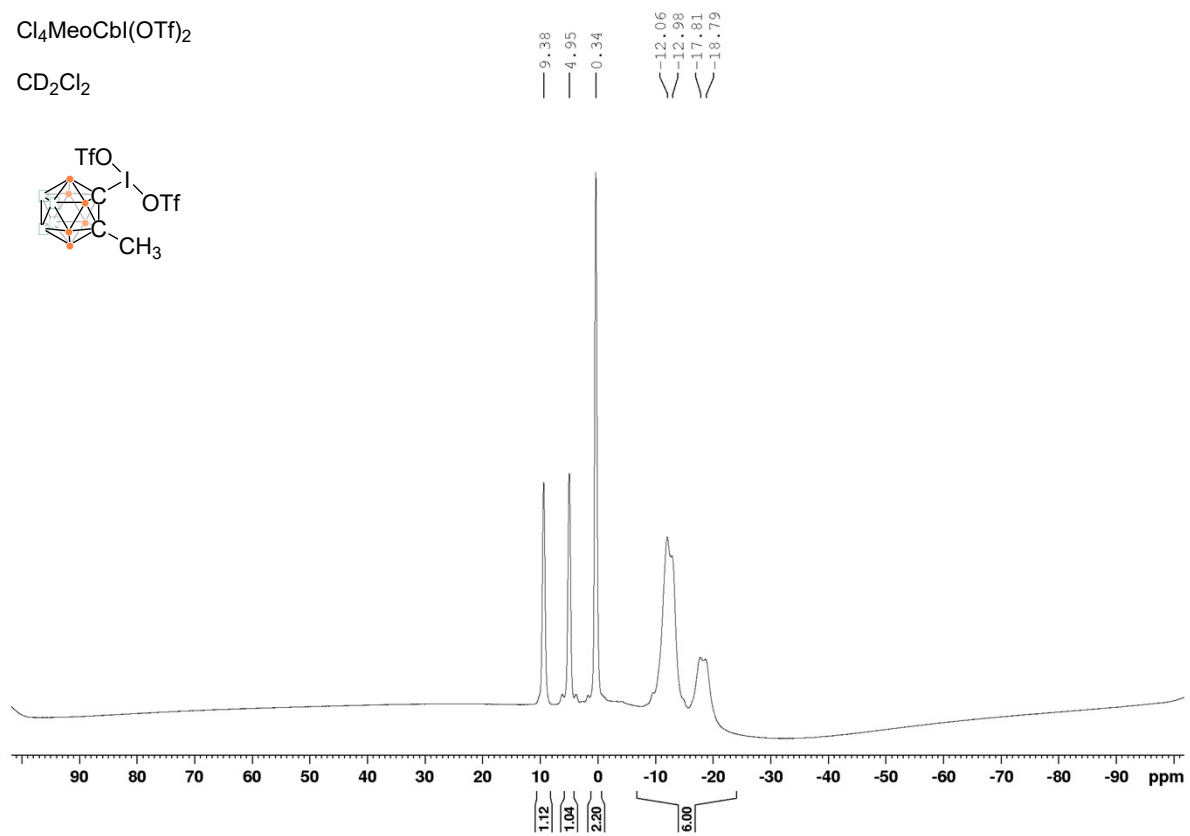

Figure S22. <sup>11</sup>B NMR (CD<sub>2</sub>Cl<sub>2</sub>, 160 MHz): Cl<sub>4</sub>MeoCb-I(OTf)<sub>2</sub>. Integrals use baseline correction.

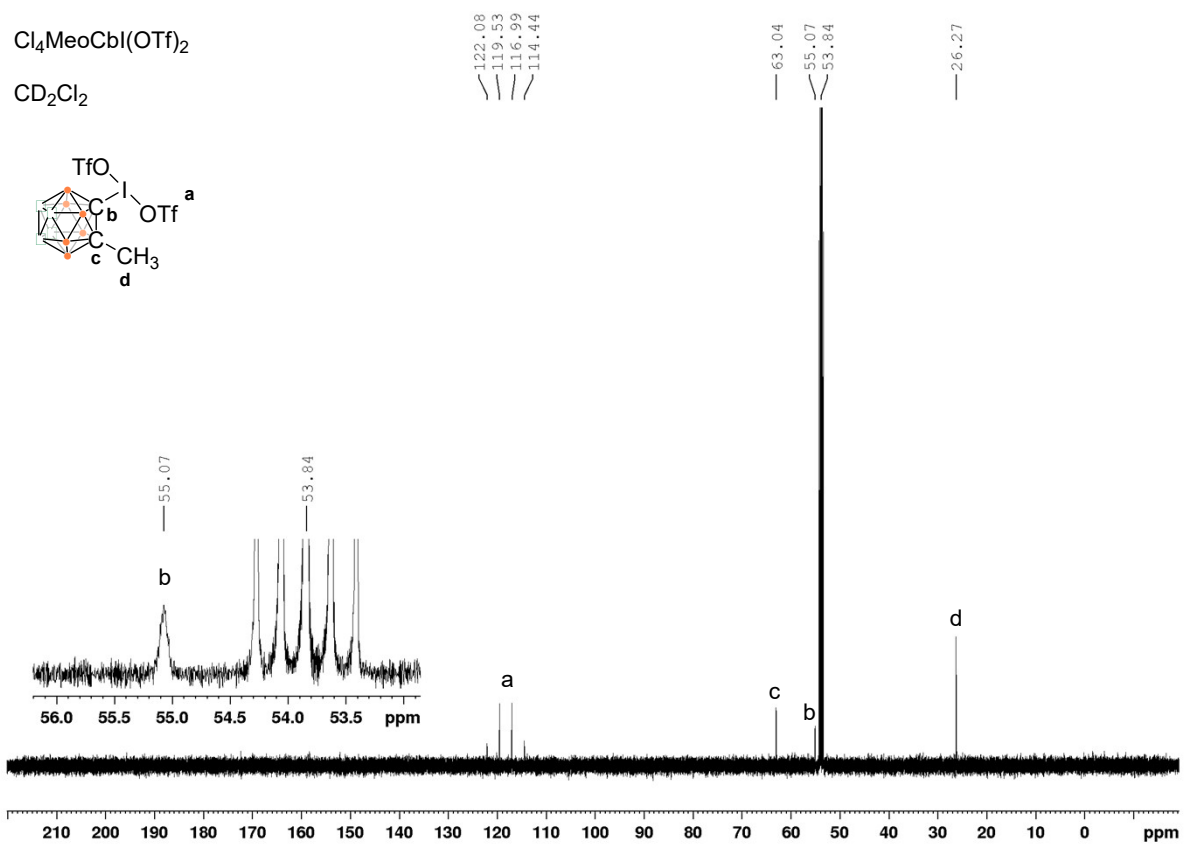

Figure S23.  $^{13}\text{C}\{^1\text{H}\}$  NMR ( $\text{CD}_2\text{Cl}_2$ , 126 MHz):  $\text{Cl}_4\text{MeoCb-I}(\text{OTf})_2$ .

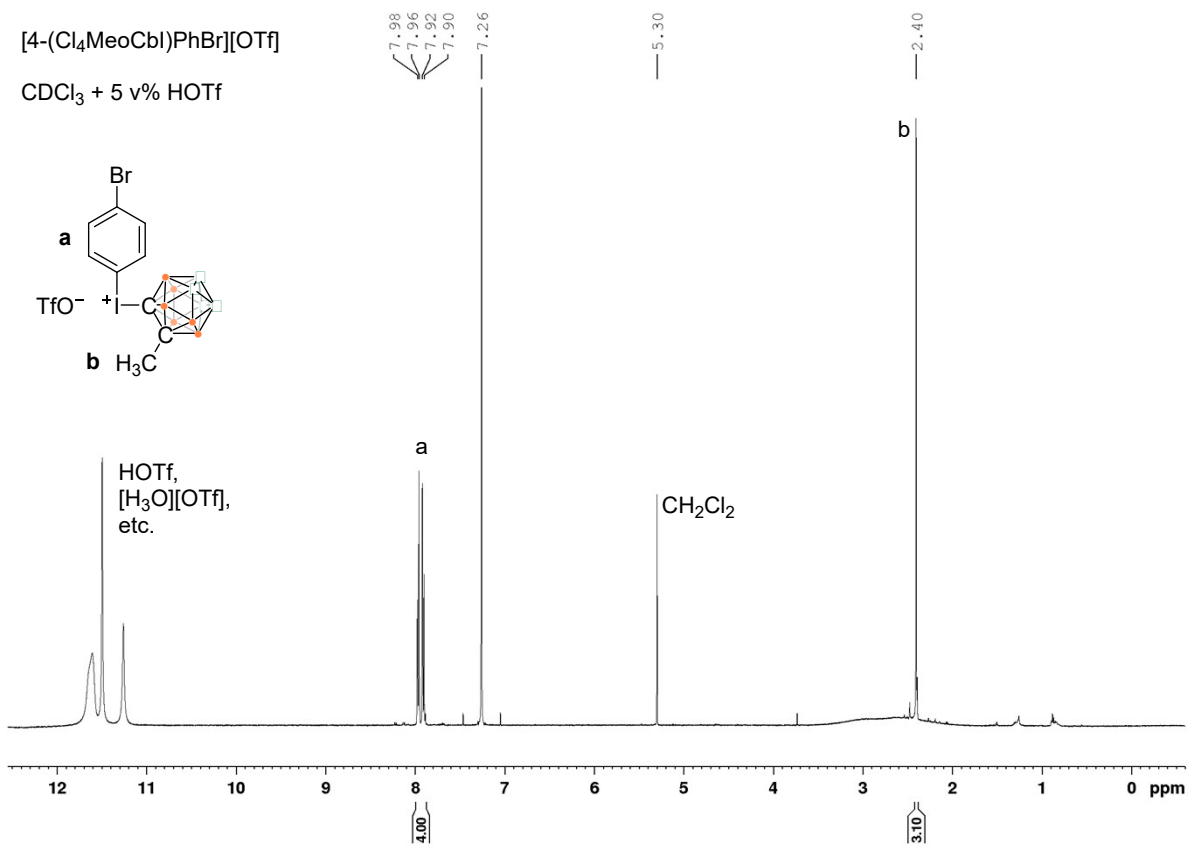

Figure S24. <sup>1</sup>H NMR (CDCl<sub>3</sub> + 5 v% HOTf, 500 MHz): [4-(Cl<sub>4</sub>MeoCbl)PhBr][OTf].

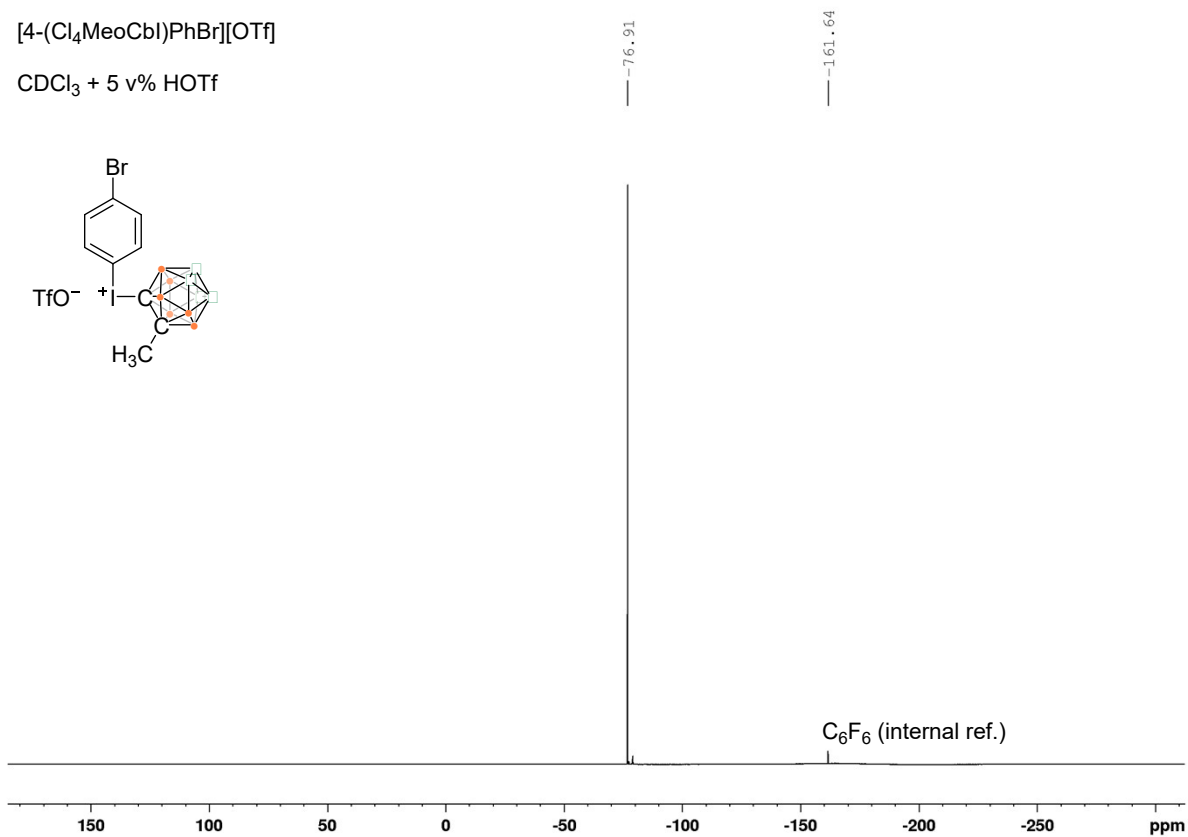

Figure S25. <sup>19</sup>F NMR (CDCl<sub>3</sub> + 5 v% HOTf, 376 MHz): [4-(Cl<sub>4</sub>MeoCbl)PhBr][OTf].

[4-(Cl<sub>4</sub>MeoCbl)PhBr][OTf]

CDCl<sub>3</sub> + 5 v% HOTf

8.66  
4.35  
0.74  
-13.08  
-18.47

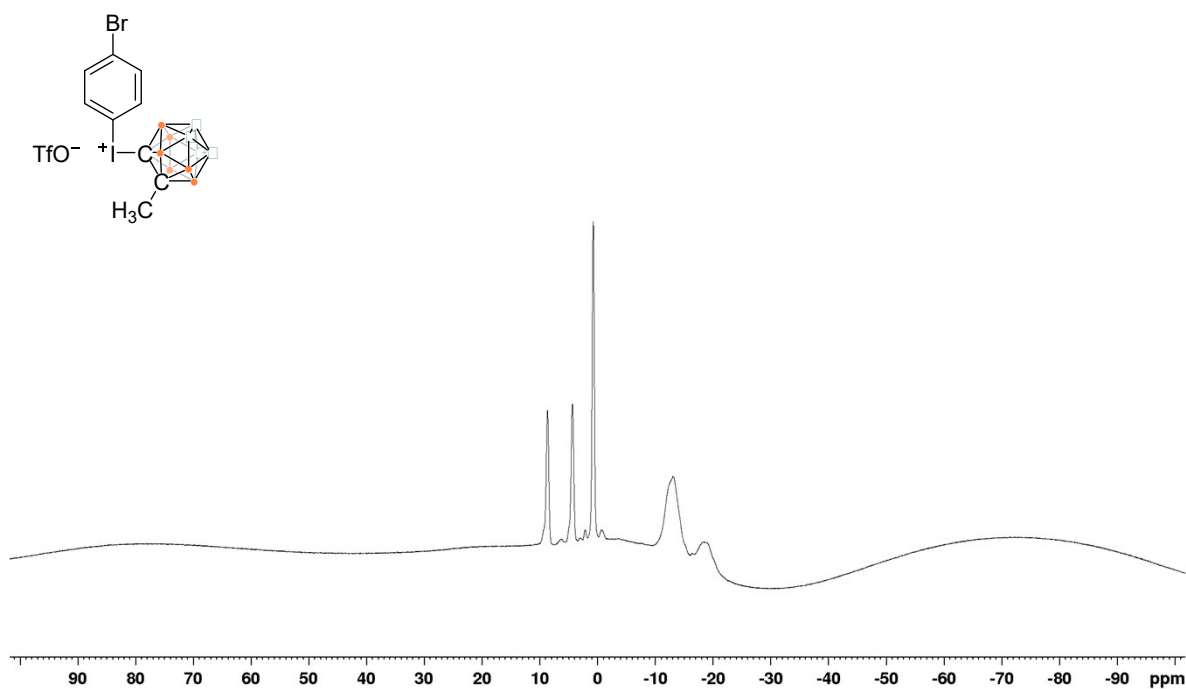

Figure S26. <sup>11</sup>B NMR (CDCl<sub>3</sub> + 5 v% HOTf, 160 MHz): [4-(Cl<sub>4</sub>MeoCbl)PhBr][OTf].

[4-(Cl<sub>4</sub>MeoCbl)PhBr][OTf]

CDCl<sub>3</sub> + 5 v% HOTf

138.48  
137.68  
133.88  
122.37  
119.85  
117.32  
114.80  
112.71  
77.16  
59.82  
32.82  
25.37

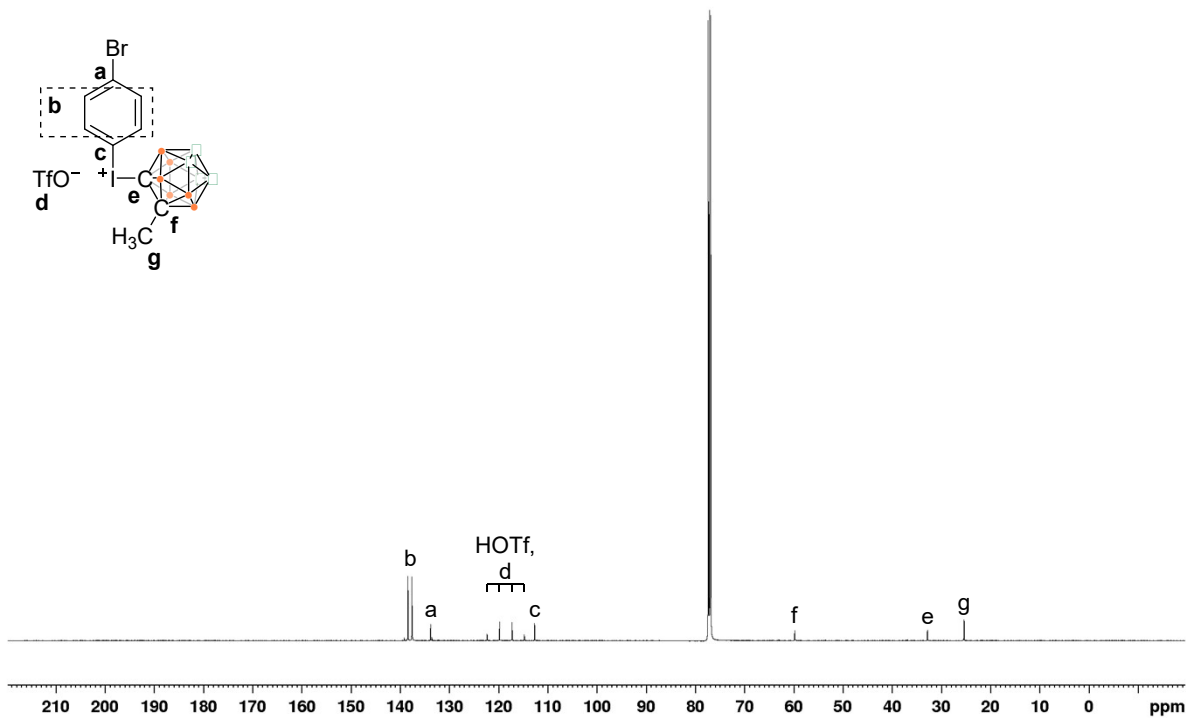

Figure S27. <sup>13</sup>C{<sup>1</sup>H} NMR (CDCl<sub>3</sub> + 5 v% HOTf, 126 MHz): [4-(Cl<sub>4</sub>MeoCbl)PhBr][OTf].

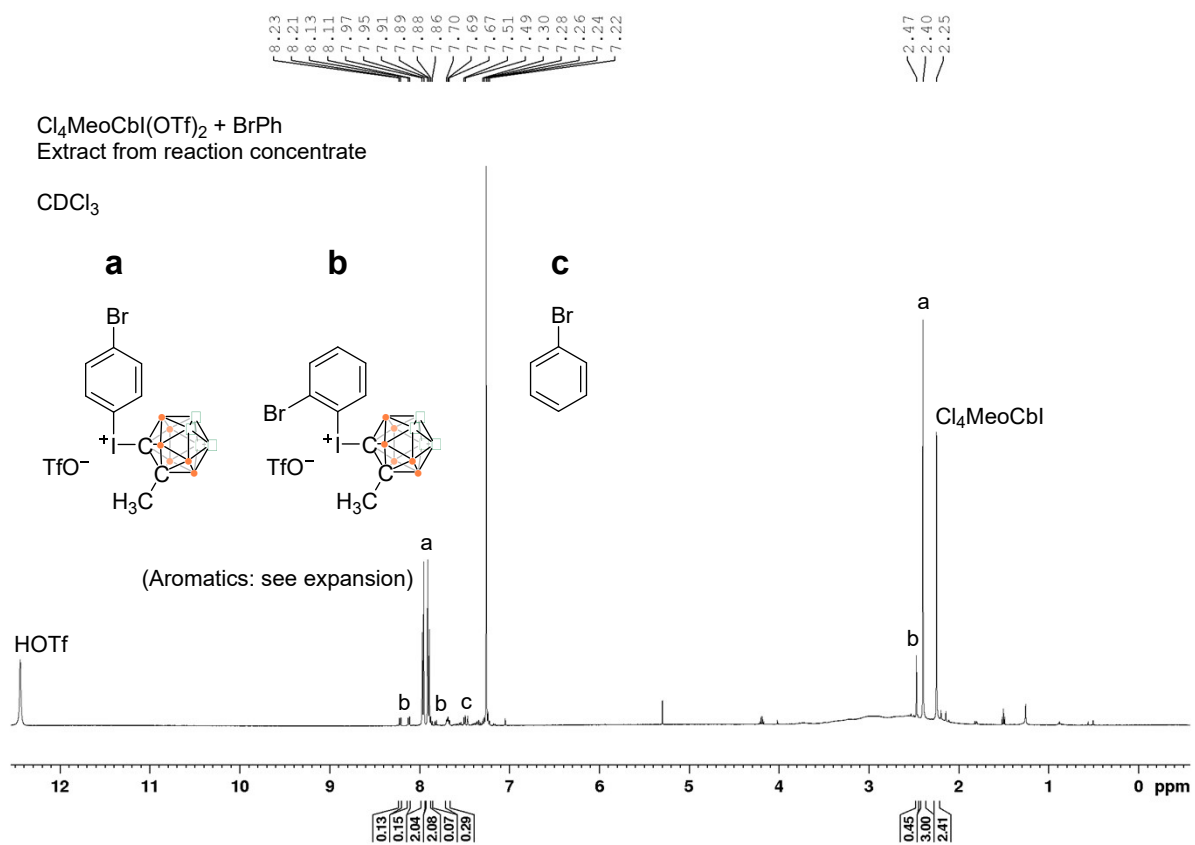

Figure S28.  $^1\text{H}$  NMR ( $\text{CDCl}_3$ , 500 MHz): Unoptimized (room temperature) reaction of  $\text{Cl}_4\text{MeoCbI}(\text{OTf})_2$  with  $\text{BrPh}$ , showing the o-isomer (b). Spectrum 1 of 2 (full).

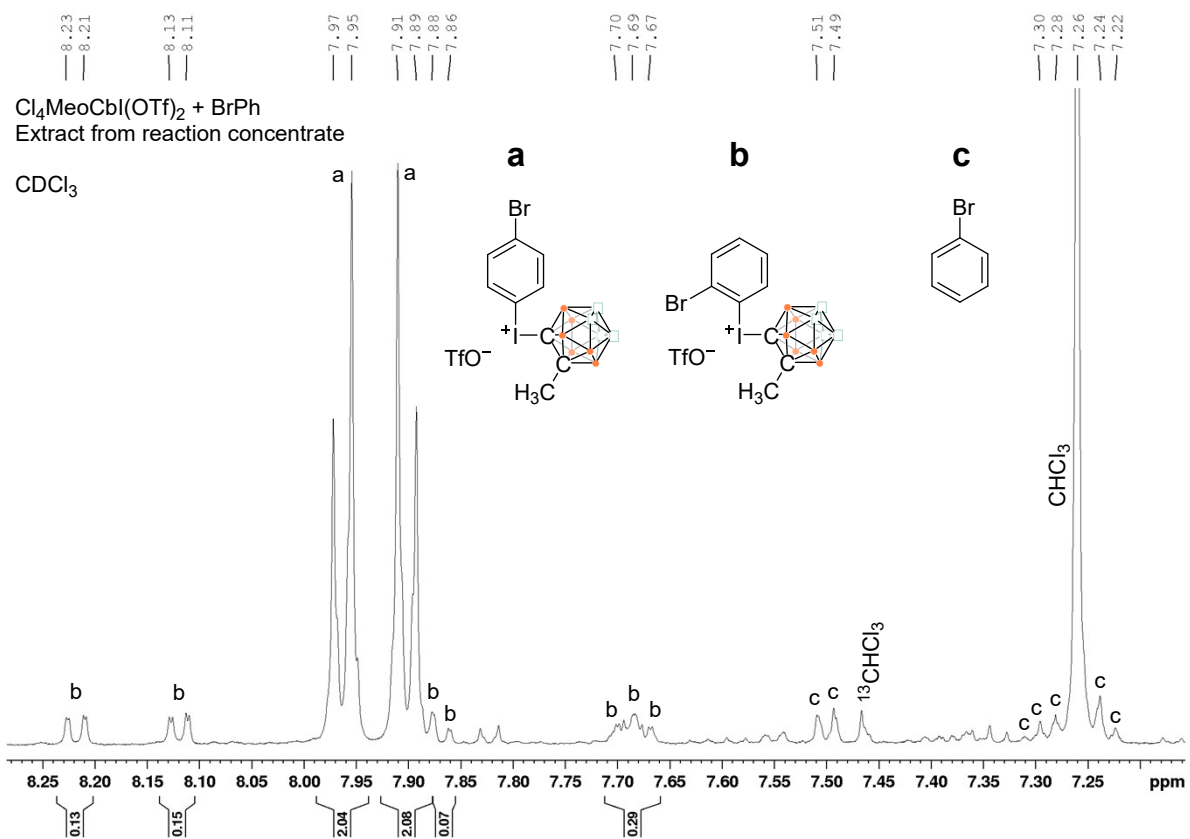

Figure S29.  $^1\text{H}$  NMR ( $\text{CDCl}_3$ , 500 MHz): Unoptimized (room temperature) reaction of  $\text{Cl}_4\text{MeoCb-I}(\text{OTf})_2$  with BrPh, showing the o-isomer (b). Spectrum 2 of 2 (aromatics expansion).

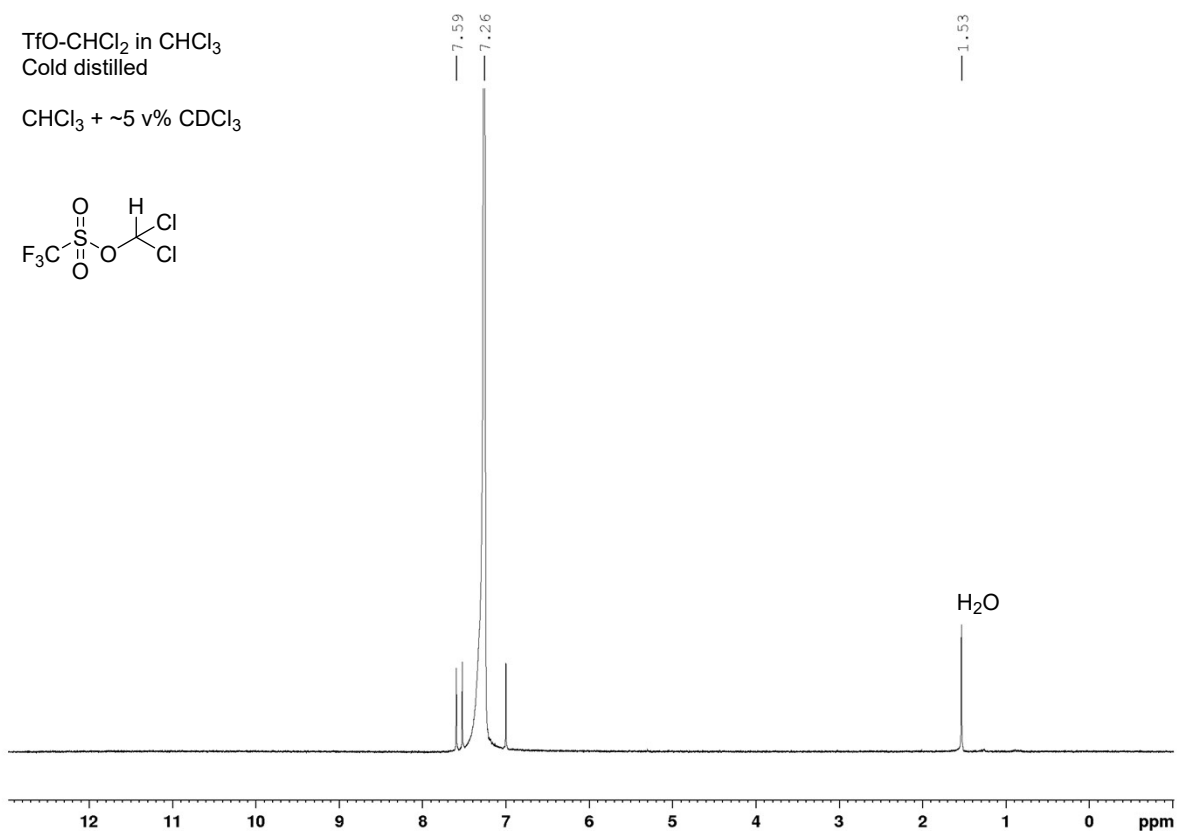

Figure S30. <sup>1</sup>H NMR (CHCl<sub>3</sub> + ~5 v% CDCl<sub>3</sub>, 400 MHz): TfO-CHCl<sub>2</sub> isolated in CHCl<sub>3</sub>.

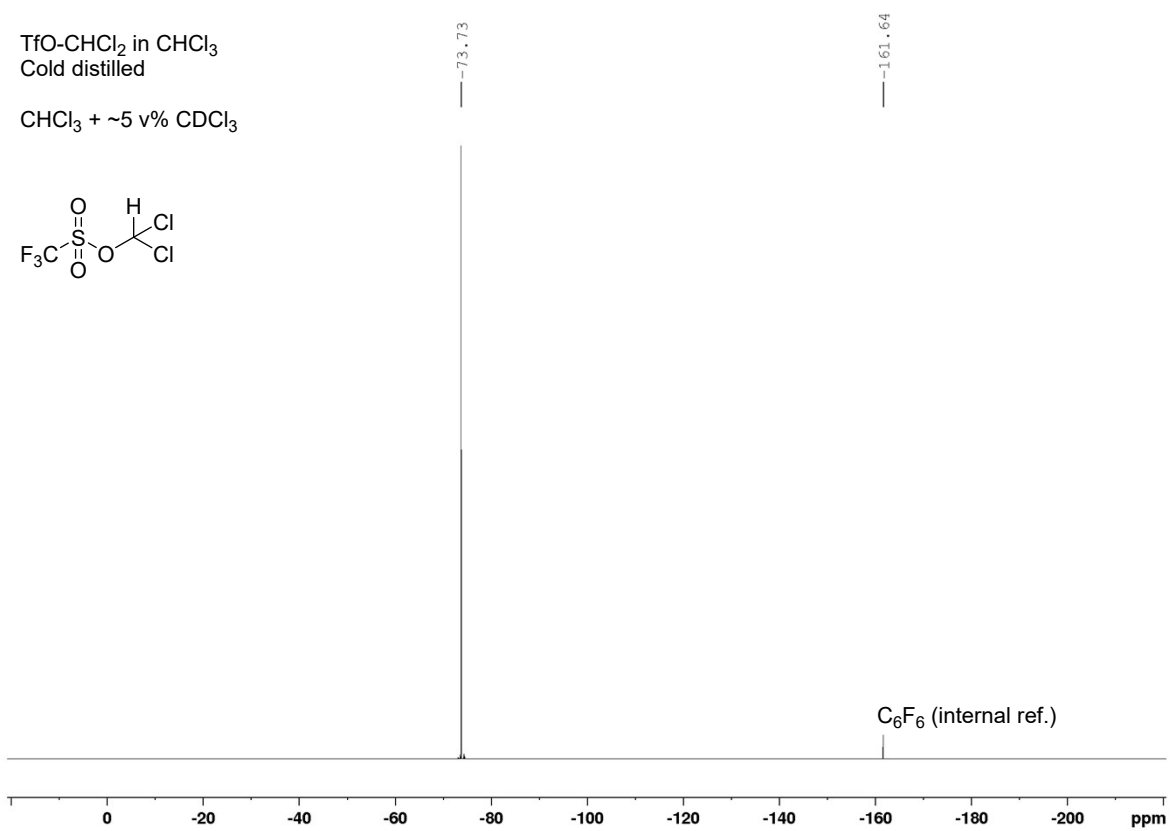

Figure S31. <sup>19</sup>F NMR (CHCl<sub>3</sub> + ~5 v% CDCl<sub>3</sub>, 470 MHz): TfO-CHCl<sub>2</sub> isolated in CHCl<sub>3</sub>.

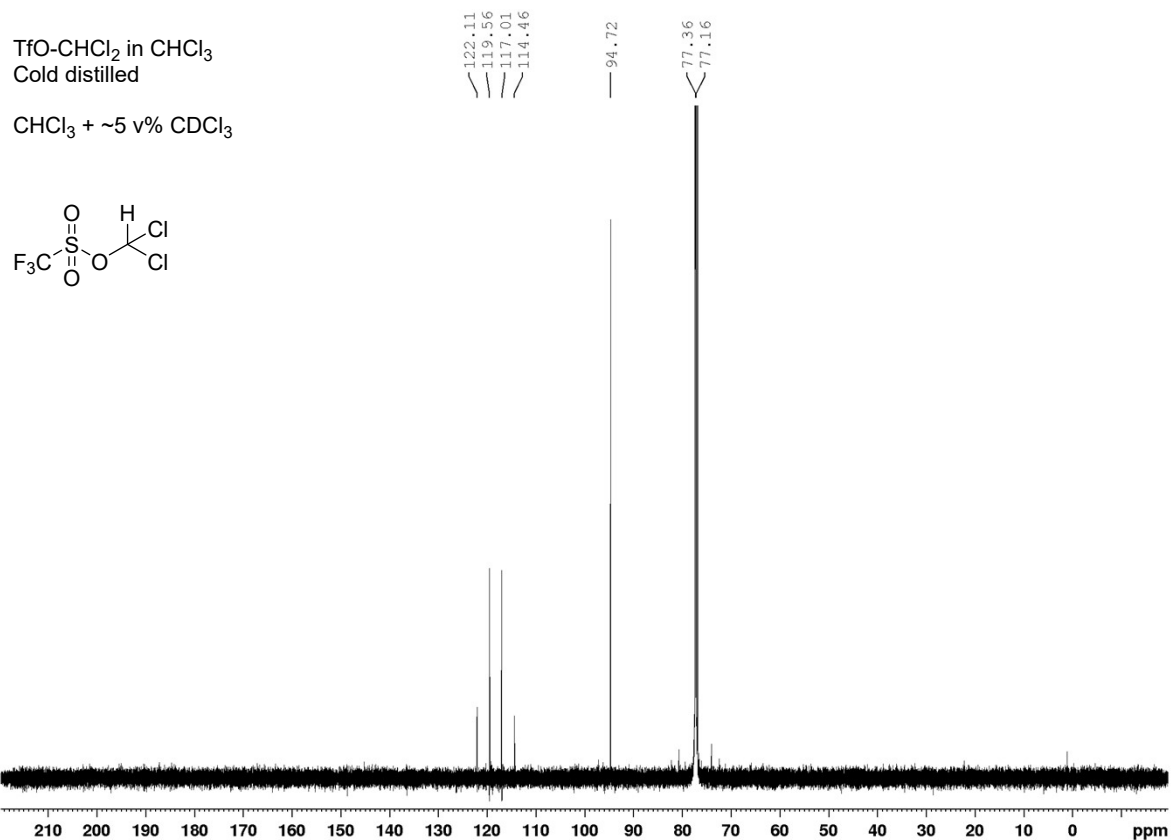

Figure S32. <sup>13</sup>C{<sup>1</sup>H} NMR (CHCl<sub>3</sub> + ~ 5 v% CDCl<sub>3</sub>, 126 MHz): TfO-CHCl<sub>2</sub> isolated in CHCl<sub>3</sub>.

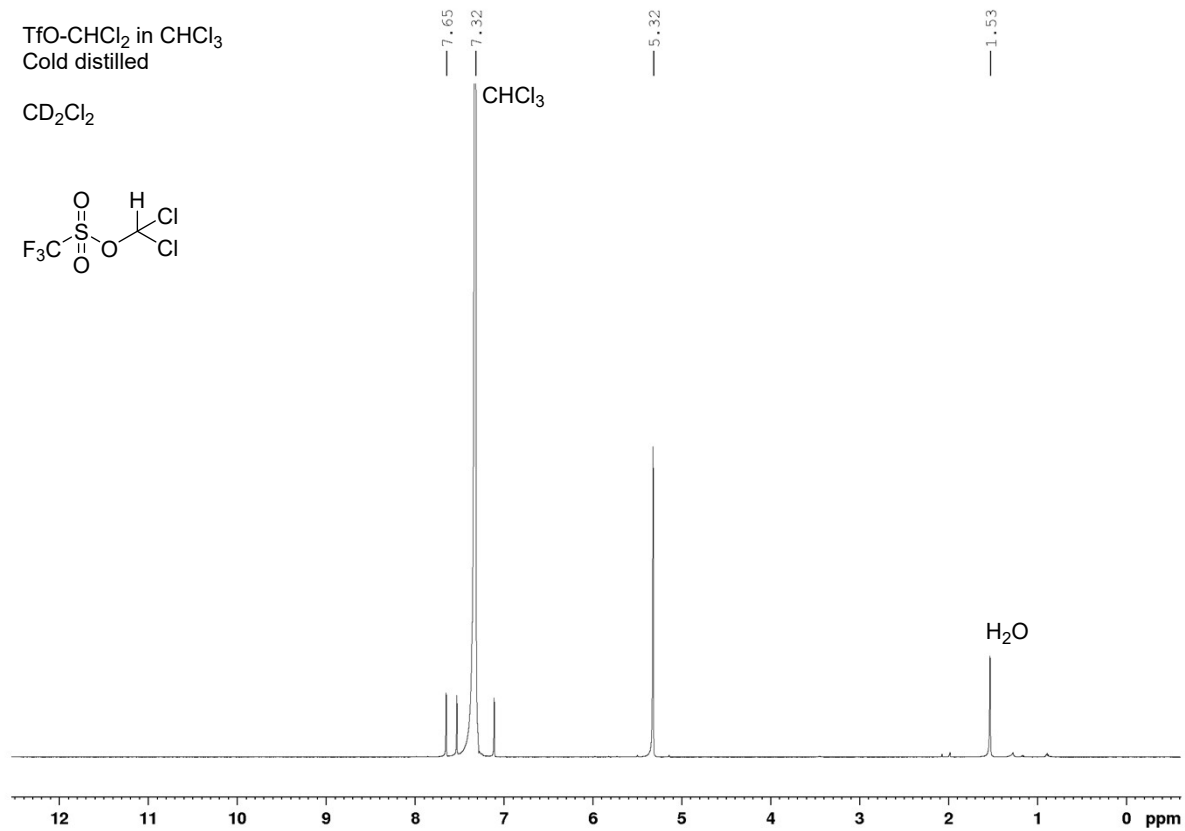

Figure S33. <sup>1</sup>H NMR (CD<sub>2</sub>Cl<sub>2</sub> + ~5 v% CHCl<sub>3</sub>, 500 MHz): TfO-CHCl<sub>2</sub> isolated in CHCl<sub>3</sub>.

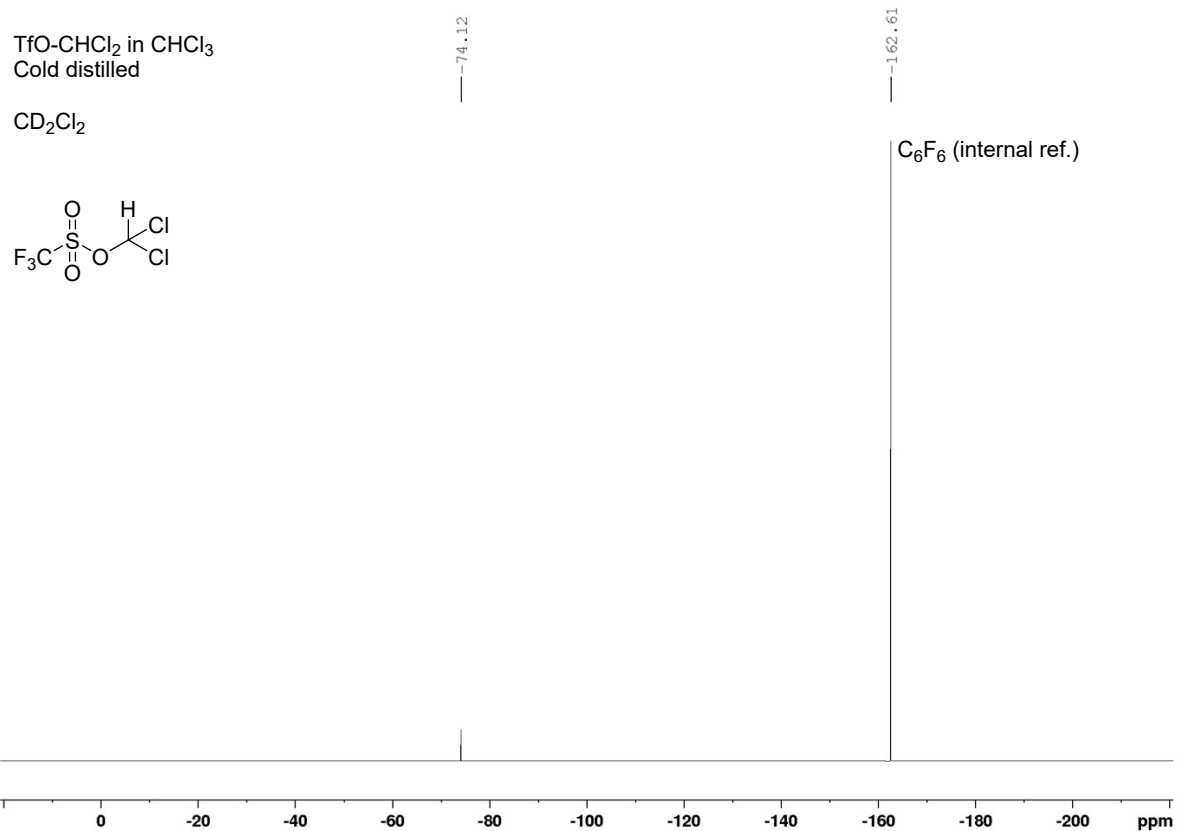

Figure S34. <sup>19</sup>F NMR (CD<sub>2</sub>Cl<sub>2</sub> + ~5 v% CHCl<sub>3</sub>, 470 MHz): TfO-CHCl<sub>2</sub> isolated in CHCl<sub>3</sub>.

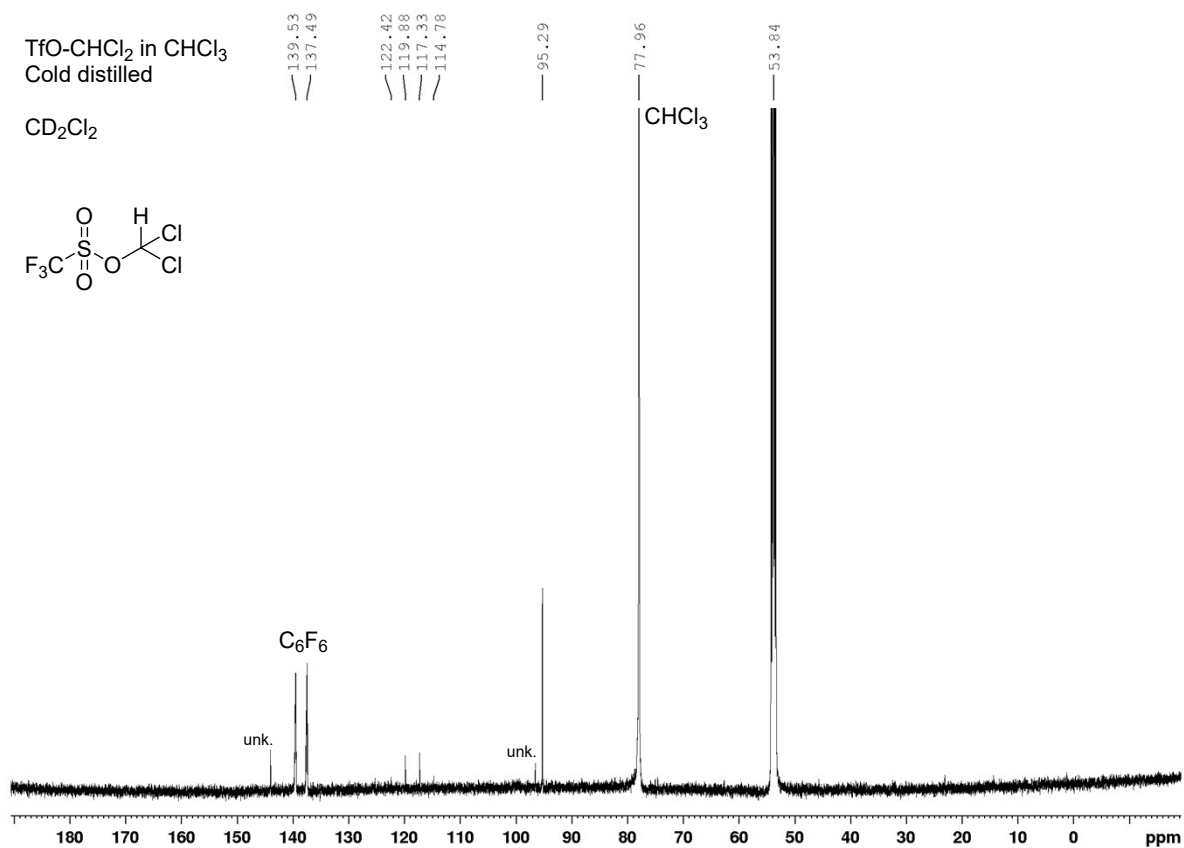

Figure S35. <sup>13</sup>C{<sup>1</sup>H} NMR (CD<sub>2</sub>Cl<sub>2</sub> + ~ 5 v% CHCl<sub>3</sub>, 126 MHz): TfO-CHCl<sub>2</sub> isolated in CHCl<sub>3</sub>. An unknown contaminant likely introduced with the C<sub>6</sub>F<sub>6</sub> spike appears at 144.0 and 96.6 ppm.

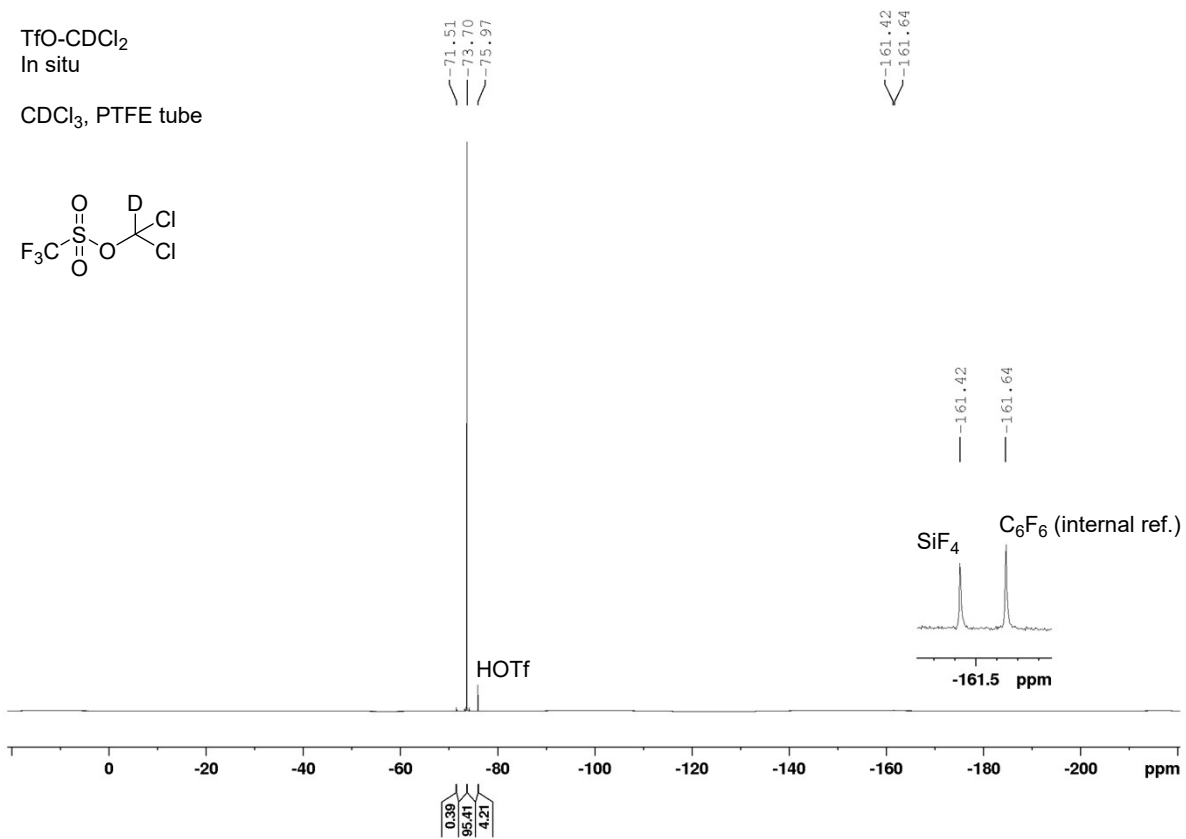

Figure S36. <sup>19</sup>F NMR (CDCl<sub>3</sub>, PTFE tube, 470 MHz): TfO-CDCl<sub>2</sub> generated in PTFE (*in situ*).

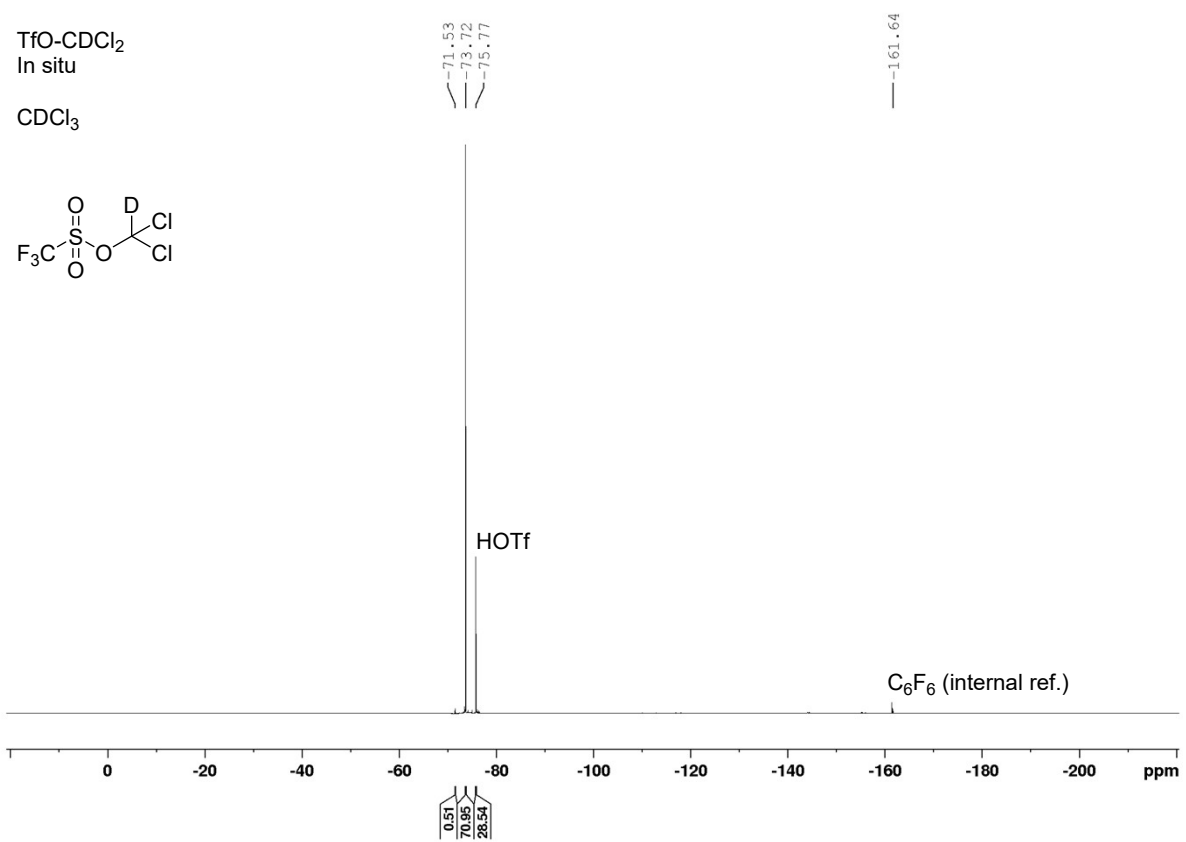

Figure S37. <sup>19</sup>F NMR (CDCl<sub>3</sub>, 470 MHz): TfO-CDCl<sub>2</sub> generated in glass (*in situ*).

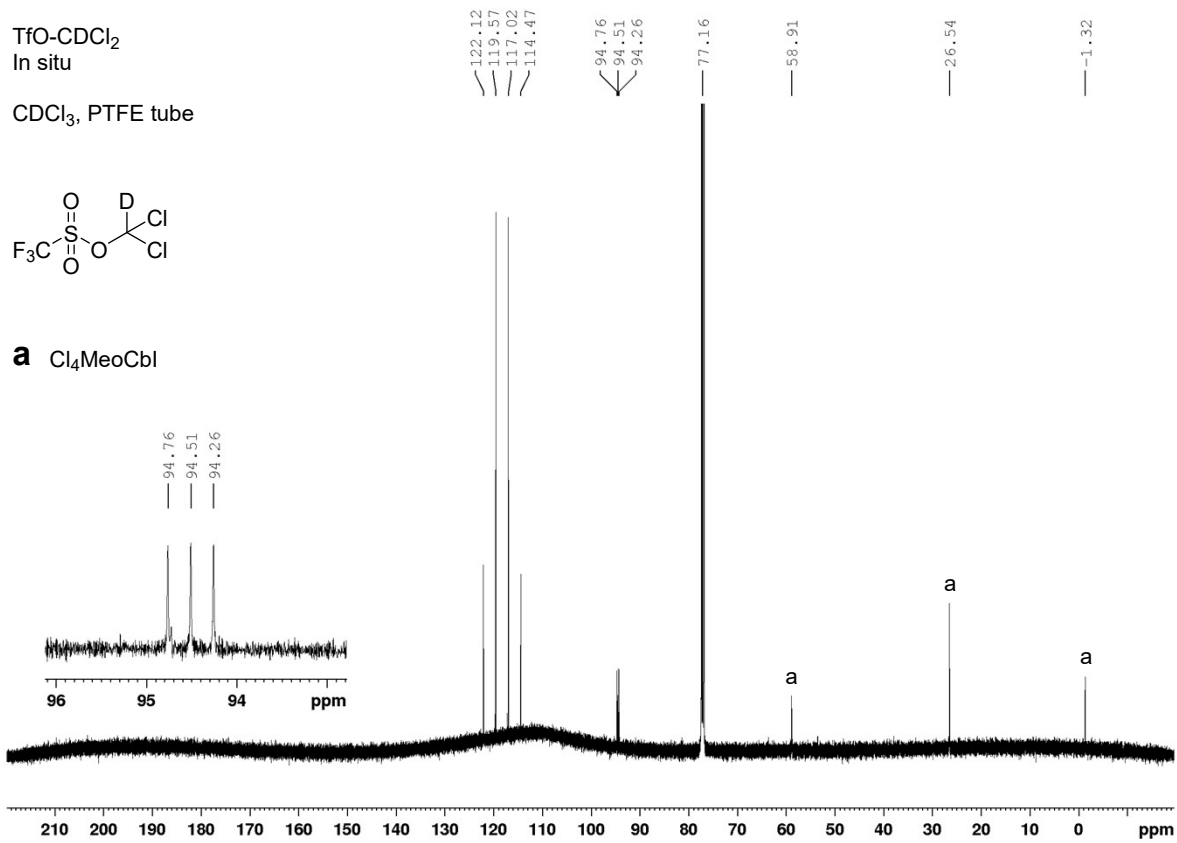

Figure S38. <sup>13</sup>C{<sup>1</sup>H} NMR (CDCl<sub>3</sub>, PTFE tube, 126 MHz): TfO-CDCl<sub>2</sub> generated *in situ*.

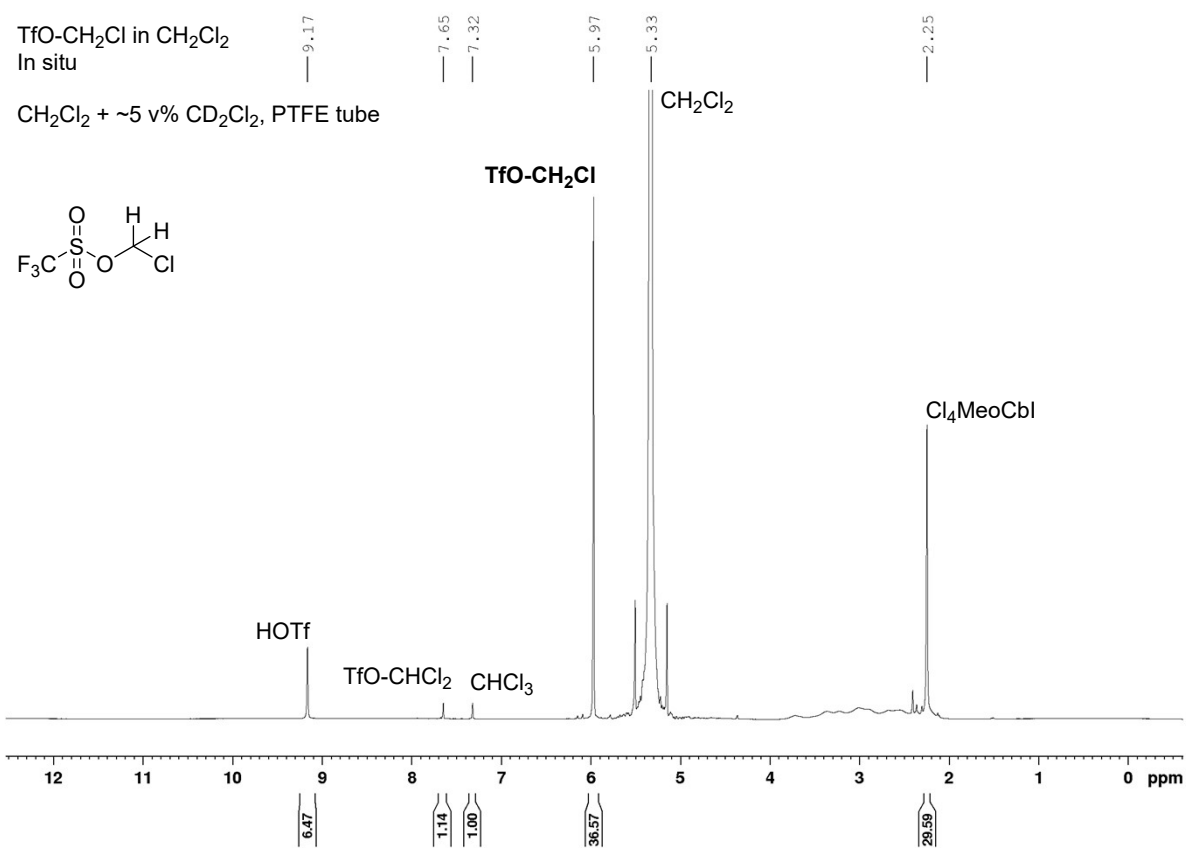

Figure S39. <sup>1</sup>H NMR (CH<sub>2</sub>Cl<sub>2</sub> + CD<sub>2</sub>Cl<sub>2</sub>, PTFE tube, 500 MHz): TfO-CH<sub>2</sub>Cl and related products generated *in situ*.

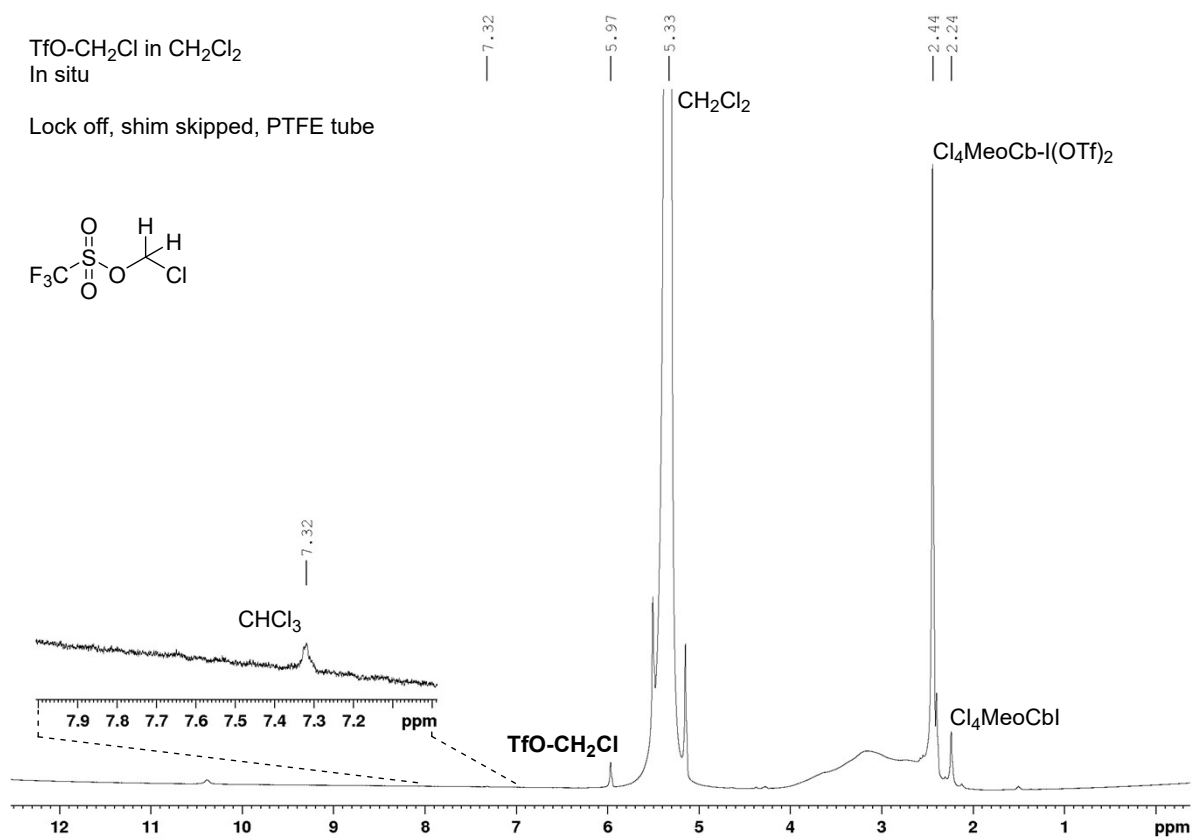

Figure S40. <sup>1</sup>H NMR (CH<sub>2</sub>Cl<sub>2</sub>, unlocked, PTFE tube, 500 MHz): In progress reaction between Cl<sub>4</sub>MeoCb-I(OTf)<sub>2</sub> and CH<sub>2</sub>Cl<sub>2</sub> at approx. 15 minutes. Shows generation of CHCl<sub>3</sub> occurring before TfO-CHCl<sub>2</sub> is detectable.

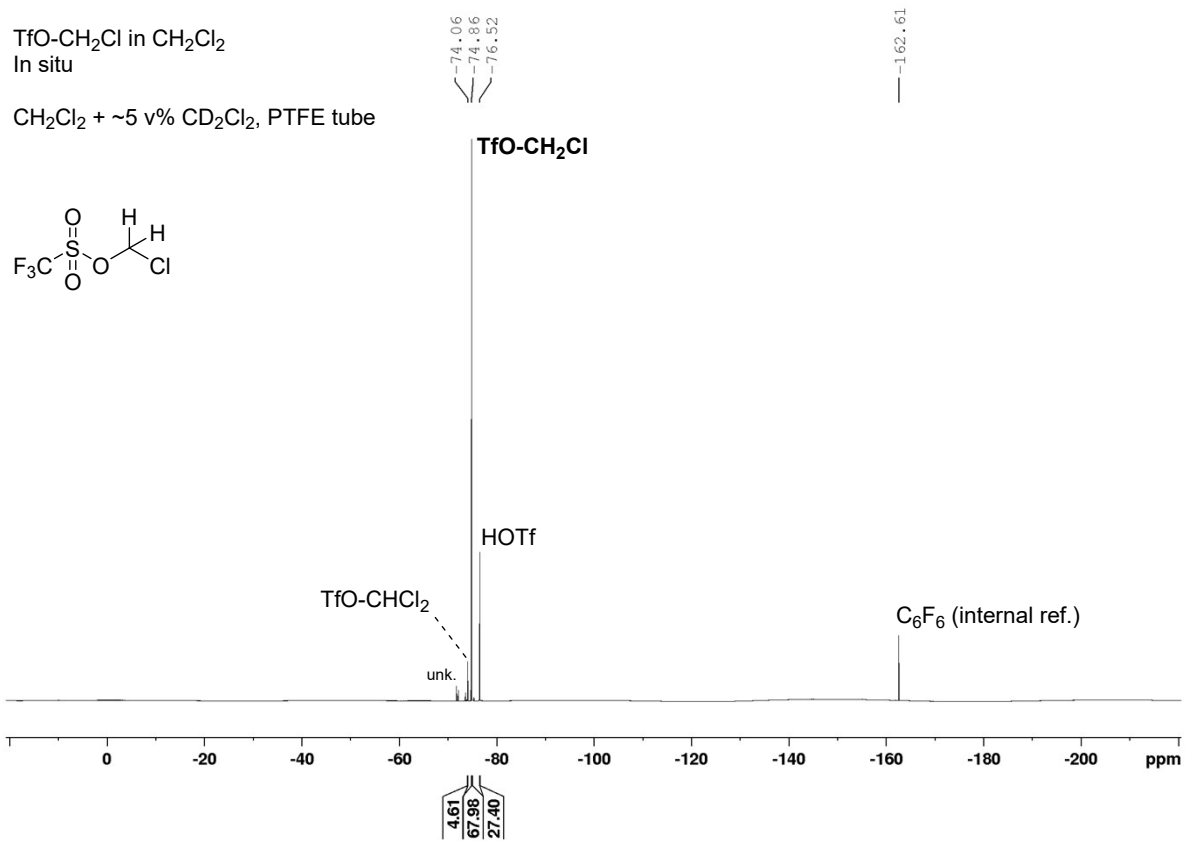

Figure S41. <sup>19</sup>F NMR (CH<sub>2</sub>Cl<sub>2</sub> + CD<sub>2</sub>Cl<sub>2</sub>, PTFE tube, 470 MHz): TfO-CH<sub>2</sub>Cl and related products generated *in situ*.

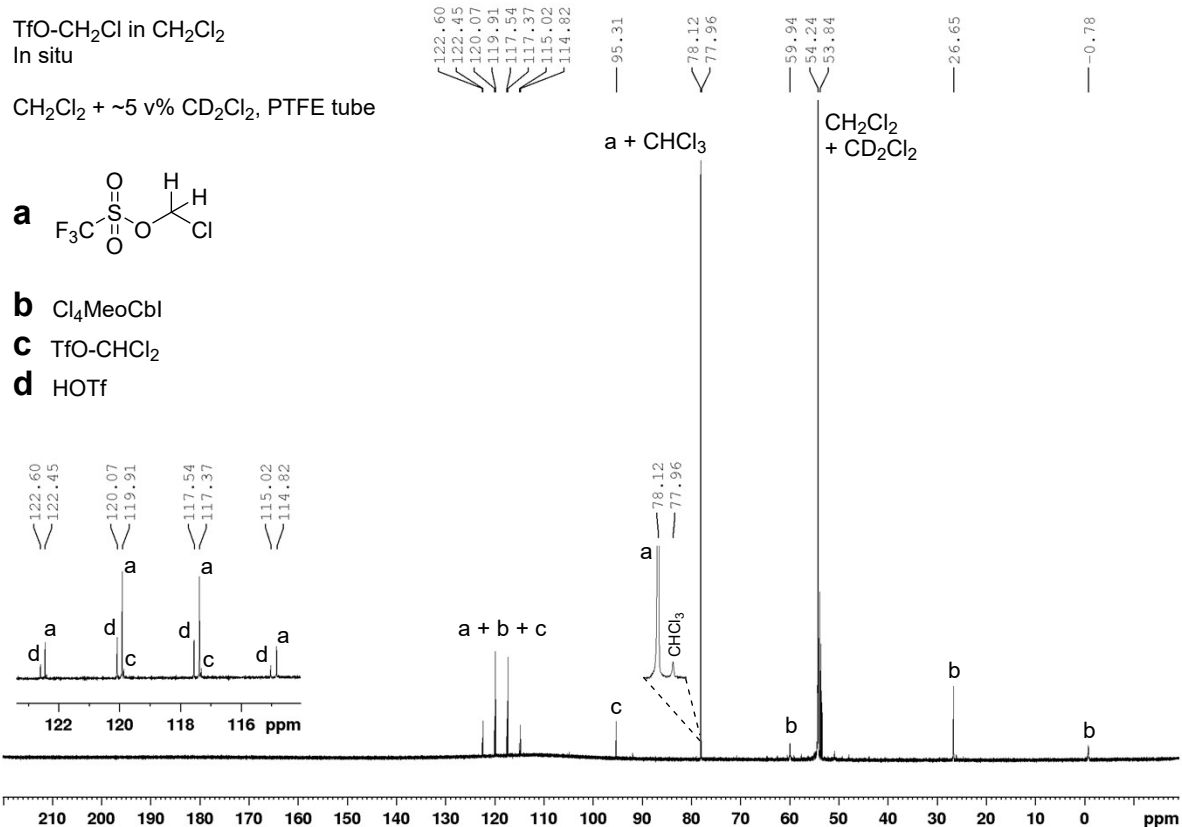

Figure S42. <sup>13</sup>C{<sup>1</sup>H} NMR (CH<sub>2</sub>Cl<sub>2</sub> + CD<sub>2</sub>Cl<sub>2</sub>, PTFE tube, 126 MHz): TfO-CH<sub>2</sub>Cl and related products generated *in situ*.

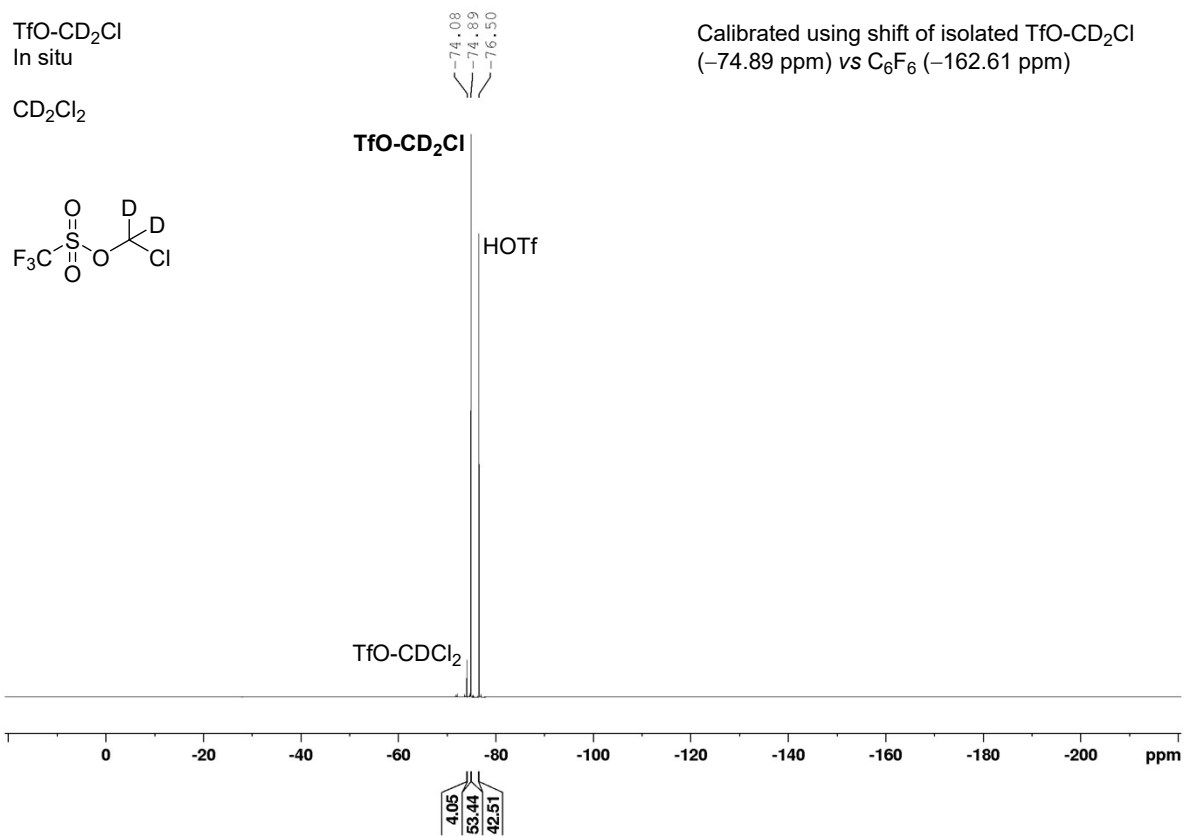

Figure S43. <sup>19</sup>F NMR (CD<sub>2</sub>Cl<sub>2</sub>, 470 MHz): TfO-CD<sub>2</sub>Cl generated *in situ*.

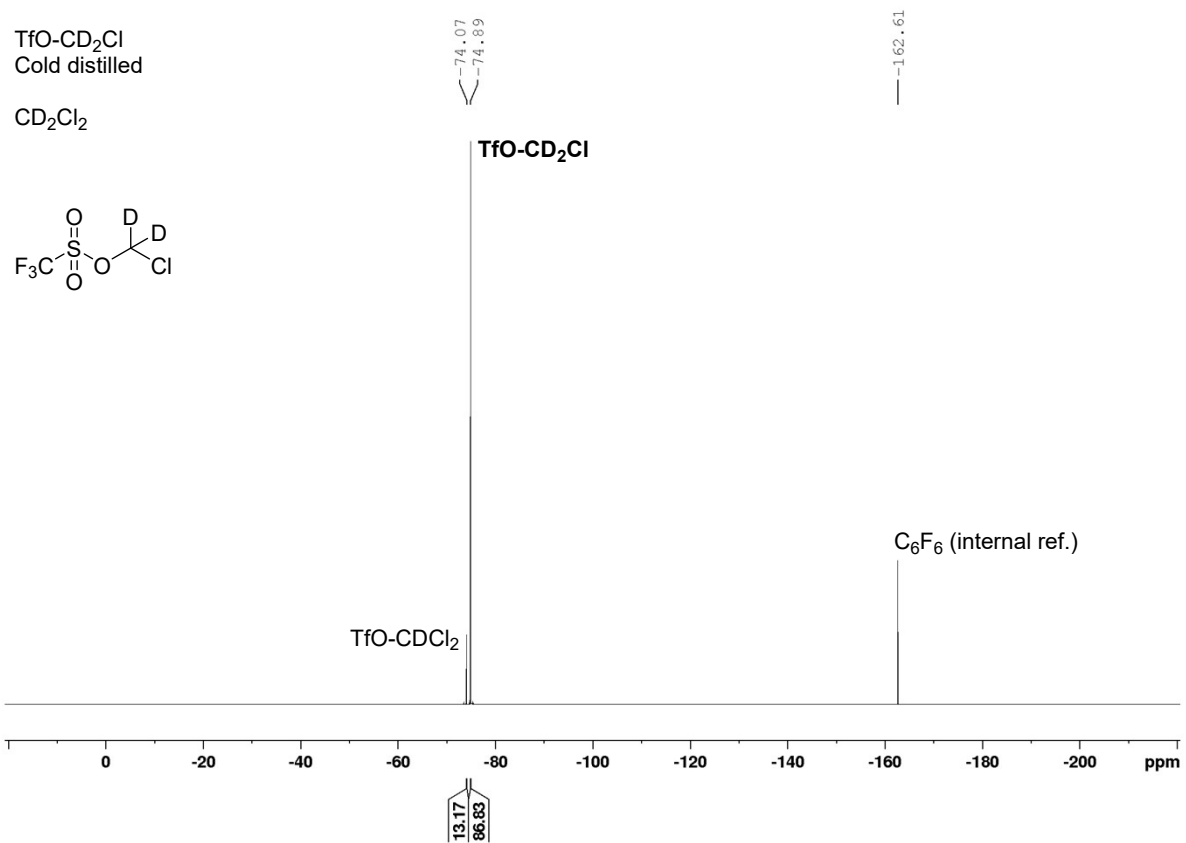

Figure S44. <sup>19</sup>F NMR (CD<sub>2</sub>Cl<sub>2</sub>, 470 MHz): TfO-CD<sub>2</sub>Cl cold distilled alongside TfO-CDCl<sub>2</sub> and the reaction solvent, CD<sub>2</sub>Cl<sub>2</sub>.

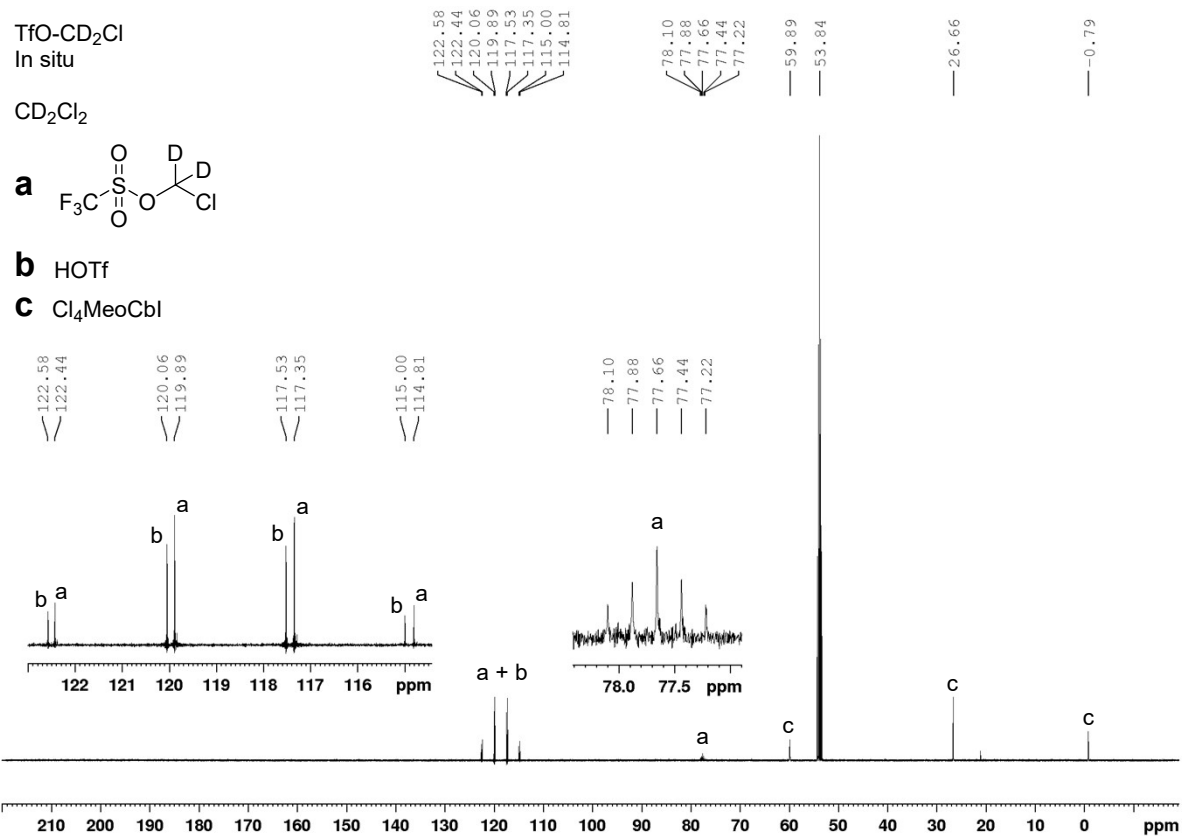

Figure S45. <sup>13</sup>C{<sup>1</sup>H} NMR (CD<sub>2</sub>Cl<sub>2</sub>, 126 MHz): TfO-CD<sub>2</sub>Cl generated *in situ*.

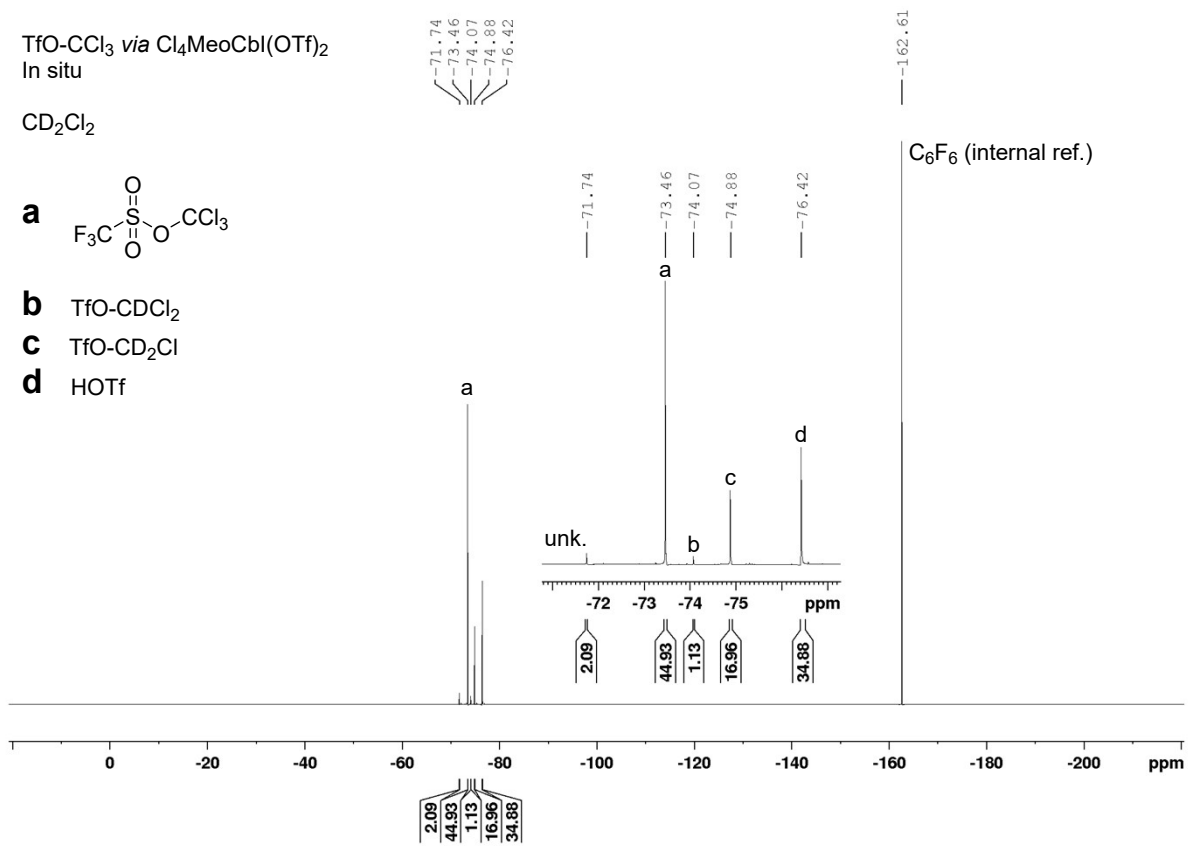

Figure S46. <sup>19</sup>F NMR (CD<sub>2</sub>Cl<sub>2</sub>, 470 MHz): TfO-CCl<sub>3</sub> and side products generated *via* Cl<sub>4</sub>MeoCbl(OTf)<sub>2</sub>.

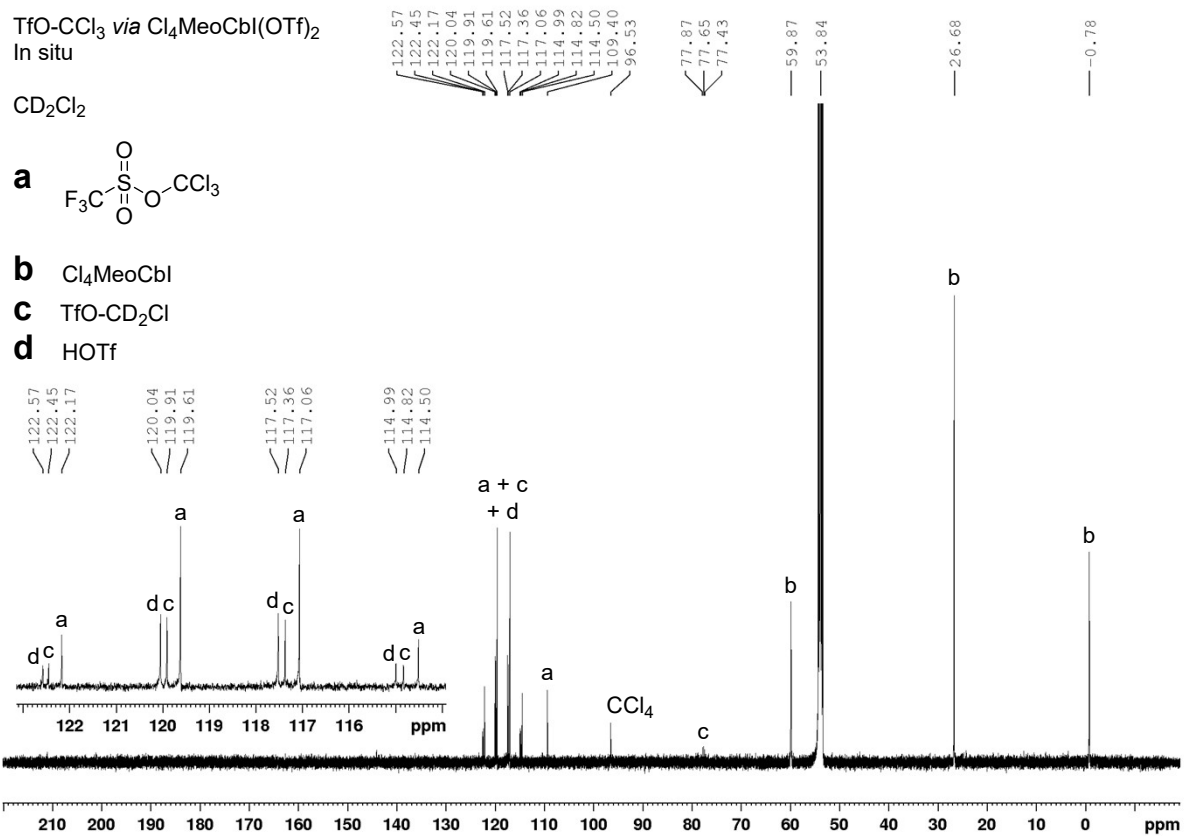

Figure S47. <sup>13</sup>C{<sup>1</sup>H} NMR (CD<sub>2</sub>Cl<sub>2</sub>, 126 MHz): TfO-CCl<sub>3</sub> and side products generated *via* Cl<sub>4</sub>MeoCb-I(OTf)<sub>2</sub>.

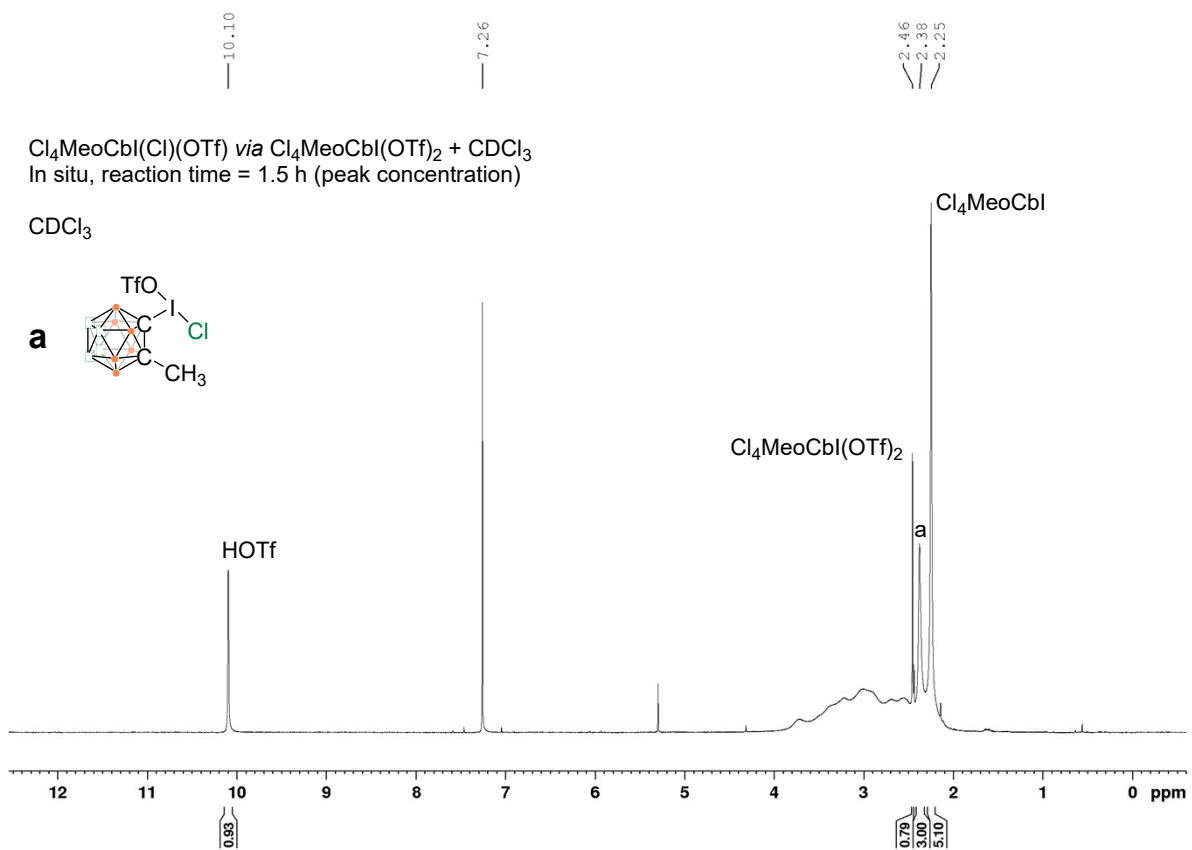

Figure S48.  $^1\text{H}$  NMR ( $\text{CDCl}_3$ , 500 MHz):  $\text{Cl}_4\text{MeoCbI}(\text{OTf})_2 + \text{CDCl}_3$  at 1.5 h with  $\text{Cl}_4\text{MeoCbI}(\text{Cl})(\text{OTf})$  at its peak concentration.

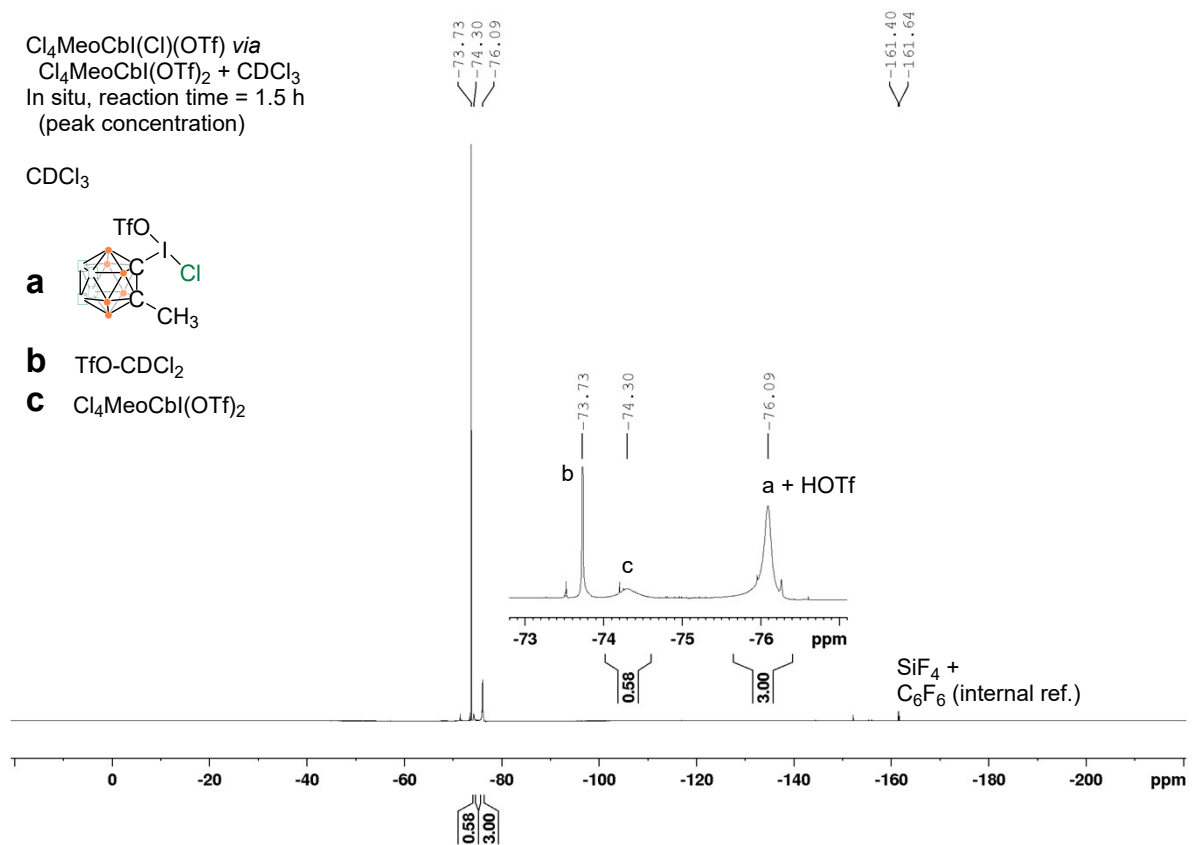

Figure S49.  $^{19}\text{F}$  NMR ( $\text{CDCl}_3$ , PTFE tube, 470 MHz):  $\text{Cl}_4\text{MeoCb-I}(\text{OTf})_2 + \text{CDCl}_3$  at 1.5 h with  $\text{Cl}_4\text{MeoCb-I}(\text{Cl})(\text{OTf})$  at its peak concentration.

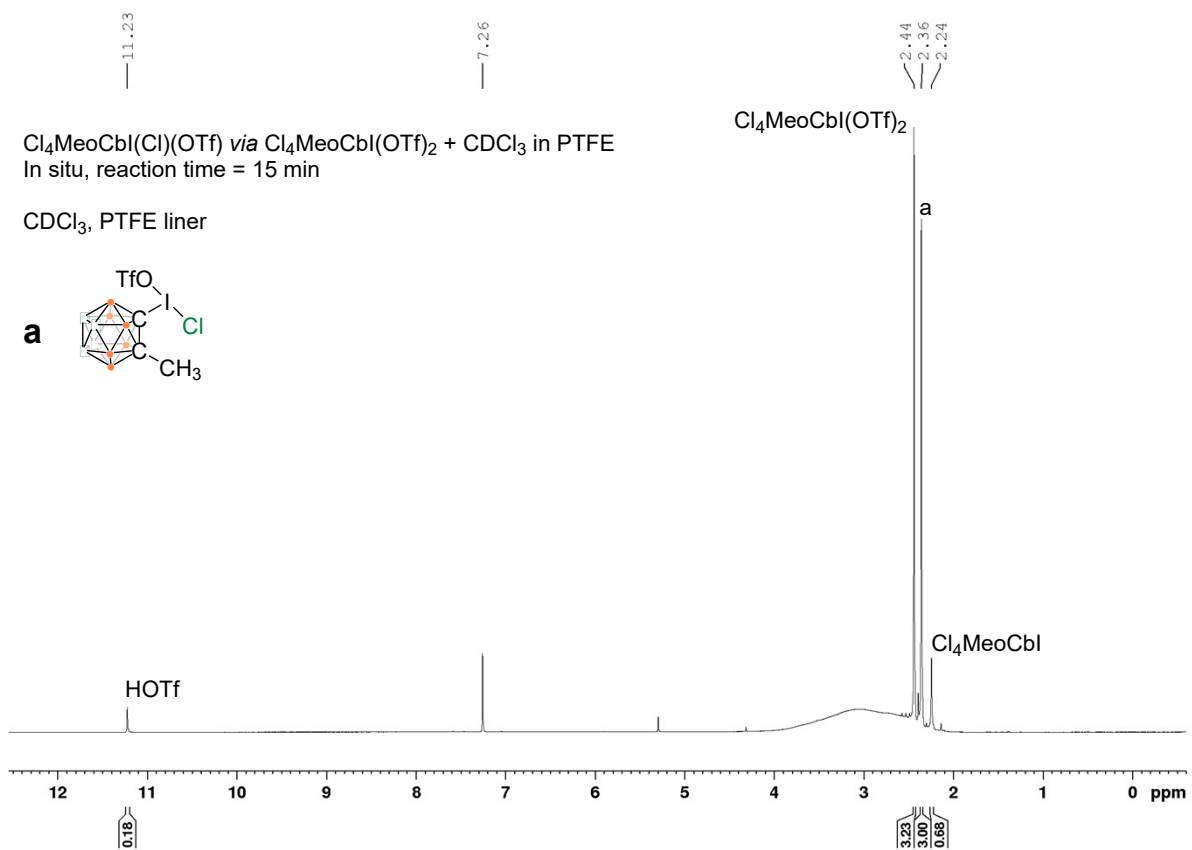

Figure S50.  $^1\text{H}$  NMR ( $\text{CDCl}_3$ , PTFE tube, 500 MHz):  $\text{Cl}_4\text{MeoCbI}(\text{OTf})_2 + \text{CDCl}_3$  in PTFE at 15 min. A large amount of  $\text{Cl}_4\text{MeoCbI}(\text{Cl})(\text{OTf})$  is already visible.

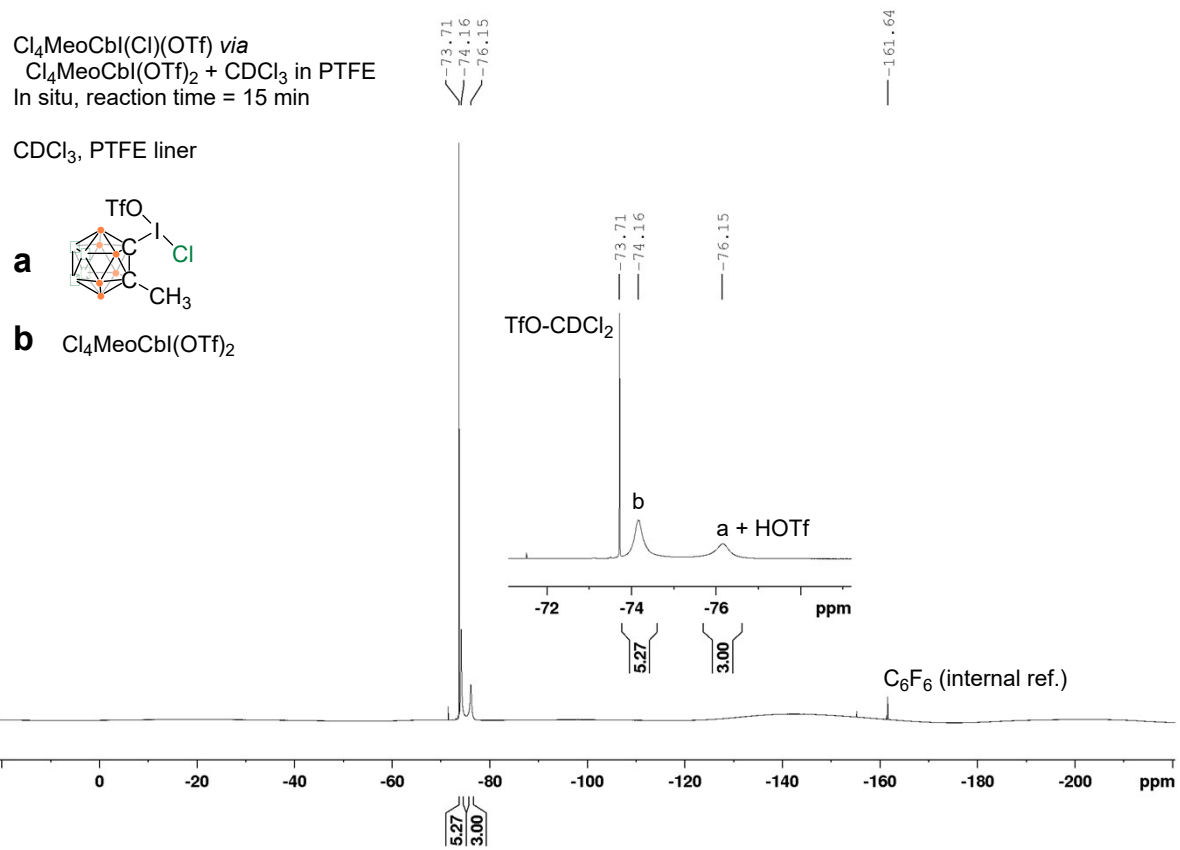

Figure S51.  $^{19}\text{F}$  NMR ( $\text{CDCl}_3$ , PTFE tube, 470 MHz):  $\text{Cl}_4\text{MeoCb-I}(\text{OTf})_2 + \text{CDCl}_3$  in PTFE at 15 min. A large amount of  $\text{Cl}_4\text{MeoCb-I}(\text{Cl})(\text{OTf})$  is already visible.

$\text{Cl}_4\text{MeoCbI}(\text{Cl})(\text{OTf})$  via  
 $\text{Cl}_4\text{MeoCbI}(\text{OTf})_2 + \text{CDCl}_3$  in PTFE  
In situ, reaction time = 15 min

9.08  
4.82  
0.38  
-13.08  
-18.51

$\text{CDCl}_3$ , PTFE liner

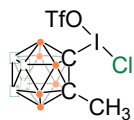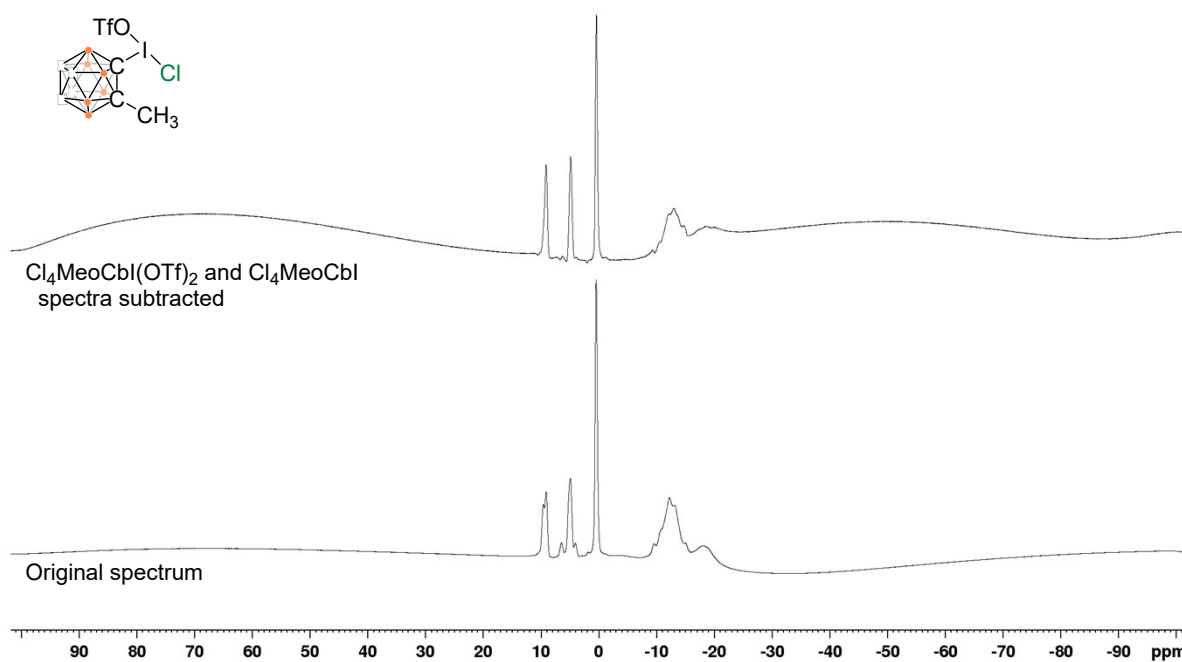

Figure S52.  $^{11}\text{B}$  NMR ( $\text{CDCl}_3$ , PTFE tube, 160 MHz):  $\text{Cl}_4\text{MeoCb-I}(\text{OTf})_2 + \text{CDCl}_3$  in PTFE at 15 min. Top spectrum is remaining signals after subtraction of  $\text{Cl}_4\text{MeoCb-I}(\text{OTf})_2$  and  $\text{Cl}_4\text{MeoCbI}$  spectra in  $\text{CDCl}_3$ . The spectrum for  $\text{Cl}_4\text{MeoCb-I}(\text{OTf})_2$  in  $\text{CDCl}_3$  was generated by the same method using a scan in glass where a greatly reduced quantity of  $\text{Cl}_4\text{MeoCb-I}(\text{Cl})(\text{OTf})$  is present.

Cl<sub>4</sub>MeoCbI(Cl)(OTf) via  
 Cl<sub>4</sub>MeoCbI(OTf)<sub>2</sub> + CDCl<sub>3</sub> in PTFE  
 In situ, reaction time = 0.5-1.5 h

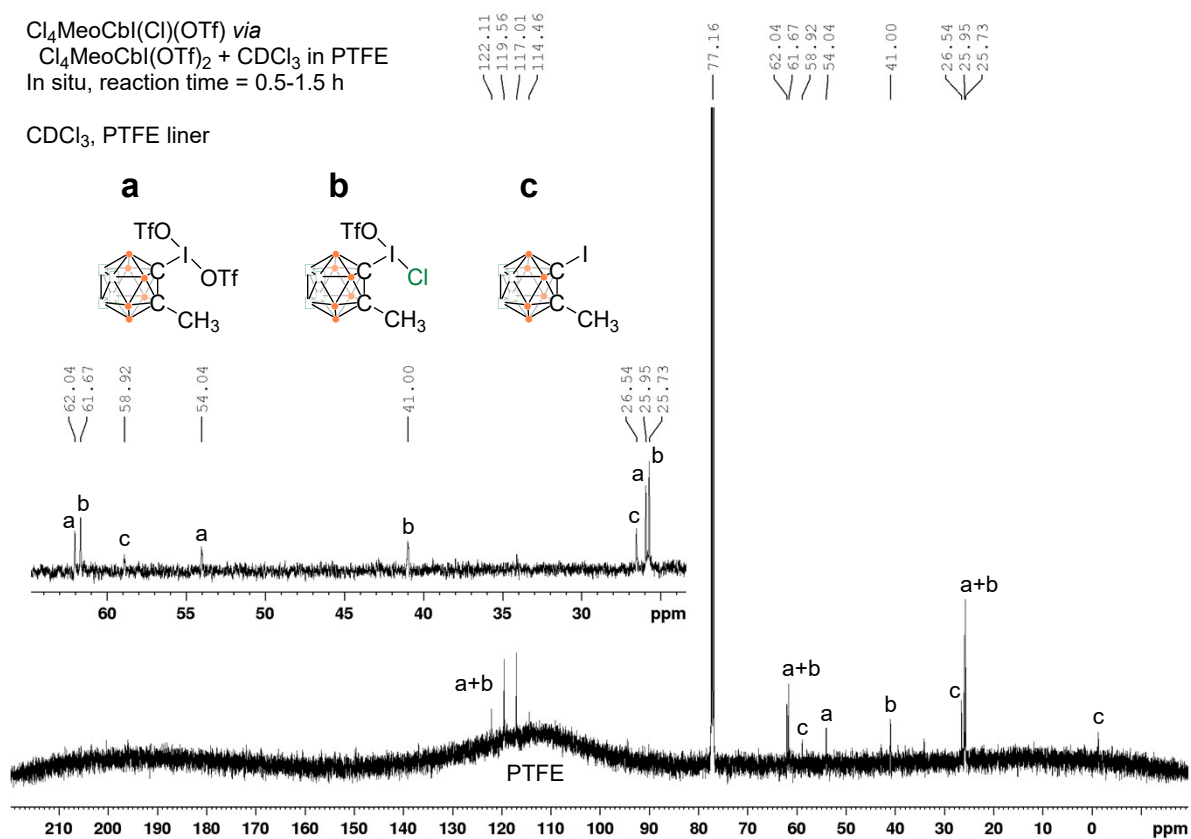

Figure S53. <sup>13</sup>C{<sup>1</sup>H} NMR (CDCl<sub>3</sub>, PTFE liner, 126 MHz): Cl<sub>4</sub>MeoCb-I(OTf)<sub>2</sub> + CDCl<sub>3</sub> in PTFE at 0.5-1.5 h.

Tf<sub>2</sub>O  
60 mg, control  
CDCl<sub>3</sub>

7.97  
7.26

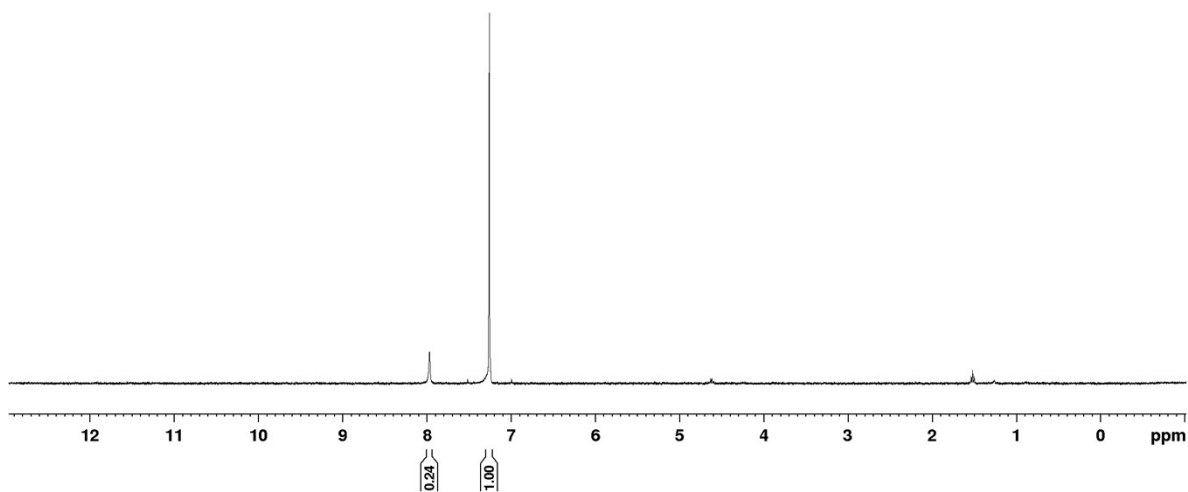

Figure S54. <sup>1</sup>H NMR (CDCl<sub>3</sub>, 400 MHz): Concentrated Tf<sub>2</sub>O to quantify H<sub>2</sub>O contamination.

Tf<sub>2</sub>O  
60 mg, control  
CDCl<sub>3</sub>

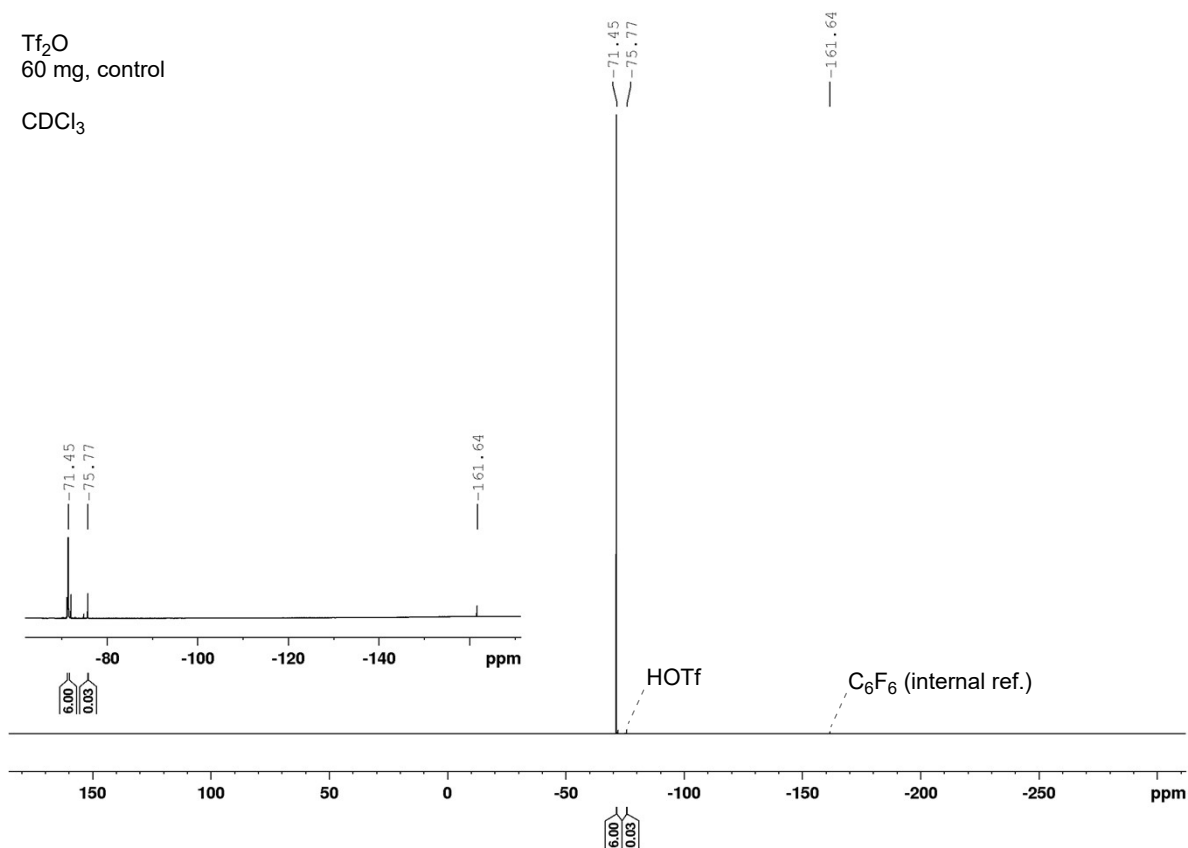

Figure S55. <sup>19</sup>F NMR (CDCl<sub>3</sub>, 376 MHz): Concentrated Tf<sub>2</sub>O to quantify H<sub>2</sub>O contamination.

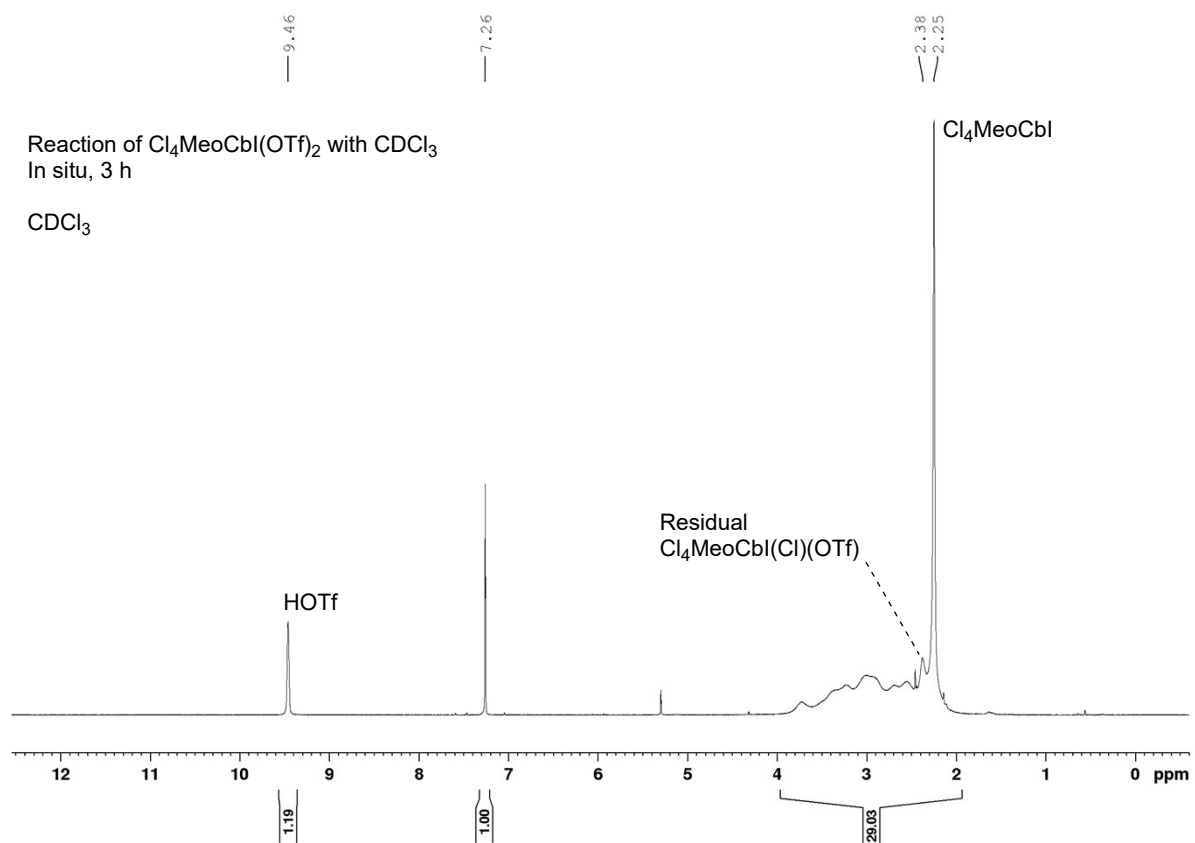

Figure S56.  $^1\text{H}$  NMR ( $\text{CDCl}_3$ , 500 MHz): Reaction of  $\text{Cl}_4\text{MeoCbI}(\text{OTf})_2$  with  $\text{CDCl}_3$  in glass near completion at 3 h.

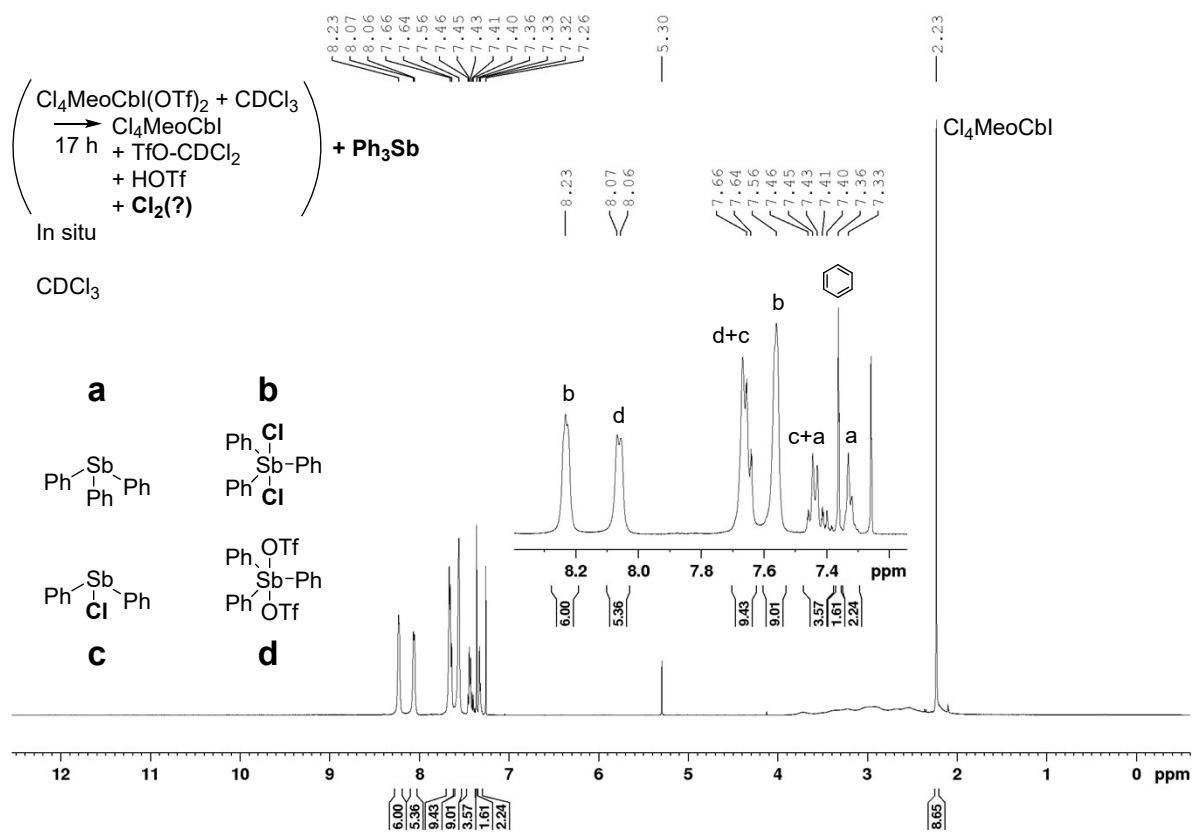

Figure S57. <sup>1</sup>H NMR (CDCl<sub>3</sub>, 500 MHz): Addition of Ph<sub>3</sub>Sb to a fully degraded sample of Cl<sub>4</sub>MeoCb-I(OTf)<sub>2</sub> in CDCl<sub>3</sub>.

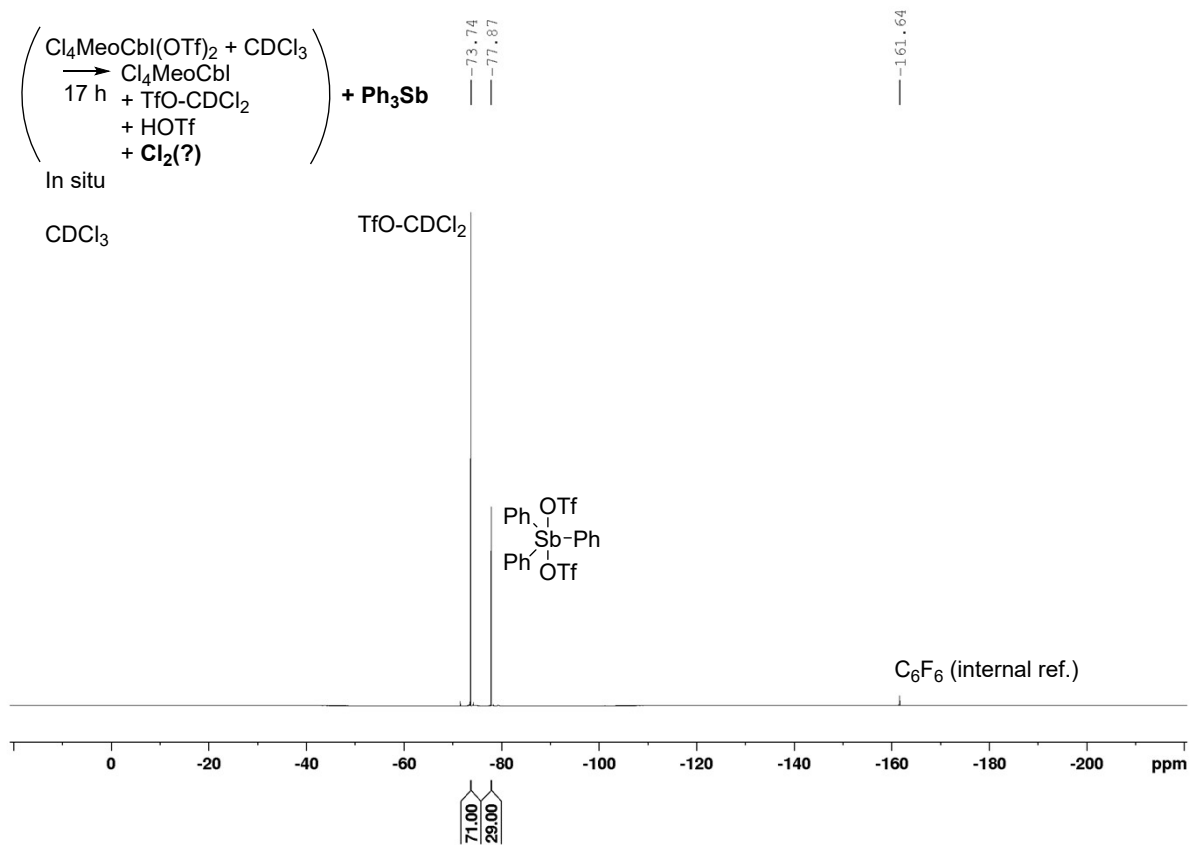

Figure S58.  $^{19}\text{F}$  NMR ( $\text{CDCl}_3$ , 470 MHz): Addition of  $\text{Ph}_3\text{Sb}$  to a fully degraded sample of  $\text{Cl}_4\text{MeoCb-I}(\text{OTf})_2$  in  $\text{CDCl}_3$ .

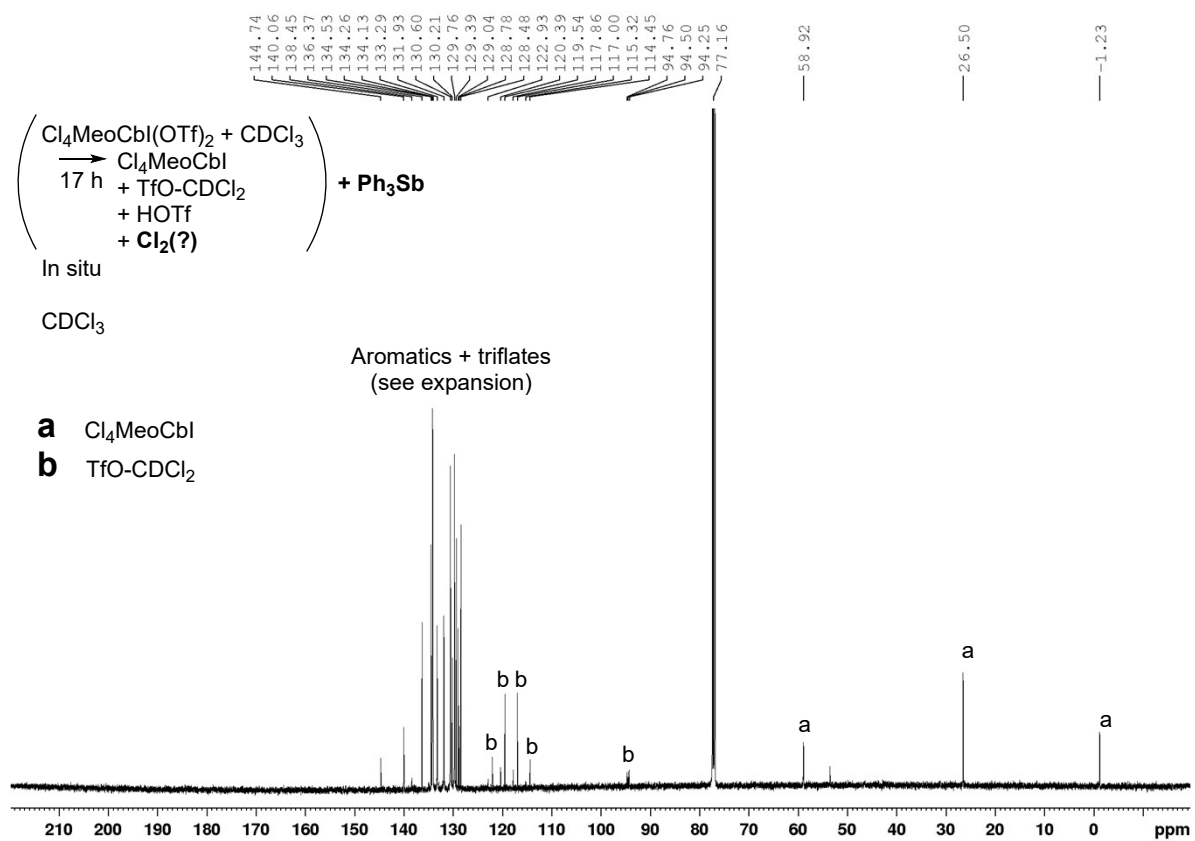

Figure S59. <sup>13</sup>C{<sup>1</sup>H} NMR (CDCl<sub>3</sub>, 126 MHz): Addition of Ph<sub>3</sub>Sb to a fully degraded sample of Cl<sub>4</sub>MeoCb-I(OTf)<sub>2</sub> in CDCl<sub>3</sub>. Spectrum 1 of 2 (full).

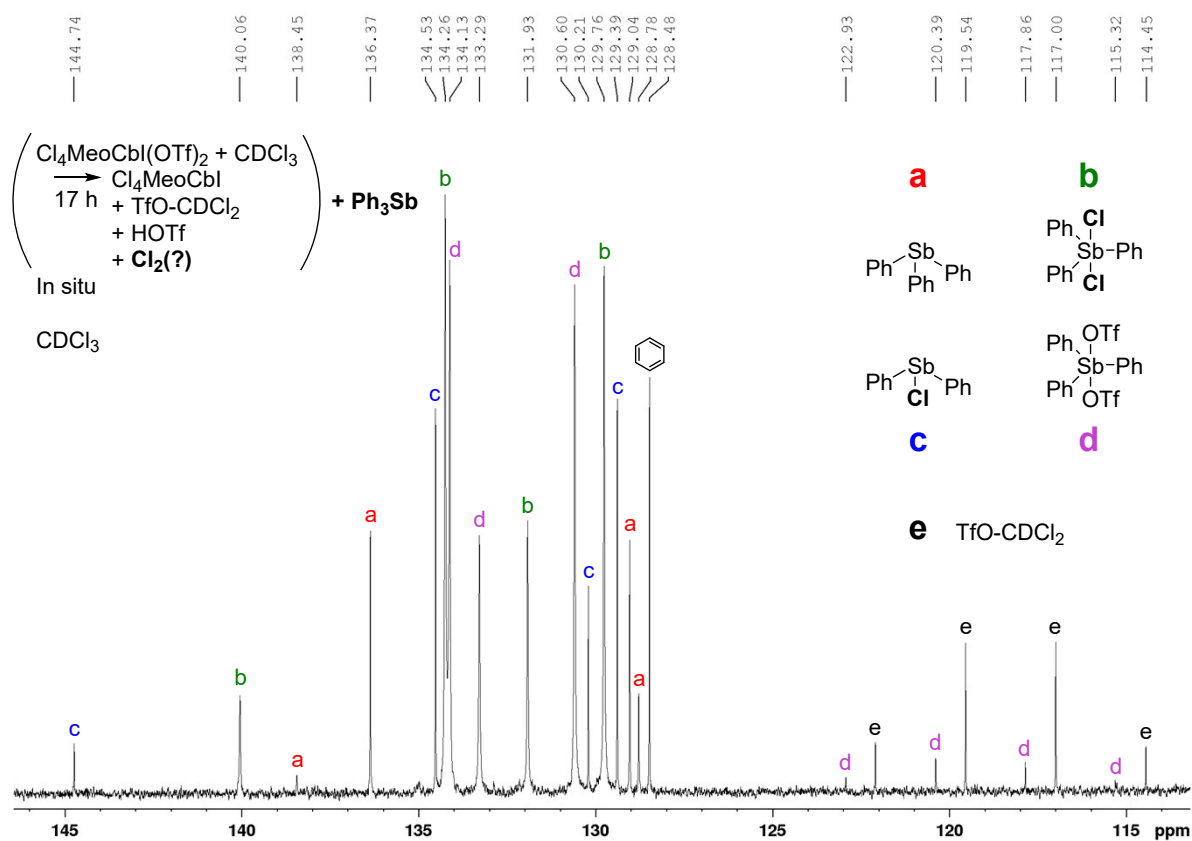

Figure S60.  $^{13}\text{C}\{^1\text{H}\}$  NMR ( $\text{CDCl}_3$ , 126 MHz): Addition of  $\text{Ph}_3\text{Sb}$  to a fully degraded sample of  $\text{Cl}_4\text{MeoCb-I}(\text{OTf})_2$  in  $\text{CDCl}_3$ . Spectrum 2 of 2 (expansion).

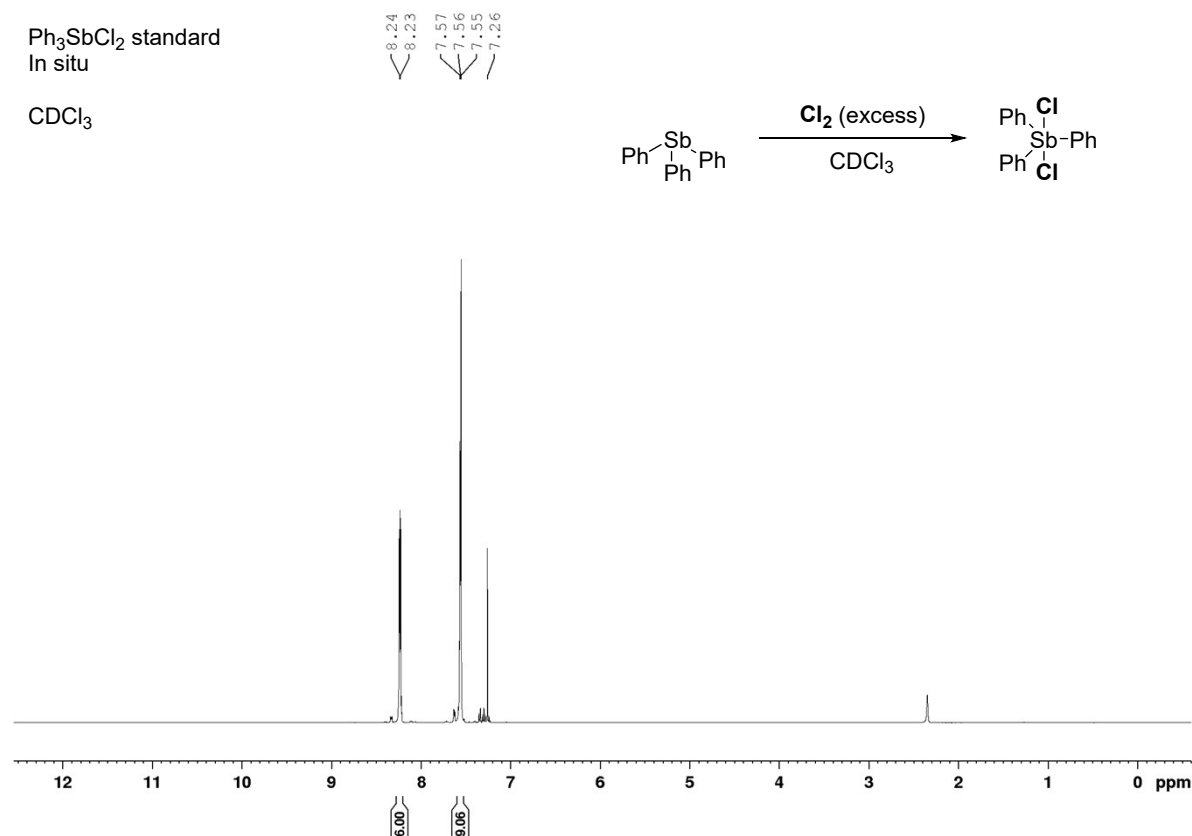

Figure S61.  $^1\text{H}$  NMR ( $\text{CDCl}_3$ , 500 MHz):  $\text{Ph}_3\text{SbCl}_2$  generated in situ from  $\text{Ph}_3\text{Sb}$  and  $\text{Cl}_2$ .

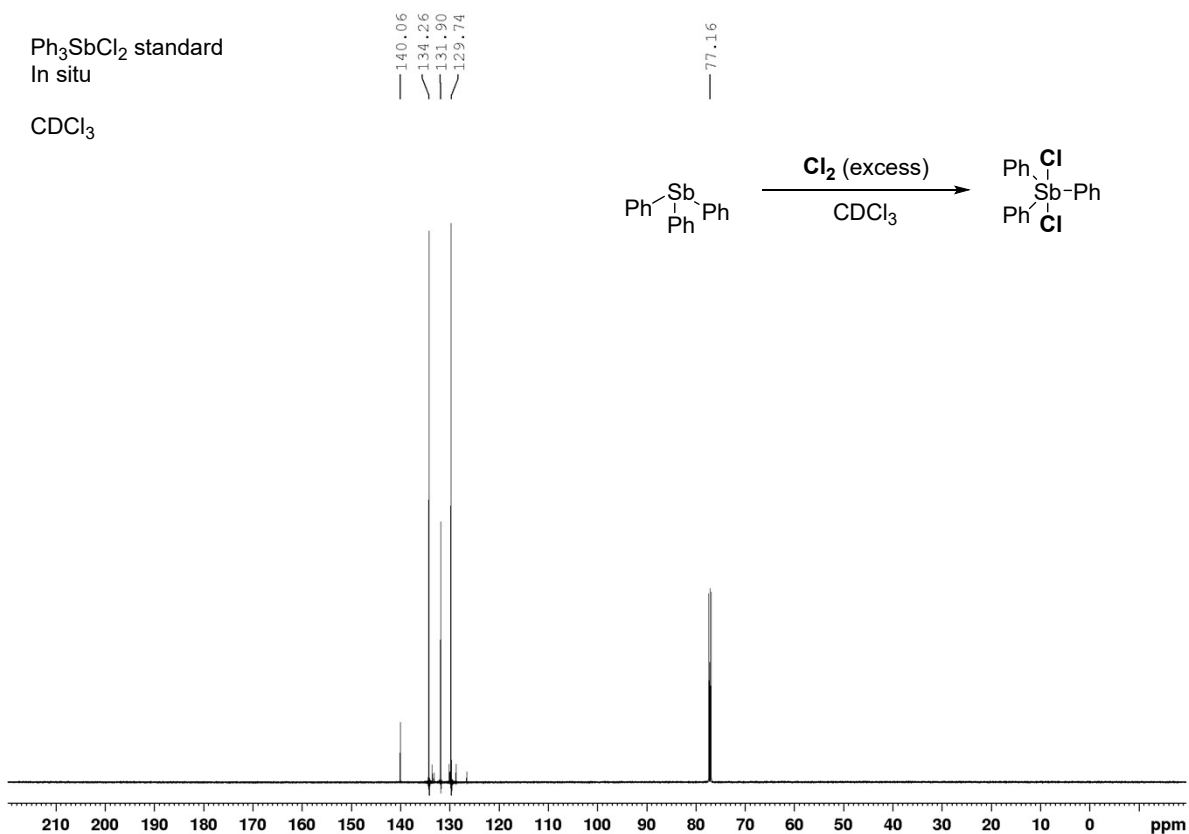

Figure S62.  $^{13}\text{C}\{^1\text{H}\}$  NMR ( $\text{CDCl}_3$ , 126 MHz):  $\text{Ph}_3\text{SbCl}_2$  generated in situ from  $\text{Ph}_3\text{Sb}$  and  $\text{Cl}_2$ .

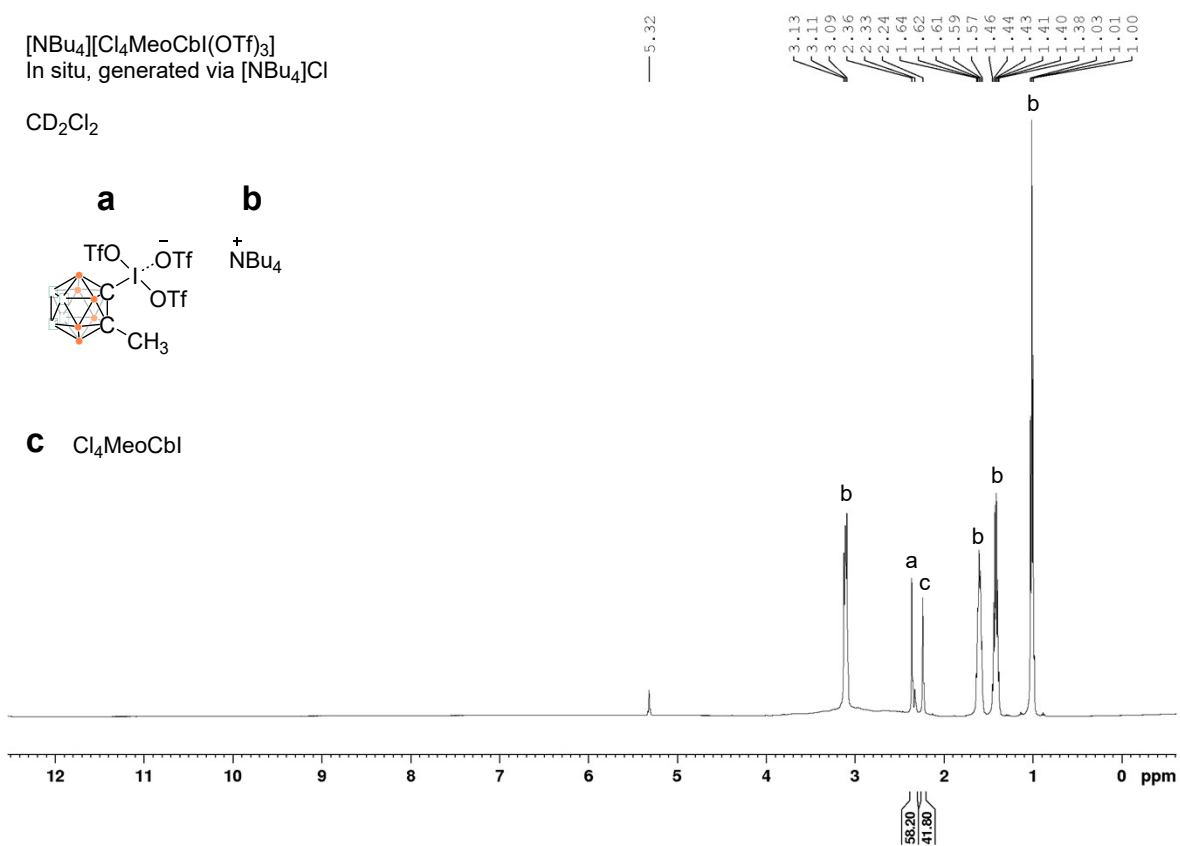

Figure S63.  $^1\text{H}$  NMR ( $\text{CD}_2\text{Cl}_2$ , 500 MHz):  $[\text{NBu}_4][\text{Cl}_4\text{MeoCbI}(\text{OTf})_3]$  generated *via*  $[\text{NBu}_4]\text{Cl}$ .

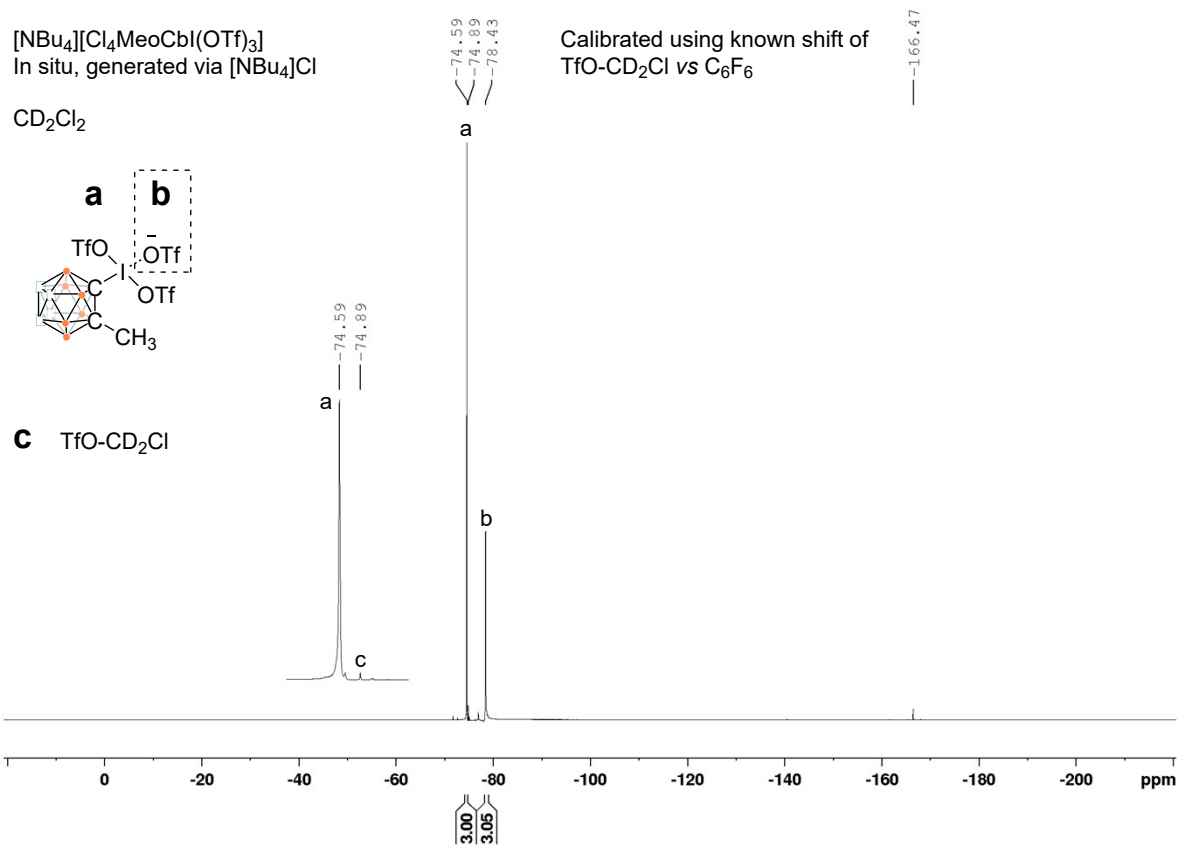

Figure S64.  $^{19}\text{F}$  NMR ( $\text{CD}_2\text{Cl}_2$ , 470 MHz):  $[\text{NBu}_4][\text{Cl}_4\text{MeoCb-I}(\text{OTf})_3]$  generated *via*  $[\text{NBu}_4]\text{Cl}$ .

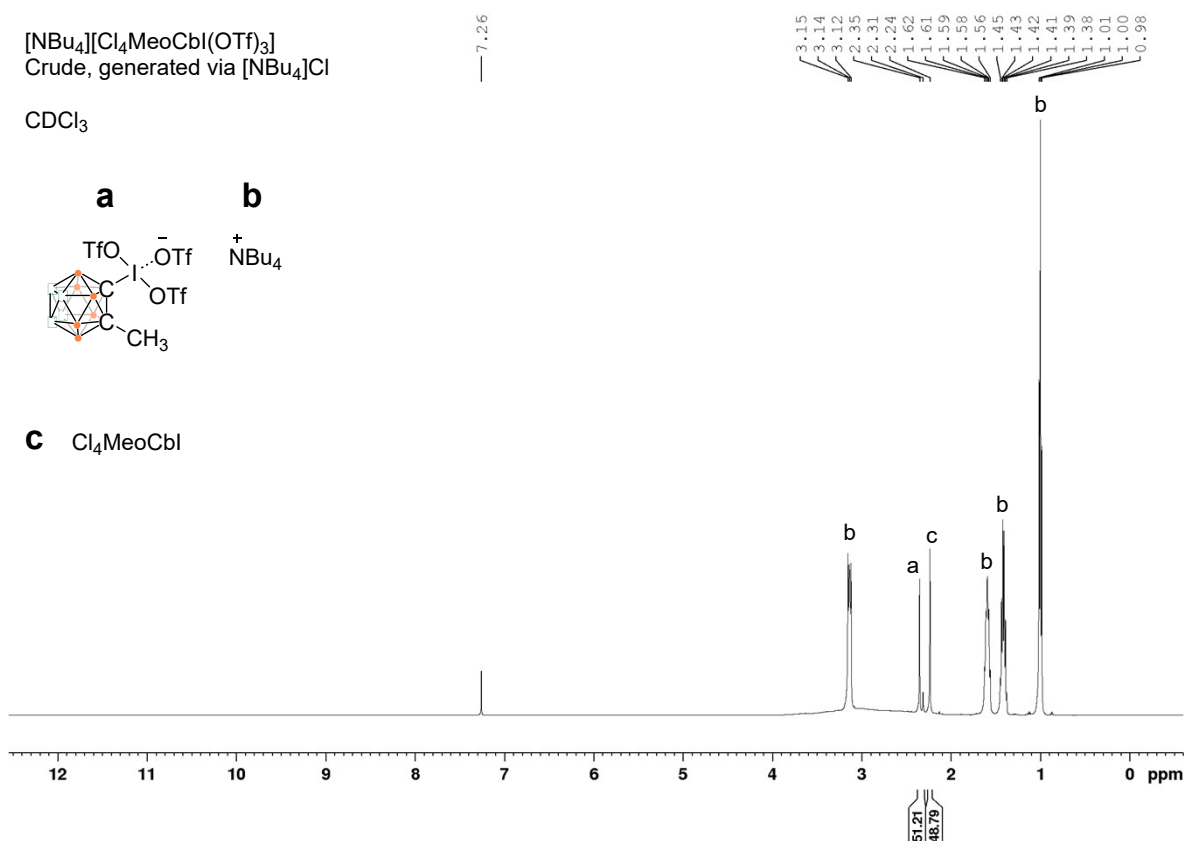

Figure S65.  $^1\text{H}$  NMR ( $\text{CDCl}_3$ , 500 MHz):  $[\text{NBu}_4][\text{Cl}_4\text{MeoCb-I}(\text{OTf})_3]$  generated *via*  $[\text{NBu}_4]\text{Cl}$ .

[NBu<sub>4</sub>][Cl<sub>4</sub>MeoCb(OTf)<sub>3</sub>]  
Crude, generated via [NBu<sub>4</sub>]Cl

CDCl<sub>3</sub>

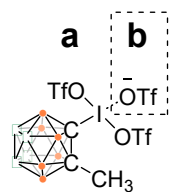

**C** HOTf (?)

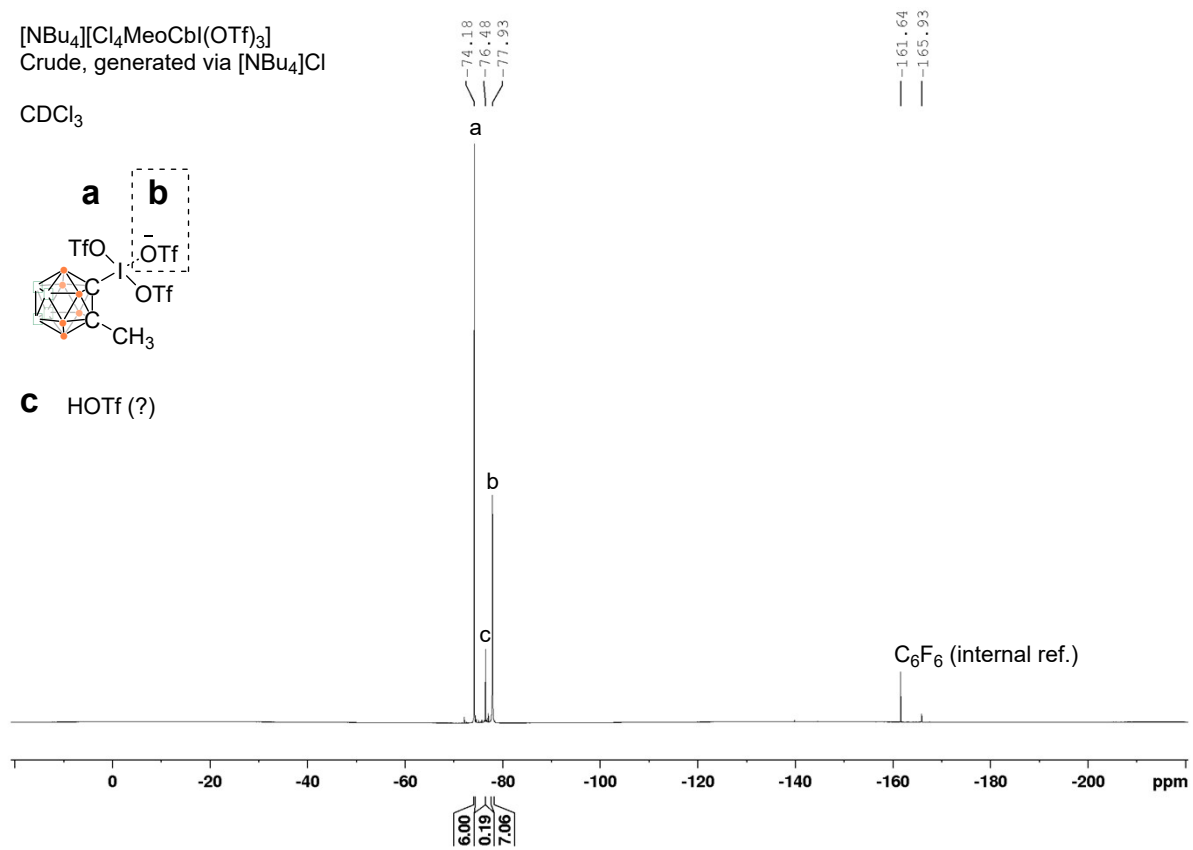

Figure S66. <sup>19</sup>F NMR (CDCl<sub>3</sub>, 470 MHz): [NBu<sub>4</sub>][Cl<sub>4</sub>MeoCb-I(OTf)<sub>3</sub>] generated *via* [NBu<sub>4</sub>]Cl.

$[\text{NBu}_4][\text{Cl}_4\text{MeoCbI}(\text{OTf})_3]$   
Crude, generated via  $[\text{NBu}_4]\text{Cl}$

$\text{CDCl}_3$

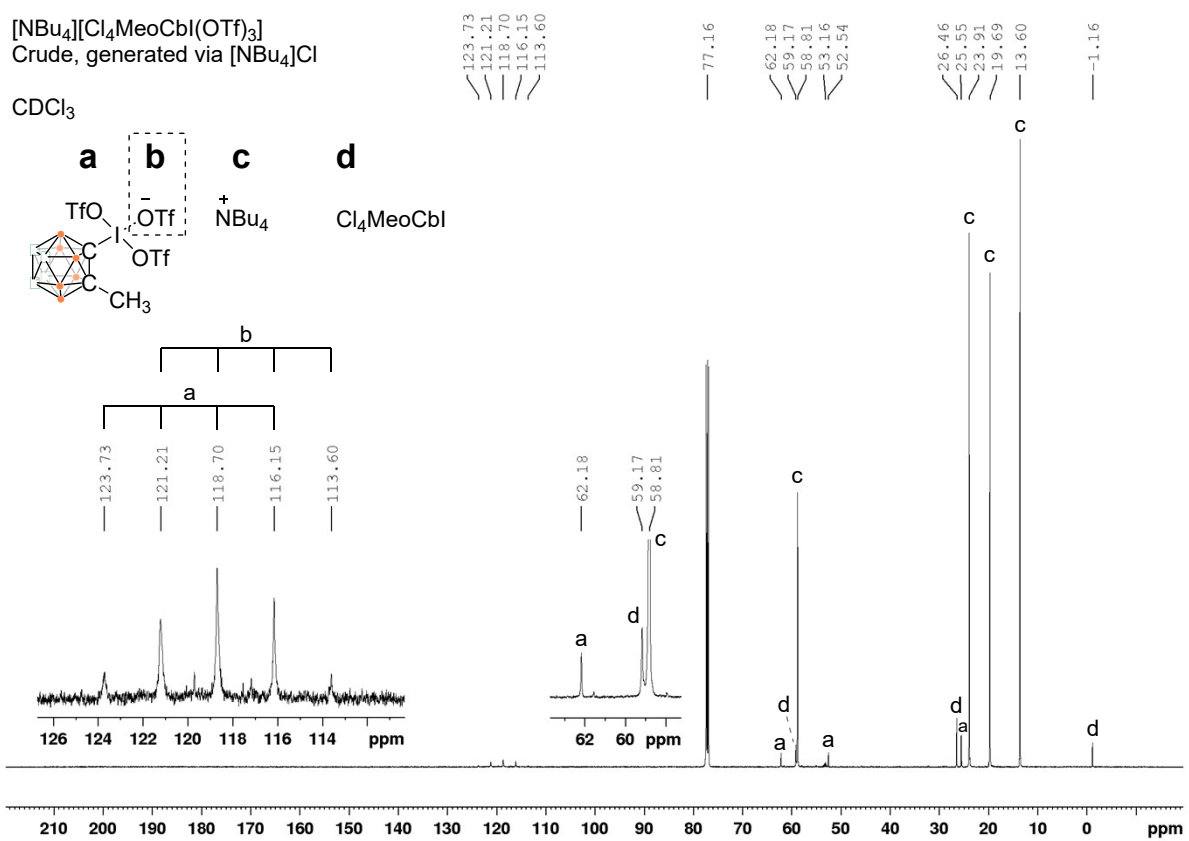

Figure S67.  $^{13}\text{C}\{^1\text{H}\}$  NMR ( $\text{CDCl}_3$ , 126 MHz):  $[\text{NBu}_4][\text{Cl}_4\text{MeoCbI}(\text{OTf})_3]$  generated *via*  $[\text{NBu}_4]\text{Cl}$ .

$[\text{NBu}_4][\text{Cl}_4\text{MeoCbI}(\text{OTf})_3]$   
Crude, generated via  $[\text{NBu}_4]\text{Cl}$   
+ 62 h in solution

$\text{CDCl}_3$

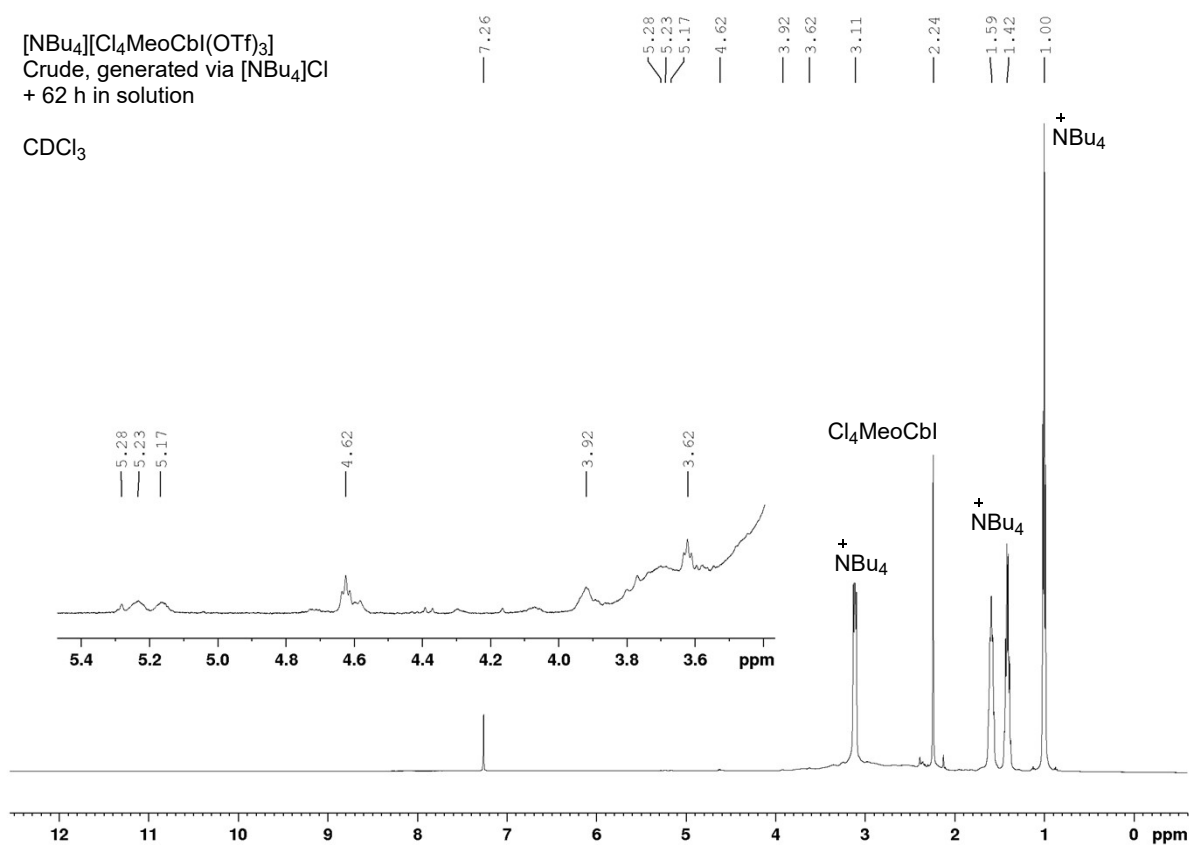

Figure S68.  $^1\text{H}$  NMR ( $\text{CDCl}_3$ , 500 MHz):  $[\text{NBu}_4][\text{Cl}_4\text{MeoCb-I}(\text{OTf})_3]$  generated *via*  $[\text{NBu}_4]\text{Cl}$  after 62 h in solution.

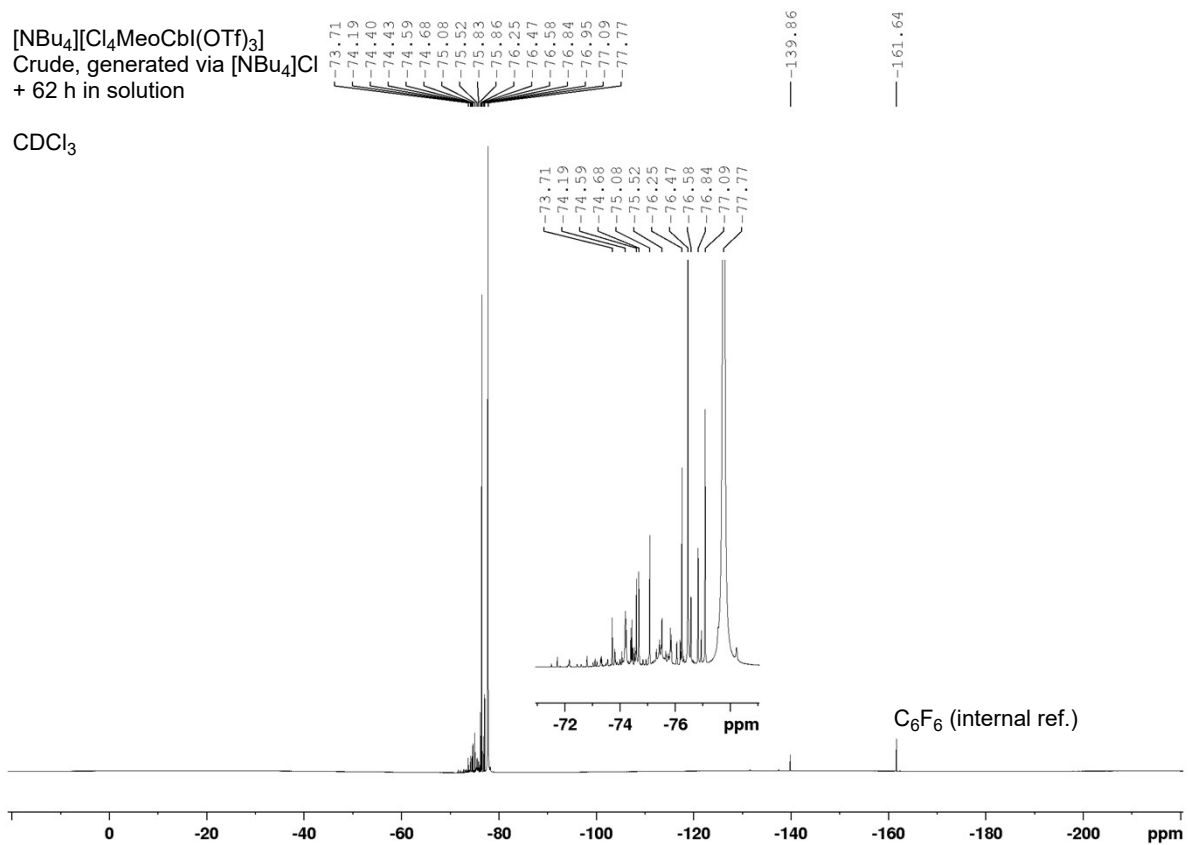

Figure S69. <sup>19</sup>F NMR (CDCl<sub>3</sub>, 470 MHz): [NBu<sub>4</sub>][Cl<sub>4</sub>MeoCb-I(OTf)<sub>3</sub>] generated *via* [NBu<sub>4</sub>]Cl after 62 h in solution.

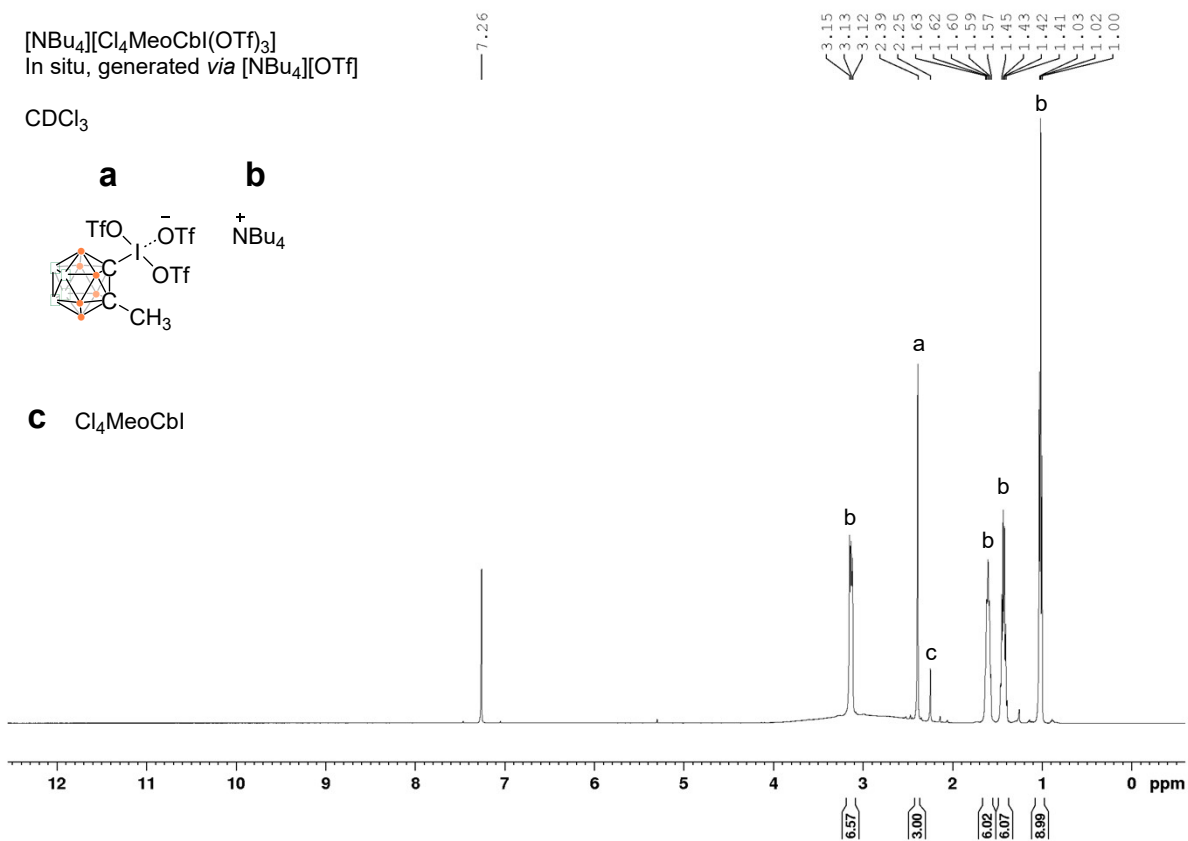

Figure S70.  $^1\text{H}$  NMR ( $\text{CDCl}_3$ , 500 MHz):  $[\text{NBu}_4][\text{Cl}_4\text{MeoCb-I}(\text{OTf})_3]$  generated *via*  $[\text{NBu}_4][\text{OTf}]$ .

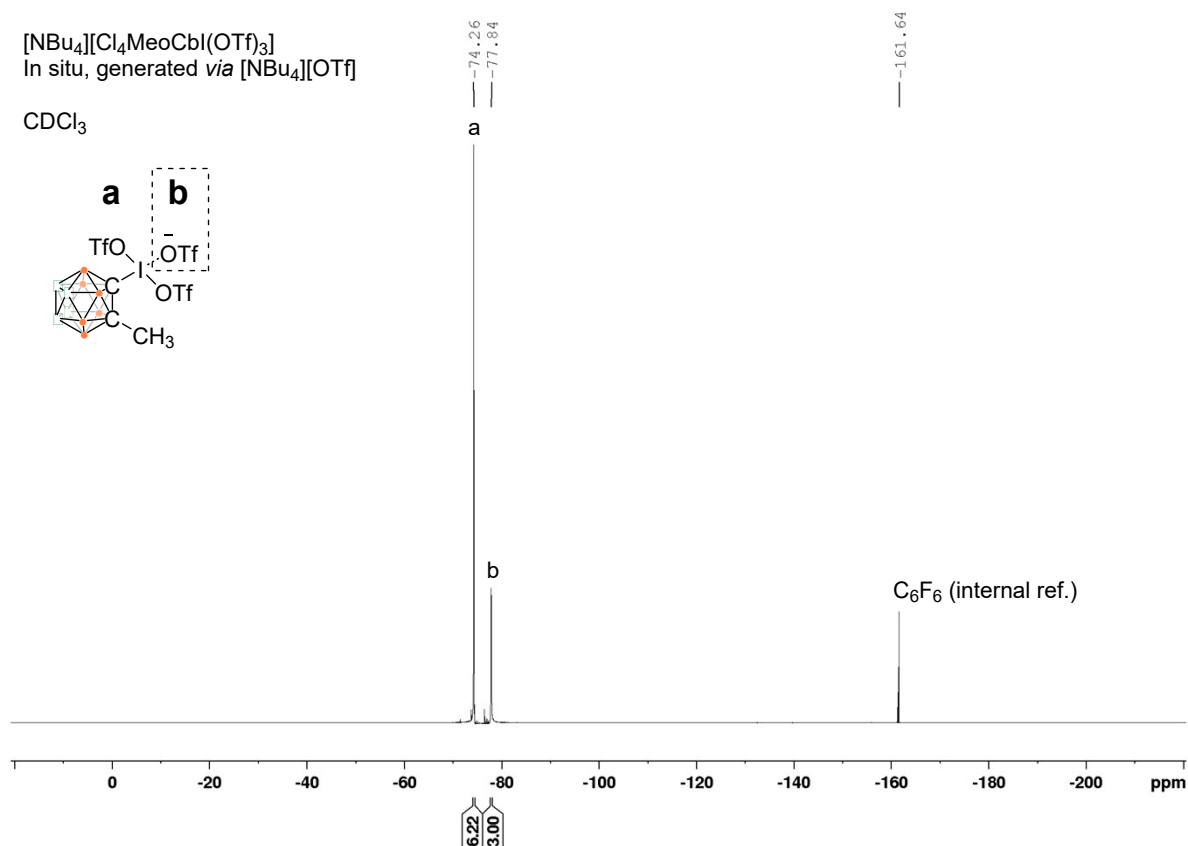

Figure S71.  $^{19}\text{F}$  NMR ( $\text{CDCl}_3$ , 470 MHz):  $[\text{NBu}_4][\text{Cl}_4\text{MeoCb-I}(\text{OTf})_3]$  generated *via*  $[\text{NBu}_4][\text{OTf}]$ .

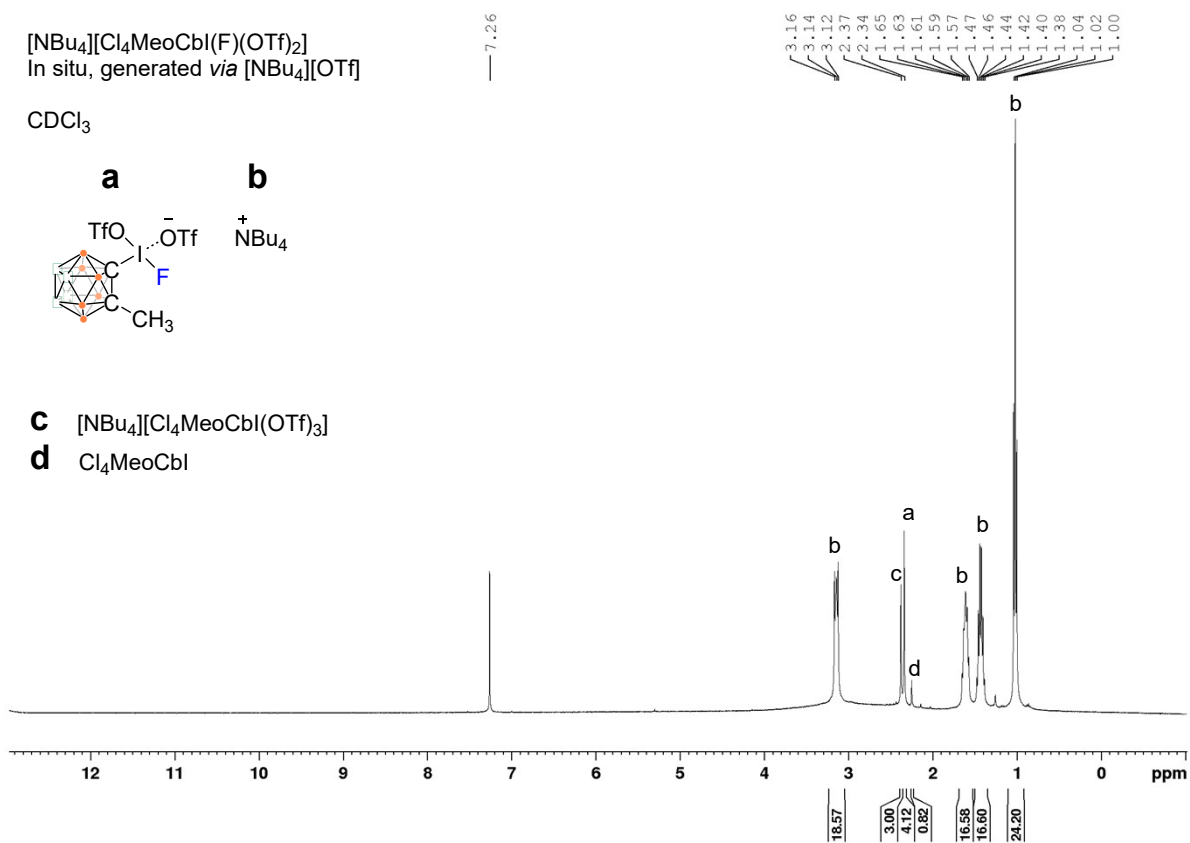

Figure S72.  $^1\text{H}$  NMR ( $\text{CDCl}_3$ , 400 MHz):  $[\text{NBu}_4][\text{Cl}_4\text{MeoCb-I}(\text{F})(\text{OTf})_2]$  generated via  $[\text{NBu}_4][\text{OTf}]$ .

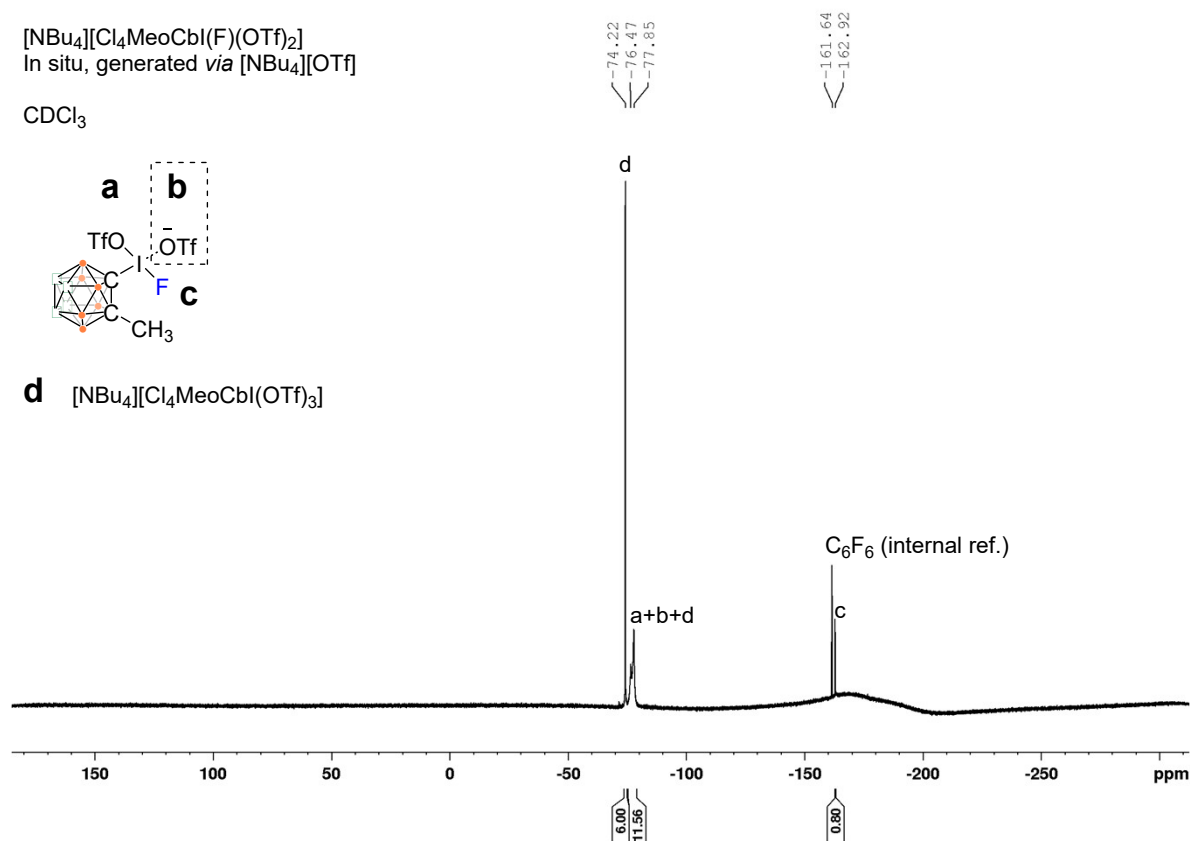

Figure S73.  $^{19}\text{F}$  NMR ( $\text{CDCl}_3$ , 376 MHz):  $[\text{NBu}_4][\text{Cl}_4\text{MeoCb-I}(\text{F})(\text{OTf})_2]$  generated via  $[\text{NBu}_4][\text{OTf}]$ .

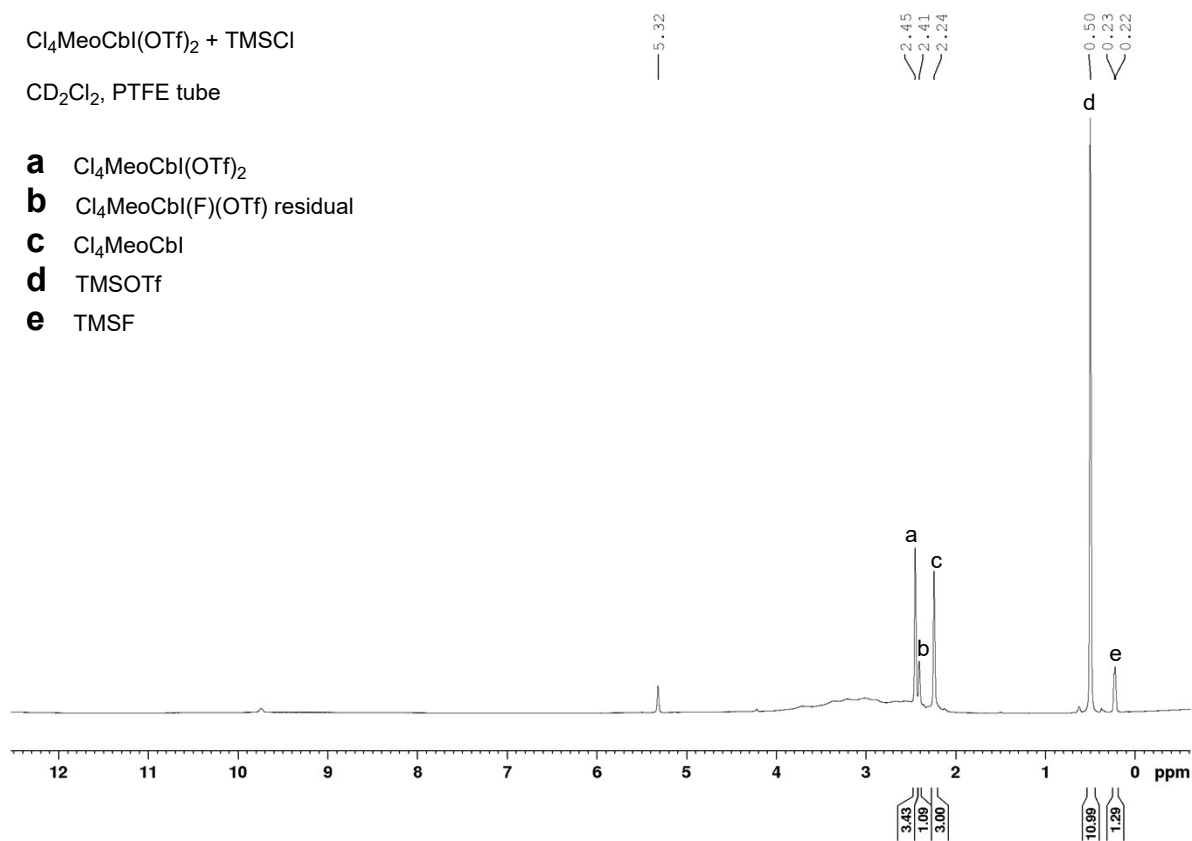

Figure S74. <sup>1</sup>H NMR (CD<sub>2</sub>Cl<sub>2</sub>, PTFE tube, 500 MHz): Cl<sub>4</sub>MeoCb-I(OTf)<sub>2</sub> + TMSCl.

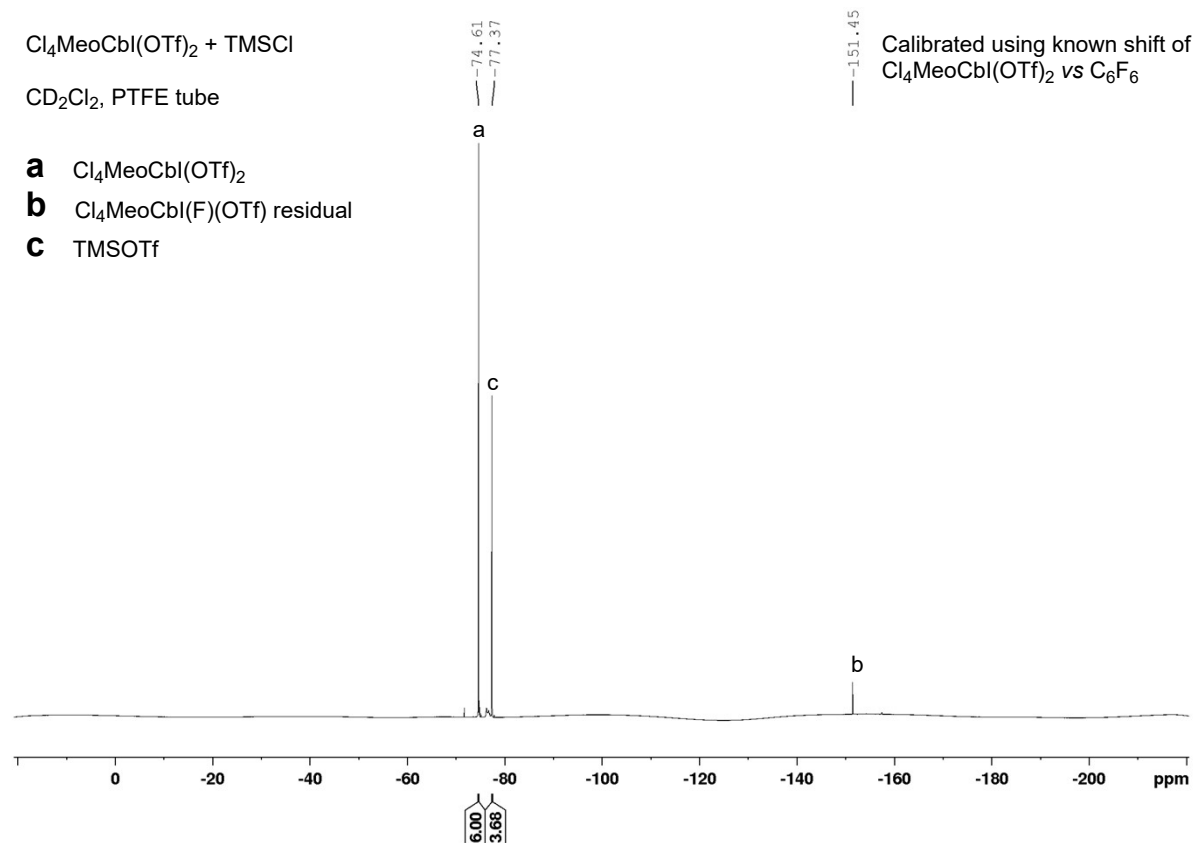

Figure S75. <sup>19</sup>F NMR (CD<sub>2</sub>Cl<sub>2</sub>, PTFE tube, 470 MHz): Cl<sub>4</sub>MeoCb-I(OTf)<sub>2</sub> + TMSCl.

TMSOTf  
Standard, commercially obtained  
CD<sub>2</sub>Cl<sub>2</sub>

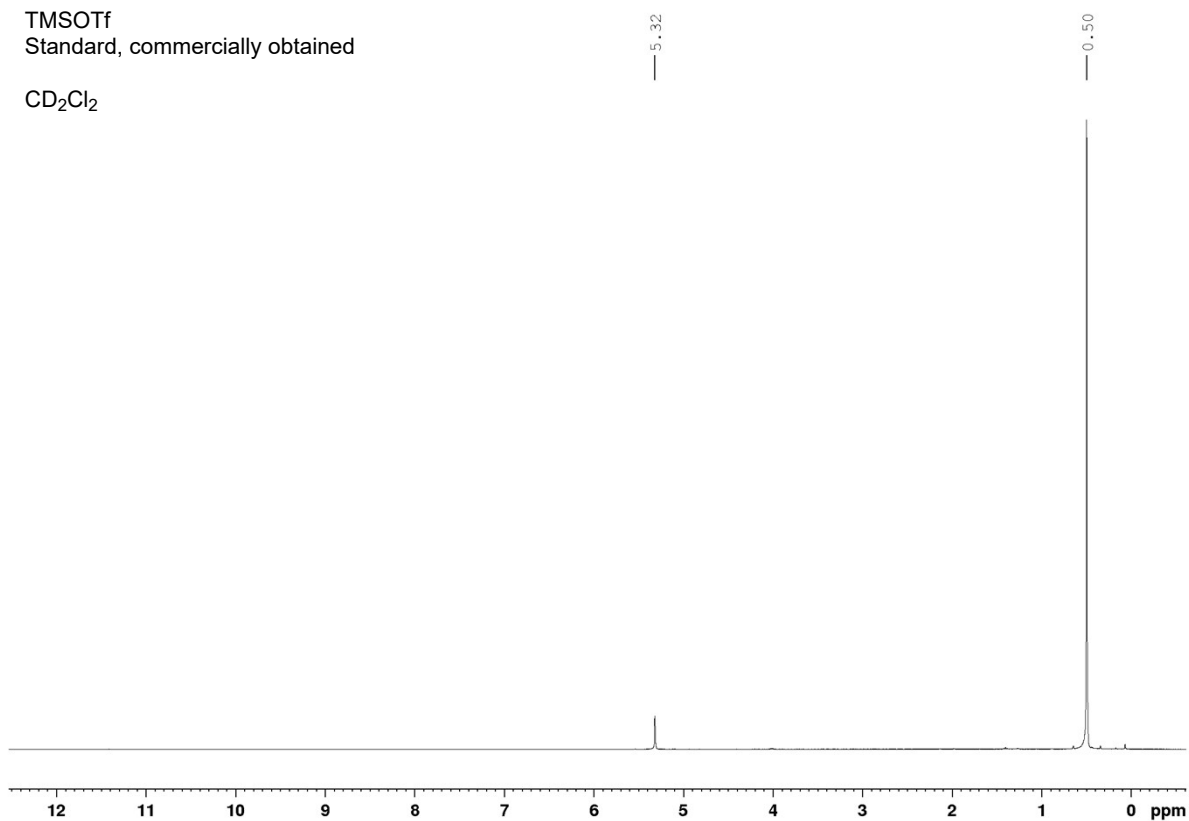

Figure S76. <sup>1</sup>H NMR (CD<sub>2</sub>Cl<sub>2</sub>, 400 MHz): TMSOTf.

TMSOTf  
Standard, commercially obtained  
CD<sub>2</sub>Cl<sub>2</sub>

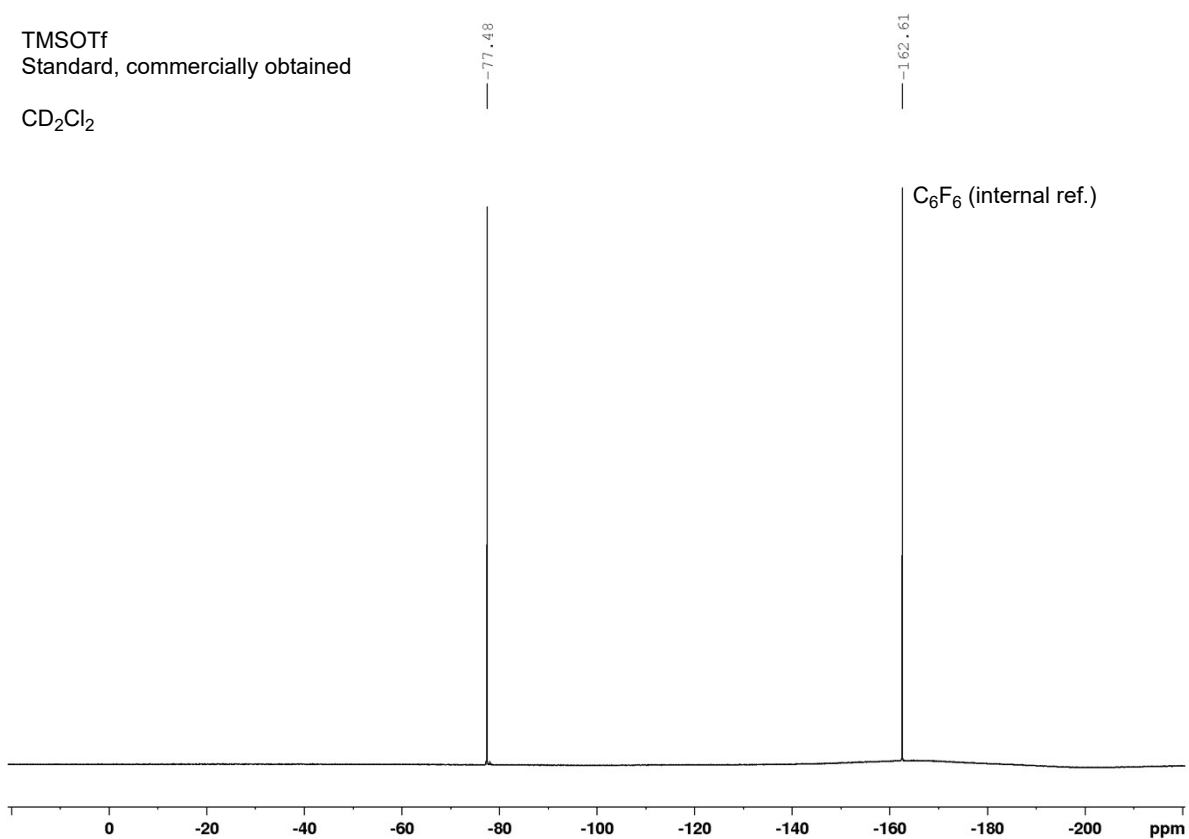

Figure S77. <sup>19</sup>F NMR (CD<sub>2</sub>Cl<sub>2</sub>, 376 MHz): TMSOTf.

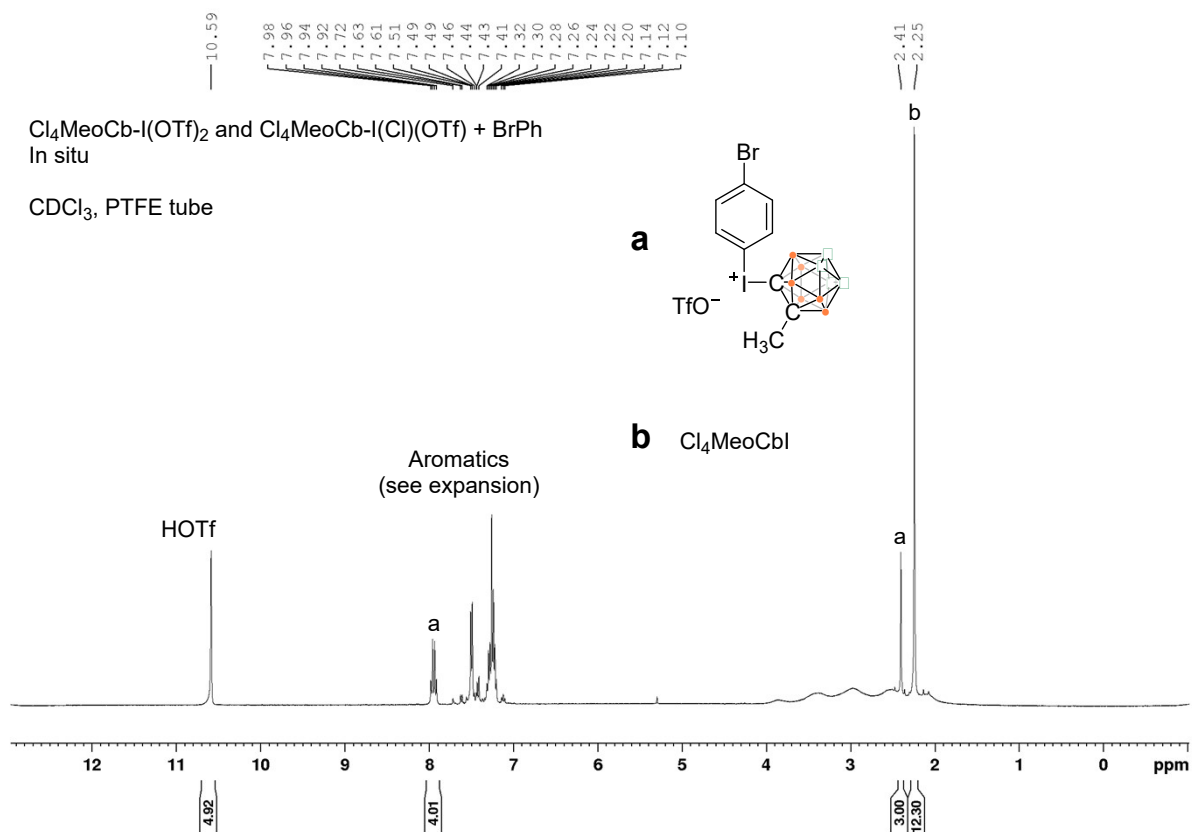

Figure S78.  $^1\text{H}$  NMR ( $\text{CDCl}_3$ , 400 MHz): Reaction of  $\text{Cl}_4\text{MeoCb-I}(\text{OTf})_2$  and  $\text{Cl}_4\text{MeoCb-I}(\text{Cl})(\text{OTf})$  with BrPh to probe for chlorination (spectrum 1 of 2: full). Baseline correction used for integrals that overlap with BH signals. See Figure S79 for aromatic region expansion.

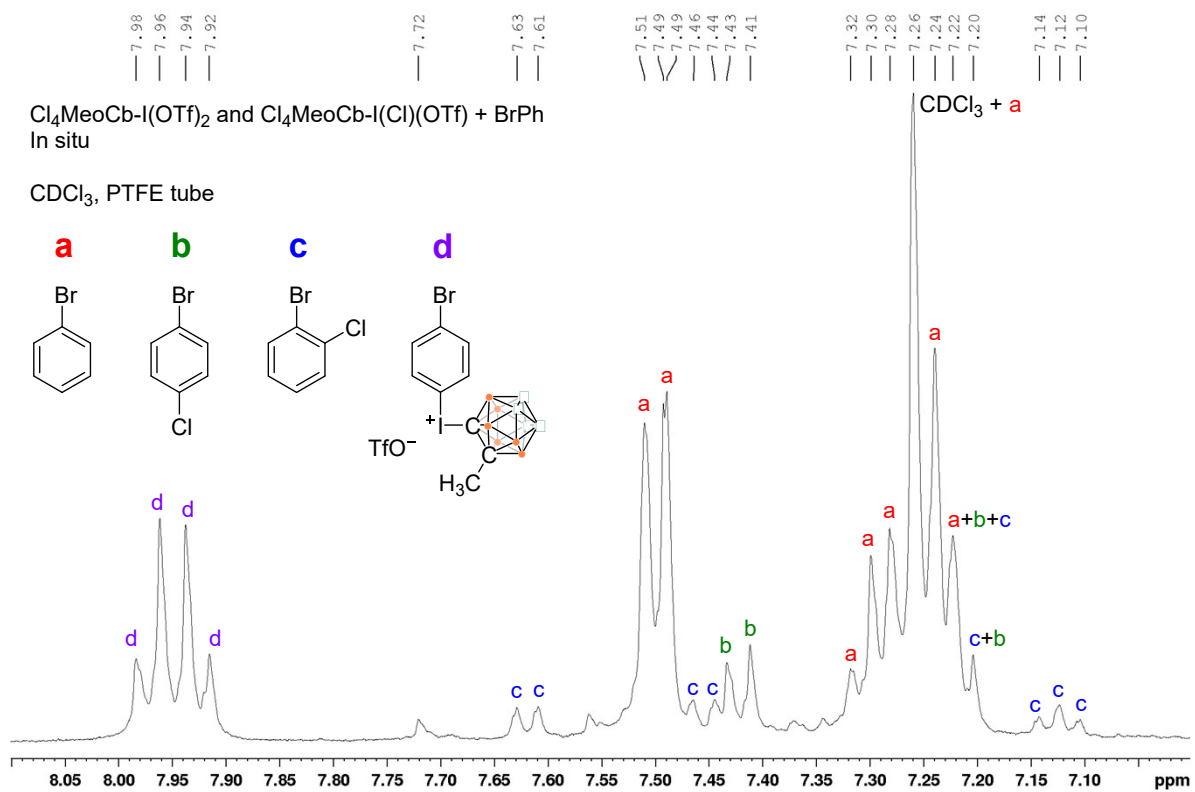

Figure S79.  $^1\text{H}$  NMR ( $\text{CDCl}_3$ , PTFE tube, 400 MHz): Reaction of  $\text{Cl}_4\text{MeoCb-I}(\text{OTf})_2$  and  $\text{Cl}_4\text{MeoCb-I}(\text{Cl})(\text{OTf})$  with BrPh to probe for chlorination (spectrum 2 of 2: aromatics).

Cl<sub>4</sub>MeoCb-I(OTf)<sub>2</sub> and  
Cl<sub>4</sub>MeoCb-I(Cl)(OTf) + BrPh  
In situ

CDCl<sub>3</sub>, PTFE tube

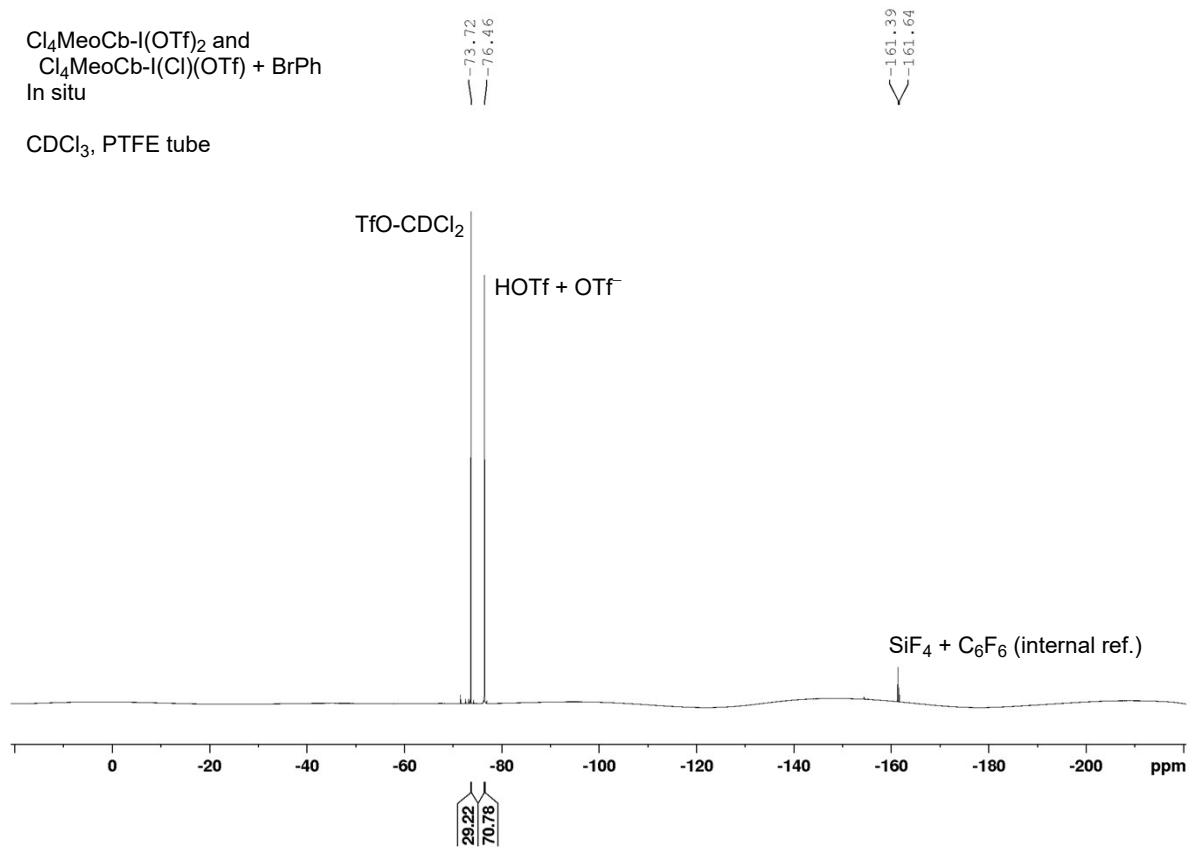

Figure S80. <sup>19</sup>F NMR (CDCl<sub>3</sub>, PTFE tube, 470 MHz): Reaction of Cl<sub>4</sub>MeoCb-I(OTf)<sub>2</sub> and Cl<sub>4</sub>MeoCb-I(Cl)(OTf) with BrPh to probe for chlorination.

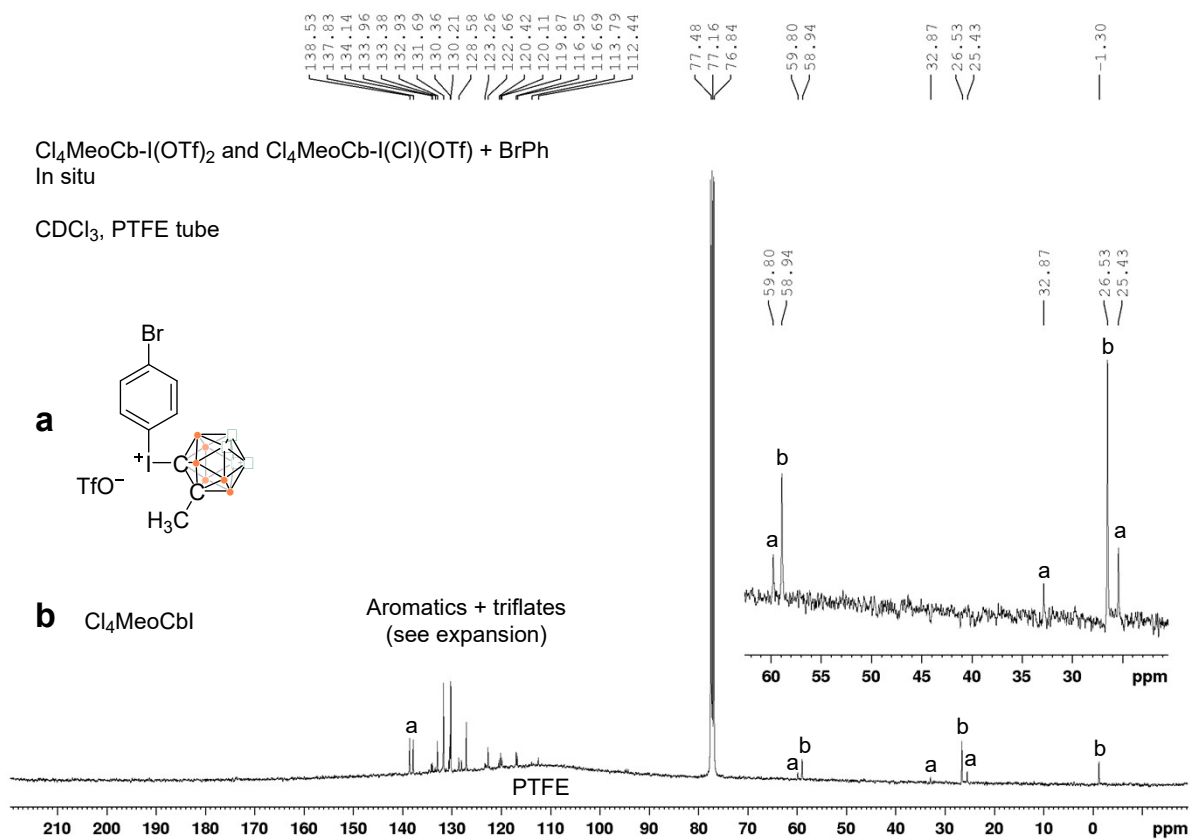

Figure S81.  $^{13}\text{C}\{^1\text{H}\}$  NMR ( $\text{CDCl}_3$ , 101 MHz): Reaction of  $\text{Cl}_4\text{MeoCb-I(OTf)}_2$  and  $\text{Cl}_4\text{MeoCb-I(Cl)(OTf)}$  with BrPh to probe for chlorination (spectrum 1 of 2: full). 5 Hz line broadening to resolve multiplet oCb signals. See Figure S82 for aromatic and triflate region expansion.

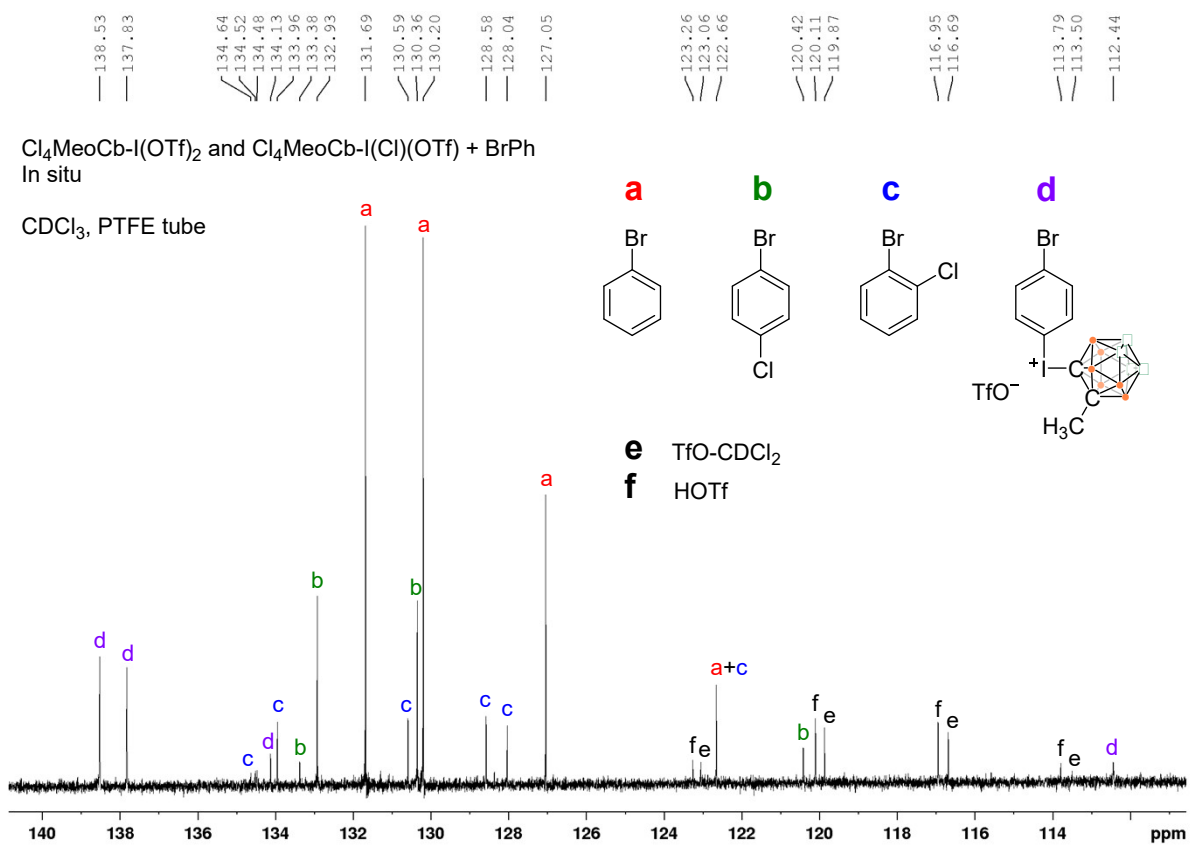

Figure S82.  $^{13}\text{C}\{^1\text{H}\}$  NMR (CDCl<sub>3</sub>, 101 MHz): Reaction of Cl<sub>4</sub>MeoCb-I(OTf)<sub>2</sub> and Cl<sub>4</sub>MeoCb-I(Cl)(OTf) with BrPh to probe for chlorination (spectrum 2 of 2: aromatics + triflates).

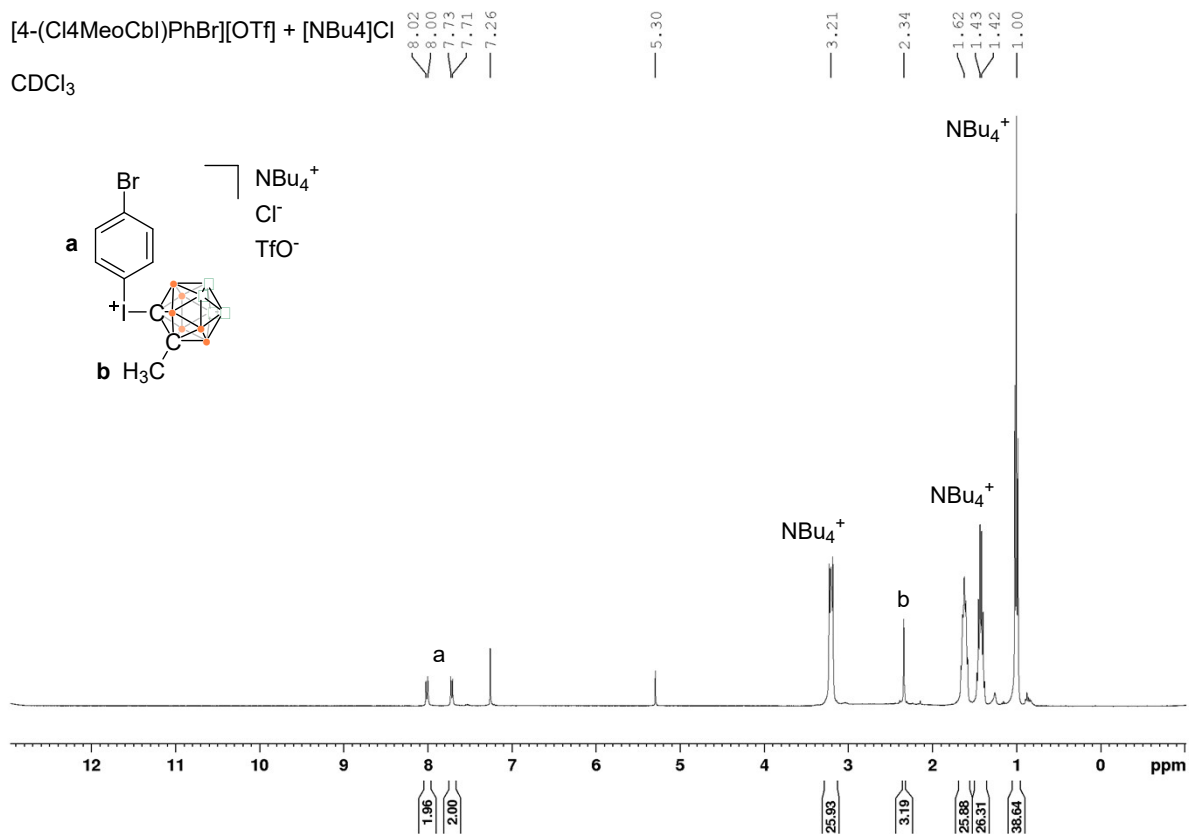

Figure S83. <sup>1</sup>H NMR (CDCl<sub>3</sub>, 400 MHz): [4-(Cl<sub>4</sub>MeoCbl)PhBr][OTf] + [NBu<sub>4</sub>]Cl.

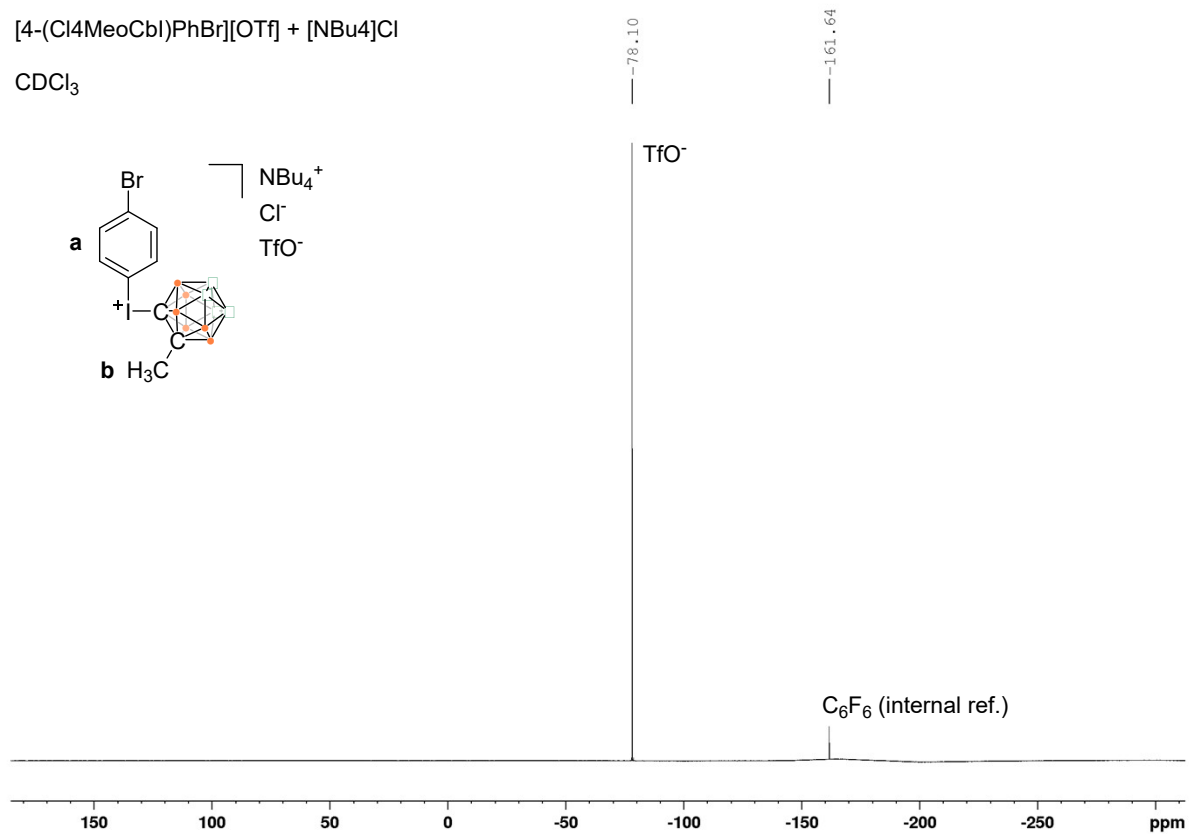

Figure S84. <sup>19</sup>F NMR (CDCl<sub>3</sub>, 376 MHz): [4-(Cl<sub>4</sub>MeoCbl)PhBr][OTf] + [NBu<sub>4</sub>]Cl.

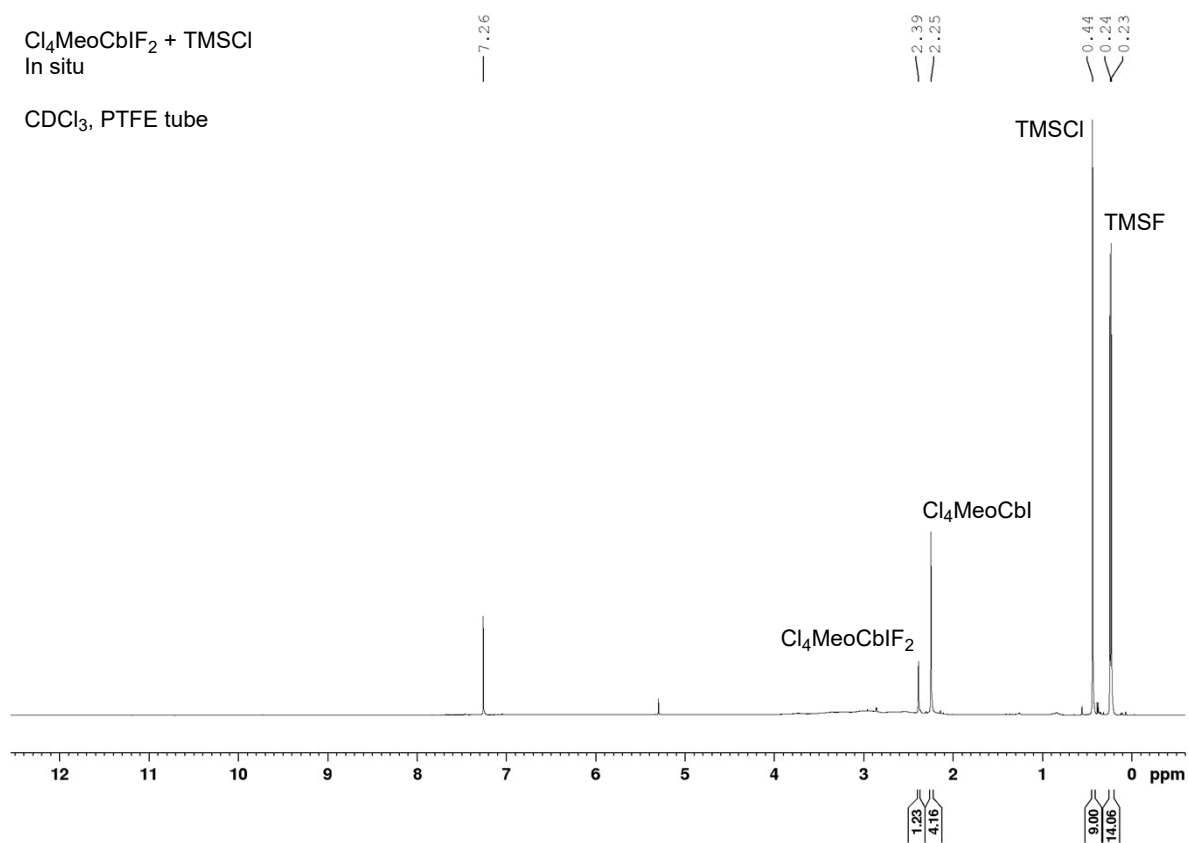

Figure S85. <sup>1</sup>H NMR (CDCl<sub>3</sub>, 500 MHz): Reaction of Cl<sub>4</sub>MeoCb-IF<sub>2</sub> with TMSCl.

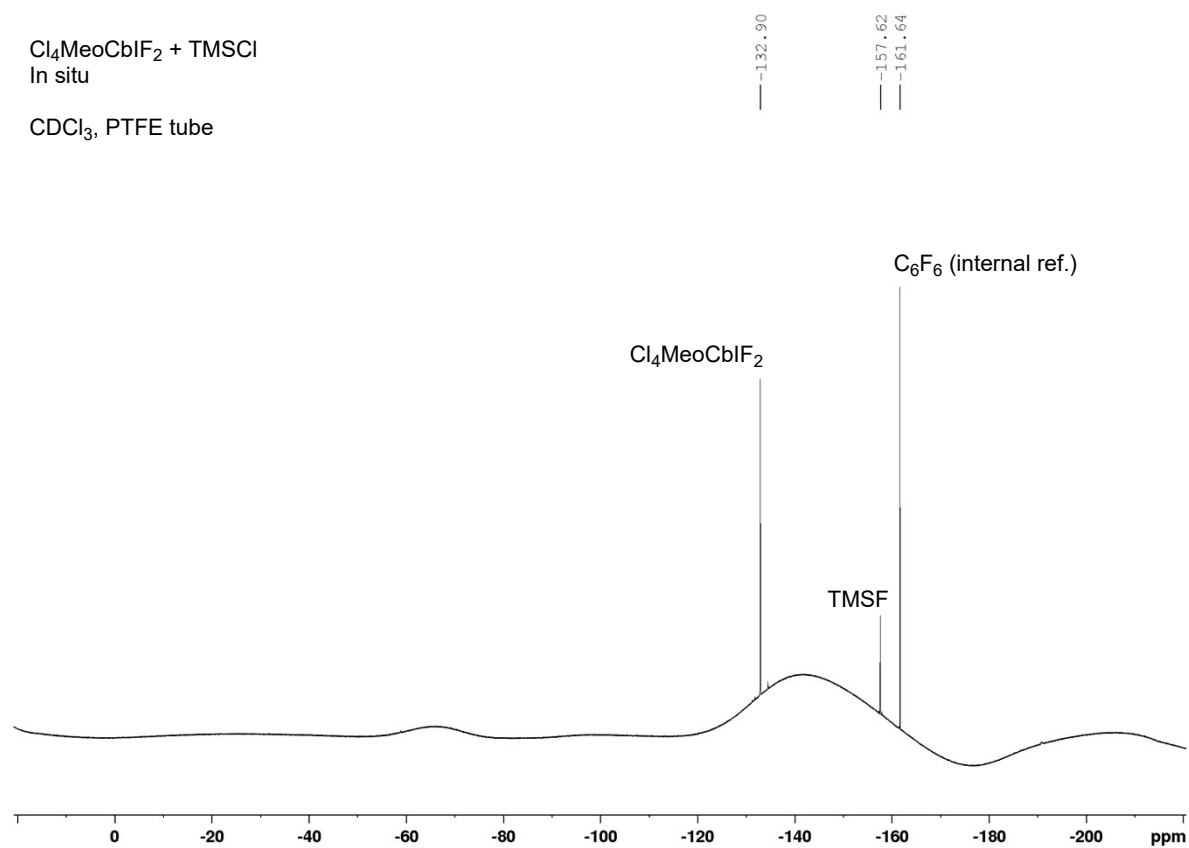

Figure S86. <sup>19</sup>F NMR (CDCl<sub>3</sub>, 470 MHz): Reaction of Cl<sub>4</sub>MeoCb-IF<sub>2</sub> with TMSCl.

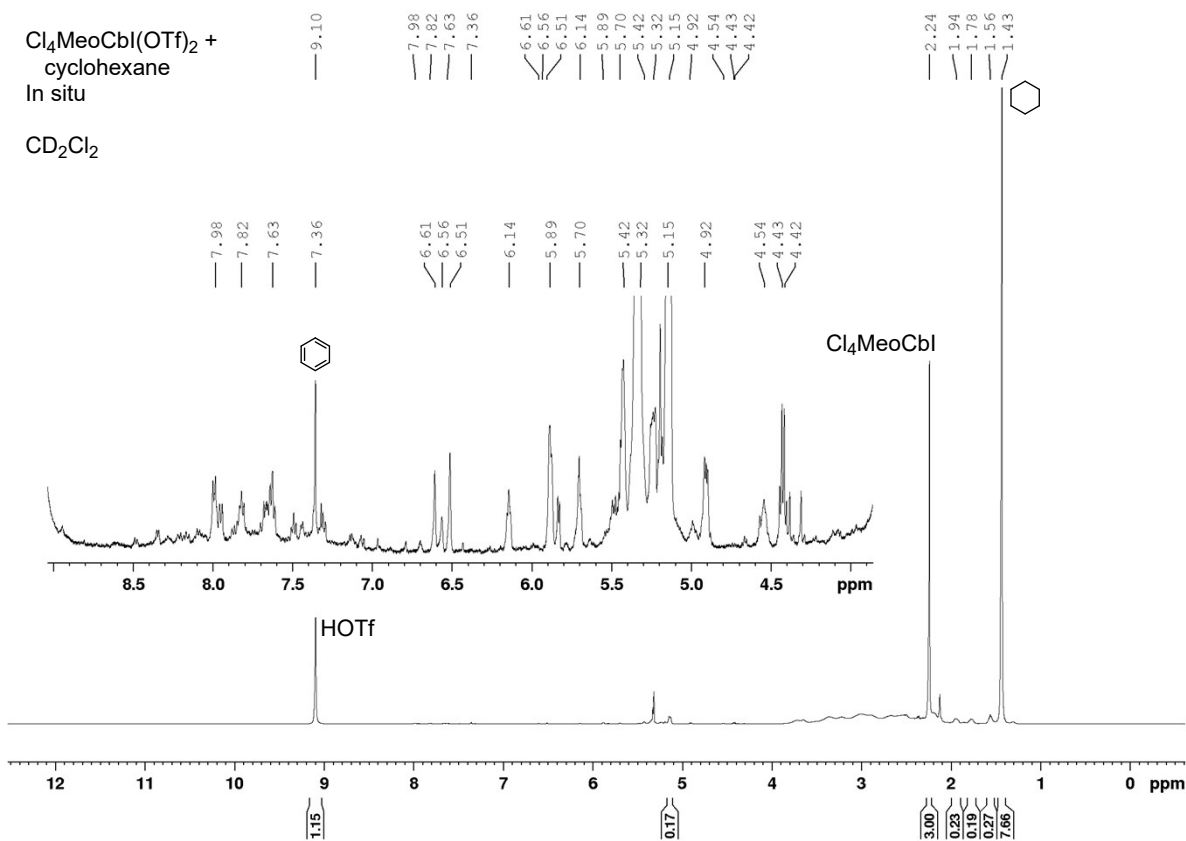

Figure S87.  $^1\text{H}$  NMR ( $\text{CD}_2\text{Cl}_2$ , 500 MHz): Reaction of  $\text{Cl}_4\text{MeoCb-I}(\text{OTf})_2$  with cyclohexane.

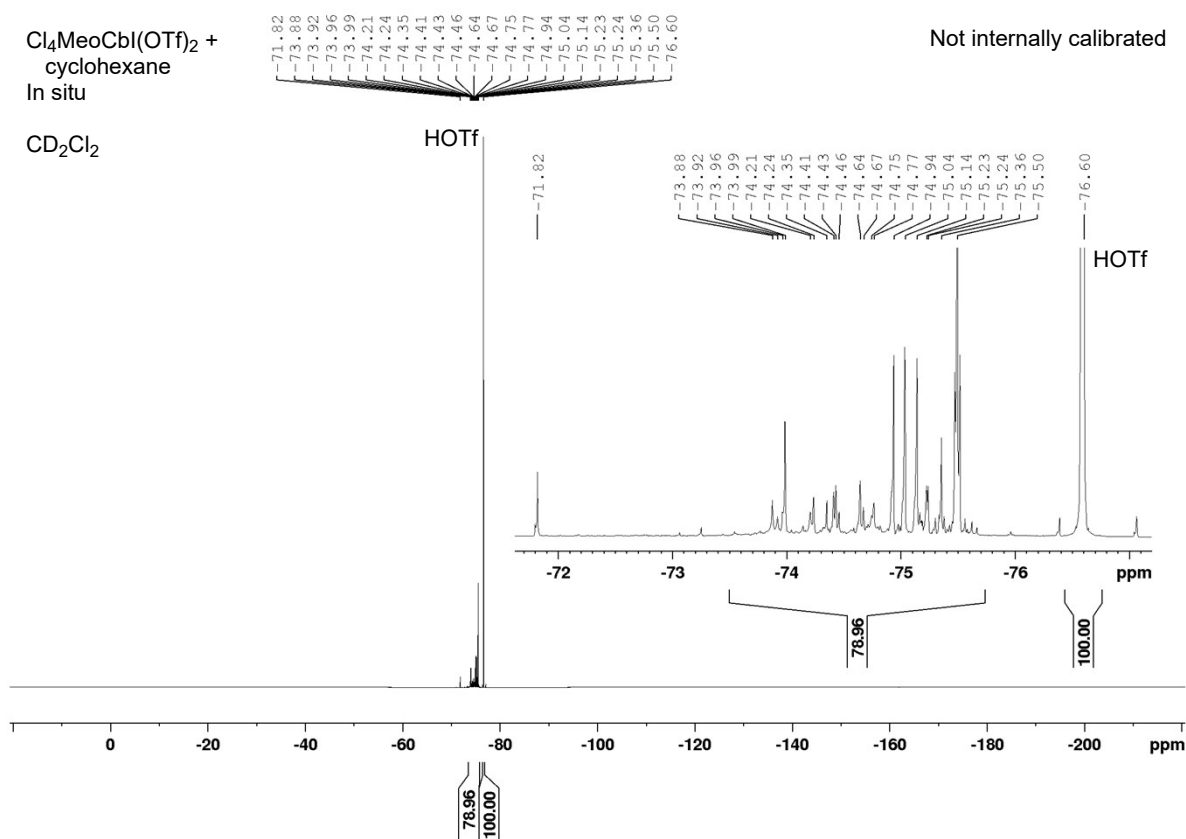

Figure S88.  $^{19}\text{F}$  NMR ( $\text{CD}_2\text{Cl}_2$ , 470 MHz): Reaction of  $\text{Cl}_4\text{MeoCb-I}(\text{OTf})_2$  with cyclohexane.

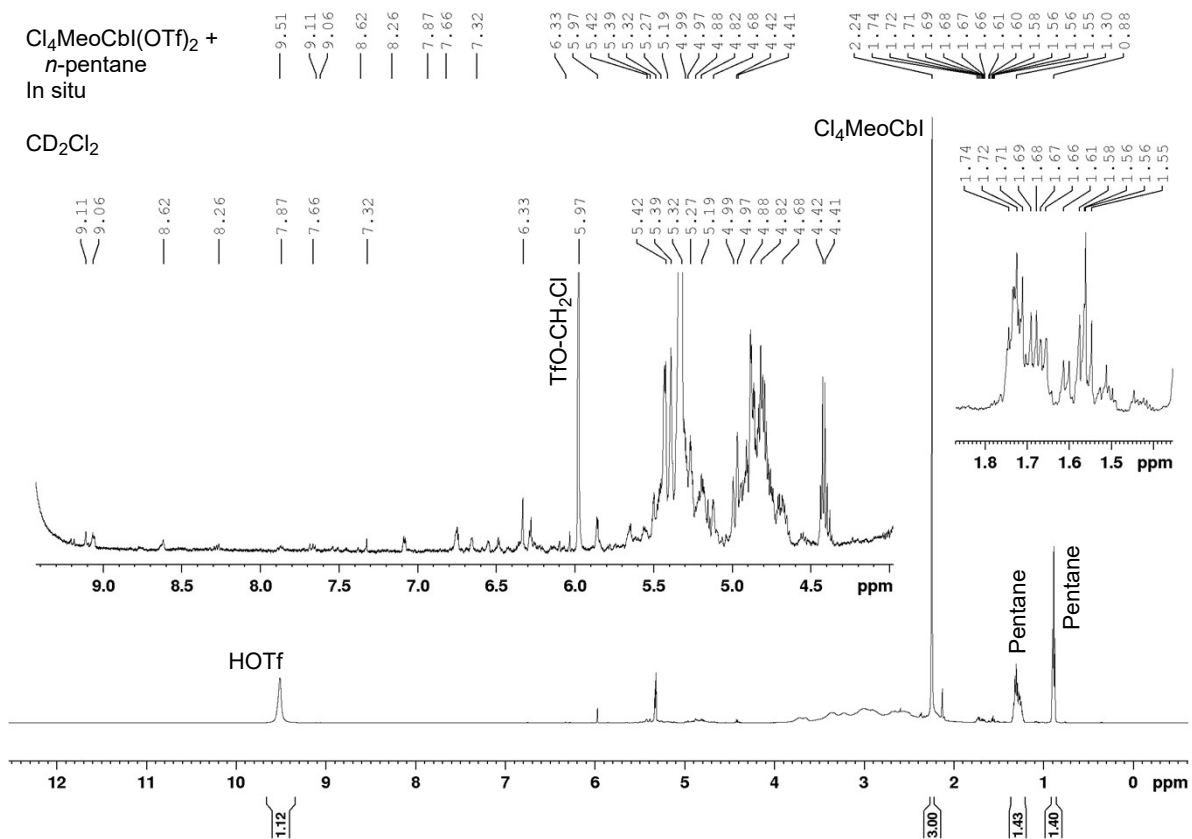

Figure S89.  $^1\text{H}$  NMR ( $\text{CD}_2\text{Cl}_2$ , 500 MHz): Reaction of  $\text{Cl}_4\text{MeoCb-I}(\text{OTf})_2$  with  $n$ -pentane.

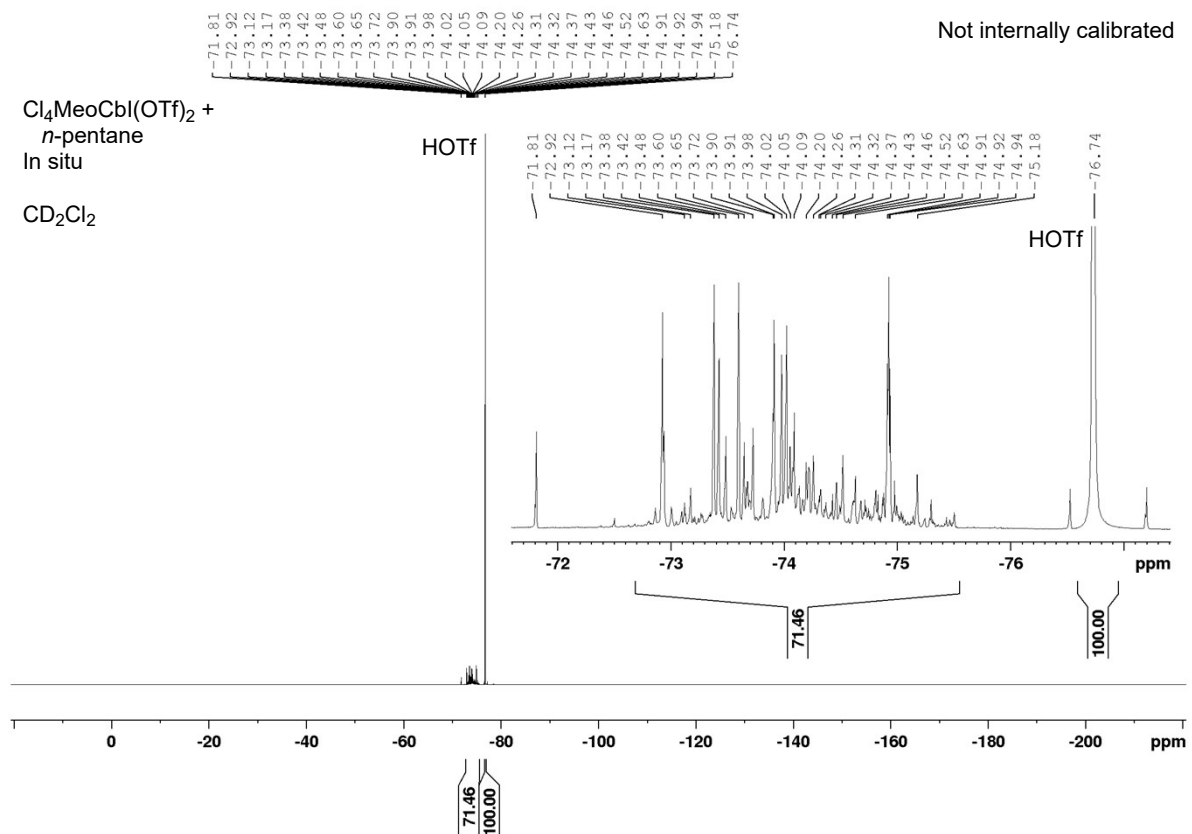

Figure S90.  $^{19}\text{F}$  NMR ( $\text{CD}_2\text{Cl}_2$ , 470 MHz): Reaction of  $\text{Cl}_4\text{MeoCb-I}(\text{OTf})_2$  with  $n$ -pentane.

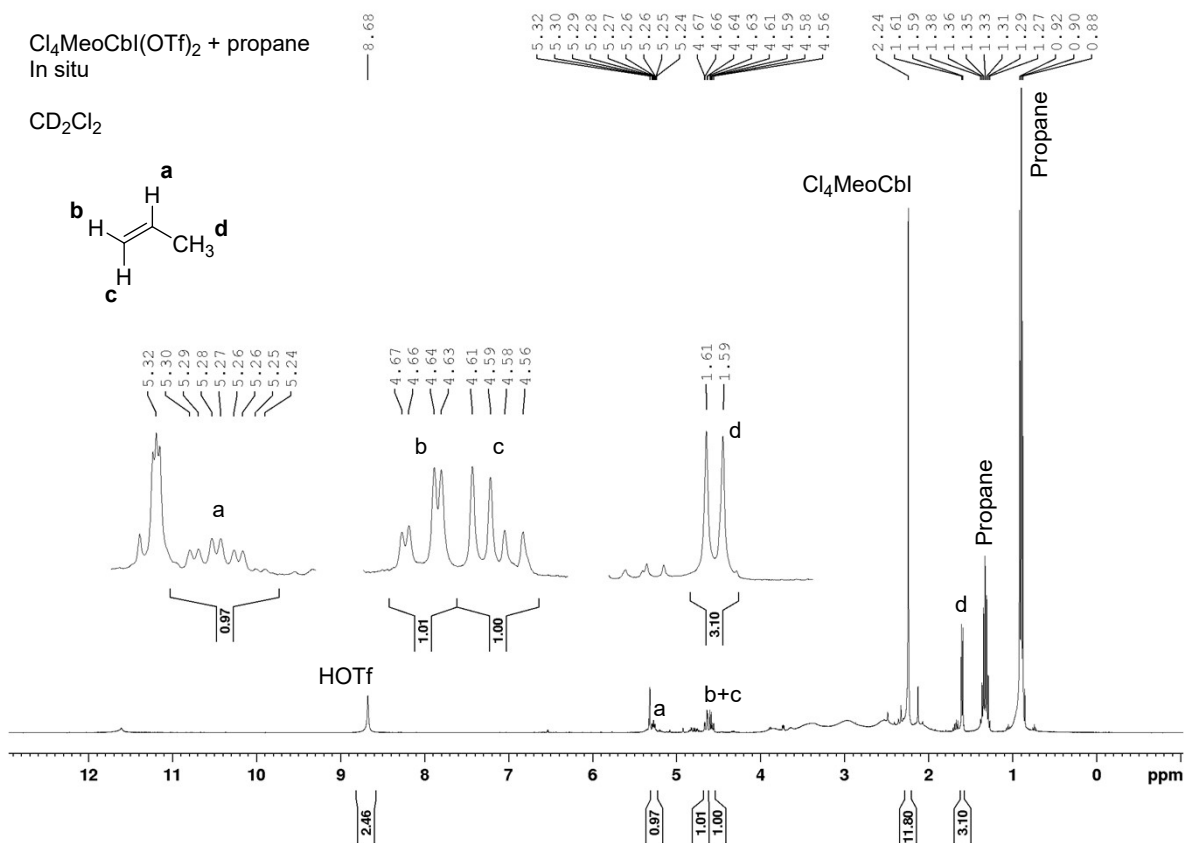

Figure S91. <sup>1</sup>H NMR (CD<sub>2</sub>Cl<sub>2</sub>, 400 MHz): Reaction of Cl<sub>4</sub>MeoCb-I(OTf)<sub>2</sub> with propane.

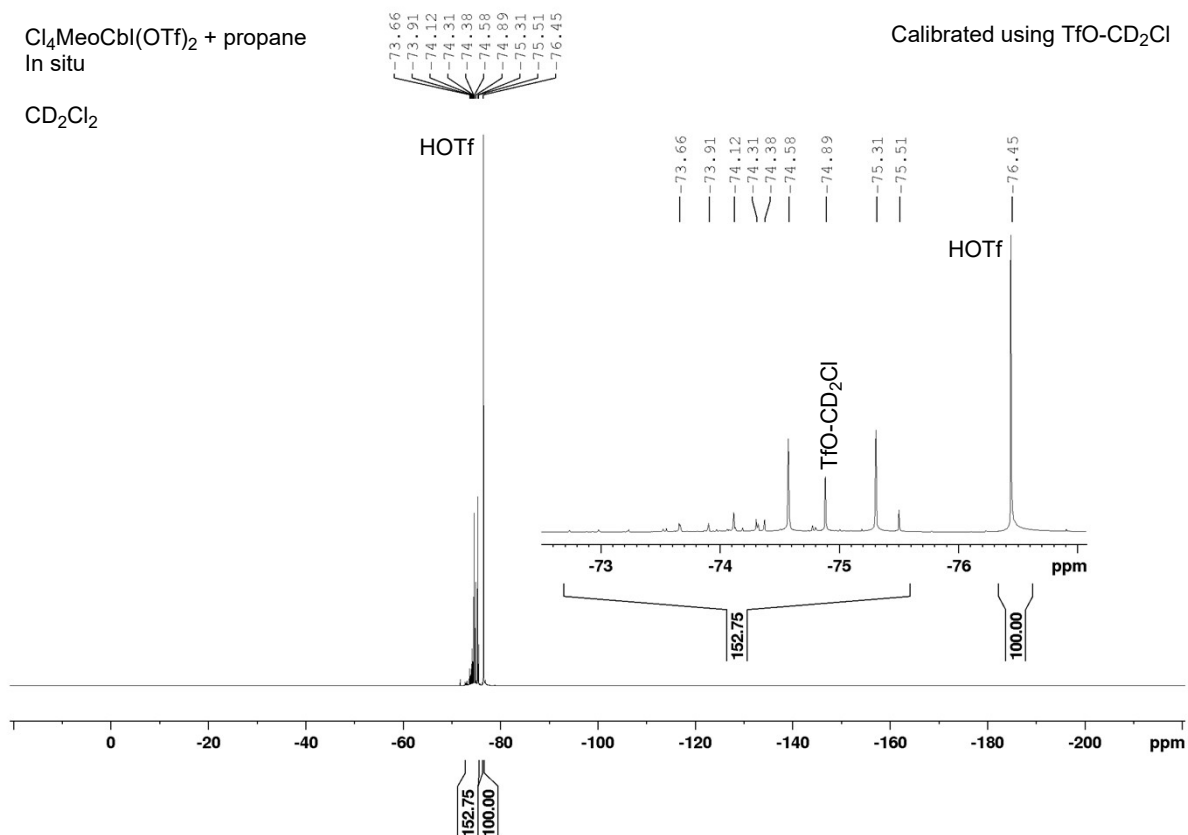

Figure S92. <sup>19</sup>F NMR (CD<sub>2</sub>Cl<sub>2</sub>, 470 MHz): Reaction of Cl<sub>4</sub>MeoCb-I(OTf)<sub>2</sub> with propane.

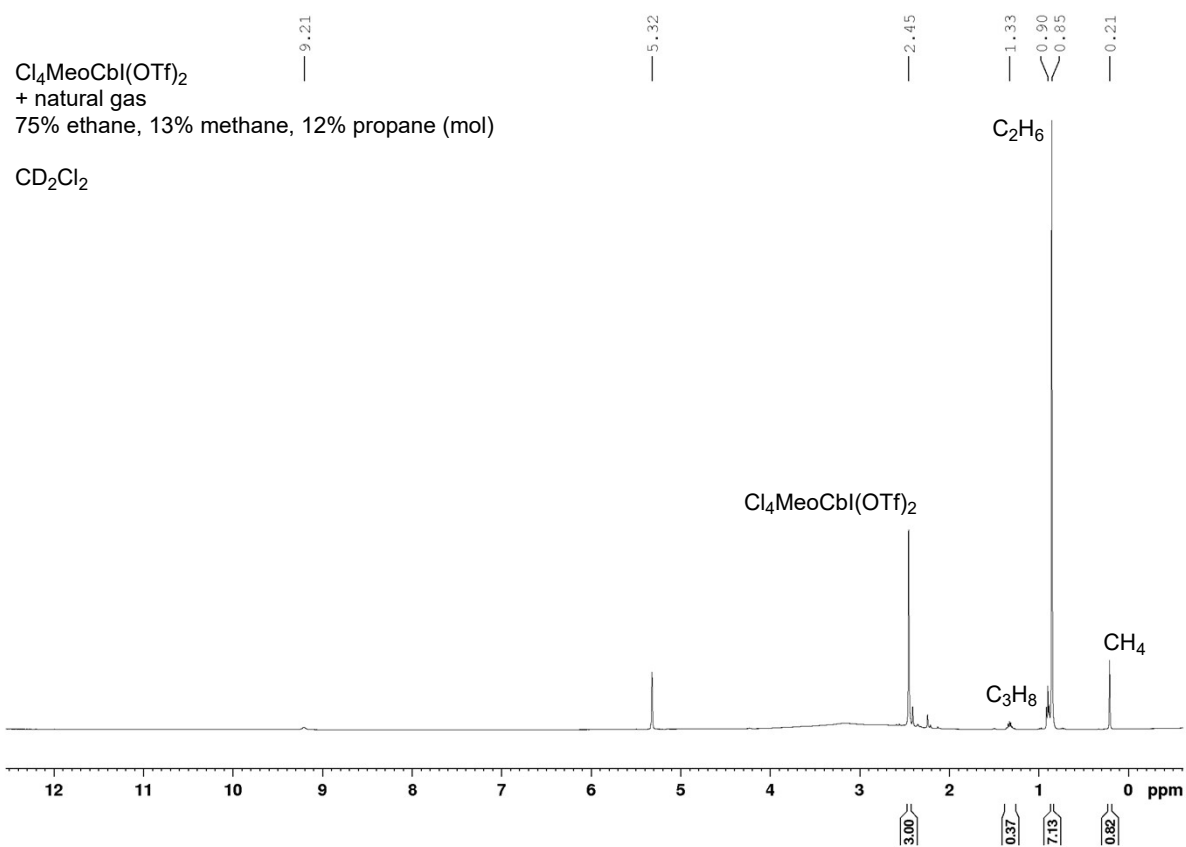

Figure S93.  $^1\text{H}$  NMR ( $\text{CD}_2\text{Cl}_2$ , 500 MHz):  $\text{Cl}_4\text{MeoCb-I}(\text{OTf})_2$  + natural gas.

## Mass Spectra

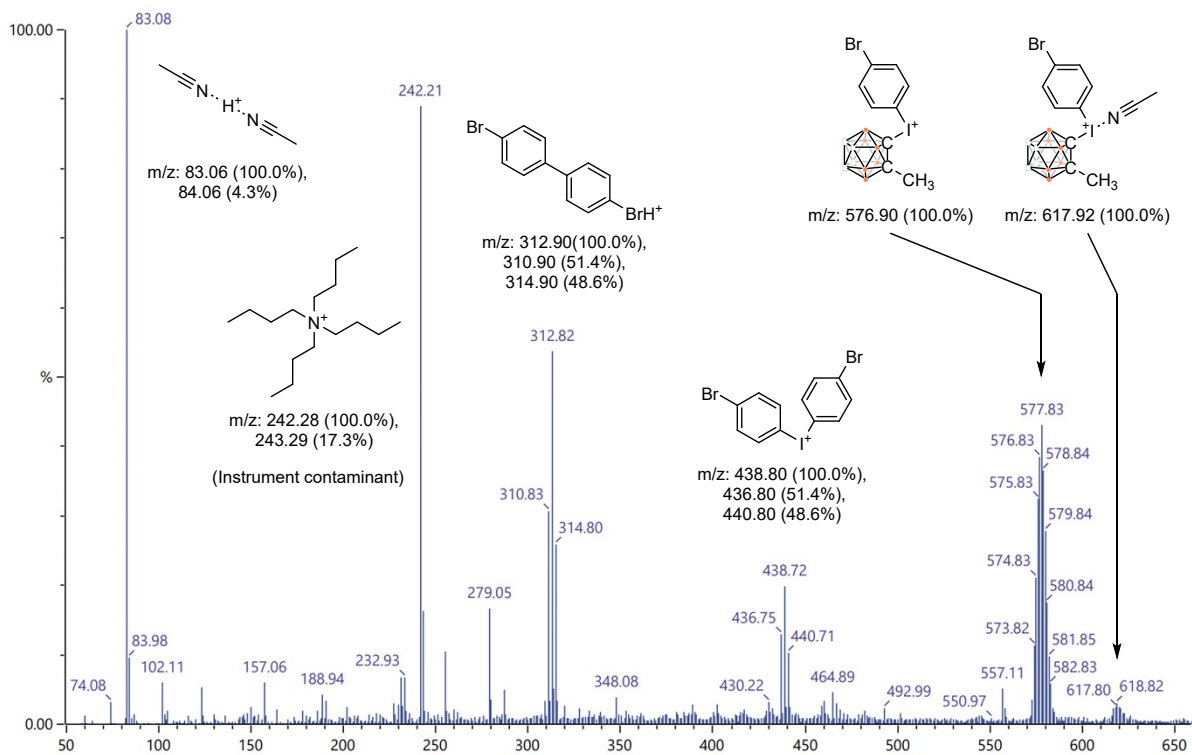

Figure S94. Mass spectrum of  $\text{Cl}_4\text{MeoCb-I}(\text{OTf})_2 + \text{BrPh}$  reaction mixture. Acetonitrile carrier solvent. Calculated m/z values are displayed beneath each structure.

## Computational Details

Geometry optimizations and frequency calculations were performed with Gaussian 16 Rev. C.01<sup>[11]</sup> at the DFT level using the LC- $\omega$ HPBE<sup>[12]</sup> functional and the def2-TZVP basis set<sup>[13]</sup> in the gas phase. Default convergence criteria were applied unless stated otherwise. All optimized structures were confirmed as minima by the absence of imaginary frequencies.

Single-point energies were computed on the optimized geometries using ORCA 6.1<sup>[14]</sup> at the RI-MP2/def2-TZVP<sup>[13,15]</sup> level of theory. Solvent effects were included via the CPCM<sup>[16]</sup> model with chloroform parameters. The resolution-of-identity approximation (RIJCOSX) was employed, using the def2/J<sup>[17]</sup> auxiliary basis set for the Coulomb term and the COSX approximation for Hartree–Fock exchange. MP2 correlation energies were computed using RI-MP2 with the def2-TZVP/C<sup>[18]</sup> auxiliary basis set. Thermochemical energies were computed at 298 K and 1 atm.

Cartesian coordinates are reported in Å and electronic energies in Hartree.

### CHCl<sub>3</sub>

E (CPCM/RI-MP2/def2-TZVP): -1417.706964

E (LC- $\omega$ HPBE/def2-TZVP): -1418.9451610

|    |              |              |              |
|----|--------------|--------------|--------------|
| C  | 0.000003000  | -0.000043000 | 0.451585000  |
| H  | -0.000042000 | -0.000198000 | 1.535864000  |
| Cl | -1.302276000 | -1.036783000 | -0.083250000 |
| Cl | 1.549080000  | -0.609334000 | -0.083245000 |
| Cl | -0.246802000 | 1.646143000  | -0.083232000 |

### Cl<sub>2</sub>

E (CPCM/RI-MP2/def2-TZVP): -919.3563806

E (LC- $\omega$ HPBE/def2-TZVP): -920.1369800

|    |             |             |              |
|----|-------------|-------------|--------------|
| Cl | 0.000000000 | 0.000000000 | 0.982311000  |
| Cl | 0.000000000 | 0.000000000 | -0.982311000 |

### HOTf

E (CPCM/RI-MP2/def2-TZVP): -960.9054728

E (LC- $\omega$ HPBE/def2-TZVP): -961.9158520

|   |              |              |              |
|---|--------------|--------------|--------------|
| S | -0.848114000 | -0.135563000 | 0.074240000  |
| O | -1.240355000 | 1.034007000  | -0.896057000 |
| H | -1.388914000 | 1.846408000  | -0.390254000 |
| O | -1.228813000 | 0.209300000  | 1.395130000  |

|   |              |              |              |
|---|--------------|--------------|--------------|
| O | -1.196317000 | -1.350074000 | -0.550749000 |
| C | 0.980827000  | 0.005112000  | -0.002769000 |
| F | 1.407904000  | -0.206692000 | -1.235813000 |
| F | 1.512586000  | -0.890280000 | 0.812164000  |
| F | 1.345917000  | 1.224312000  | 0.382808000  |

**Cl<sub>4</sub>MeoCbl**

E (CPCM/RI-MP2/def2-TZVP): -2503.603256

E (LC- $\omega$ HPBE/def2-TZVP): -2506.5070970

|    |              |              |              |
|----|--------------|--------------|--------------|
| B  | -1.136881000 | -1.445831000 | 0.063854000  |
| B  | 0.529671000  | -1.425723000 | 0.615234000  |
| C  | 1.191341000  | 0.000022000  | -0.020146000 |
| I  | 3.231262000  | -0.000010000 | -0.425263000 |
| B  | 0.148079000  | -0.879469000 | -1.012223000 |
| B  | -1.385302000 | -0.000032000 | -0.958106000 |
| B  | -1.136907000 | 1.445831000  | 0.063766000  |
| Cl | -1.982052000 | 2.974320000  | -0.216159000 |
| B  | -1.943814000 | 0.000017000  | 0.737764000  |
| B  | -0.740765000 | -0.877284000 | 1.691370000  |
| C  | 0.689158000  | 0.000052000  | 1.536740000  |
| C  | 1.711957000  | 0.000101000  | 2.643650000  |
| H  | 2.340904000  | -0.886336000 | 2.593288000  |
| H  | 1.187642000  | -0.000013000 | 3.596970000  |
| H  | 2.340708000  | 0.886682000  | 2.593392000  |
| B  | -0.740755000 | 0.877381000  | 1.691320000  |
| H  | -0.923534000 | 1.476786000  | 2.692273000  |
| B  | 0.529652000  | 1.425783000  | 0.615126000  |
| H  | 1.253453000  | 2.324628000  | 0.854939000  |
| B  | 0.148063000  | 0.879437000  | -1.012291000 |
| H  | 0.599570000  | 1.477760000  | -1.923608000 |
| H  | -0.923535000 | -1.476615000 | 2.692369000  |
| Cl | -3.652790000 | 0.000026000  | 1.178619000  |
| Cl | -2.494637000 | -0.000091000 | -2.330723000 |
| H  | 0.599543000  | -1.477875000 | -1.923506000 |
| H  | 1.253510000  | -2.324536000 | 0.855050000  |
| Cl | -1.981997000 | -2.974346000 | -0.216018000 |

**Cl<sub>4</sub>MeoCbIF<sub>2</sub>**

E (CPCM/RI-MP2/def2-TZVP): -2703.000683

E (LC- $\omega$ HPBE/def2-TZVP): -2706.1085120

|    |              |              |              |
|----|--------------|--------------|--------------|
| B  | -1.421812000 | -1.446964000 | -0.179338000 |
| B  | 0.232819000  | -1.553506000 | 0.397569000  |
| C  | 0.915029000  | -0.043608000 | 0.028709000  |
| I  | 2.980122000  | 0.078504000  | -0.332582000 |
| F  | 3.101438000  | -1.831765000 | 0.090835000  |
| F  | 2.705995000  | 1.975861000  | -0.684988000 |
| B  | -0.111279000 | -0.729283000 | -1.123594000 |
| B  | -1.634117000 | 0.153778000  | -0.942740000 |
| B  | -1.382818000 | 1.405187000  | 0.314680000  |
| Cl | -2.206084000 | 2.968121000  | 0.283643000  |
| B  | -2.221903000 | -0.122592000 | 0.718348000  |

|    |              |              |              |
|----|--------------|--------------|--------------|
| B  | -1.049708000 | -1.167084000 | 1.530494000  |
| C  | 0.391900000  | -0.301900000 | 1.556018000  |
| C  | 1.403454000  | -0.512638000 | 2.654124000  |
| H  | 2.098907000  | -1.308955000 | 2.393511000  |
| H  | 0.872884000  | -0.802329000 | 3.558604000  |
| H  | 1.954402000  | 0.403613000  | 2.858202000  |
| B  | -1.028432000 | 0.559220000  | 1.831512000  |
| H  | -1.221473000 | 0.986247000  | 2.915267000  |
| B  | 0.268522000  | 1.266912000  | 0.887197000  |
| H  | 0.998773000  | 2.096408000  | 1.292302000  |
| B  | -0.090805000 | 1.007209000  | -0.825923000 |
| H  | 0.374903000  | 1.743539000  | -1.617357000 |
| H  | -1.257876000 | -1.930546000 | 2.406550000  |
| Cl | -3.937305000 | -0.171965000 | 1.123137000  |
| Cl | -2.714934000 | 0.408325000  | -2.312365000 |
| H  | 0.358289000  | -1.168556000 | -2.113467000 |
| H  | 0.913923000  | -2.503073000 | 0.502619000  |
| Cl | -2.281132000 | -2.892096000 | -0.723600000 |

#### **TfO-CHCl<sub>2</sub>**

E (CPCM/RI-MP2/def2-TZVP): -1918.307504

E (LC- $\omega$ HPBE/def2-TZVP): -1920.1616870

|    |              |              |              |
|----|--------------|--------------|--------------|
| C  | -1.563085000 | 0.110247000  | 0.253775000  |
| H  | -1.257395000 | 0.033646000  | 1.293309000  |
| C  | 1.896891000  | 0.552077000  | 0.029547000  |
| Cl | -2.907488000 | -0.969010000 | -0.003563000 |
| Cl | -1.988566000 | 1.762323000  | -0.097918000 |
| O  | -0.502998000 | -0.265653000 | -0.600324000 |
| O  | 1.314766000  | -1.784303000 | -1.016775000 |
| O  | 0.592751000  | -1.325109000 | 1.324255000  |
| S  | 0.810738000  | -0.929597000 | -0.018035000 |
| F  | 2.030566000  | 1.062951000  | -1.180239000 |
| F  | 1.365656000  | 1.460598000  | 0.837765000  |
| F  | 3.079280000  | 0.185358000  | 0.493945000  |

#### **Cl<sub>4</sub>MeoCbCl<sub>2</sub>**

E (CPCM/RI-MP2/def2-TZVP): -3422.960162

E (LC- $\omega$ HPBE/def2-TZVP): -3426.6280310

|    |              |              |              |
|----|--------------|--------------|--------------|
| B  | -1.651418000 | -1.459458000 | -0.206024000 |
| B  | -0.015711000 | -1.565730000 | 0.416420000  |
| C  | 0.675552000  | -0.049593000 | 0.088270000  |
| I  | 2.773507000  | 0.094454000  | -0.254435000 |
| Cl | 3.120629000  | -2.303639000 | -0.099496000 |
| Cl | 2.681281000  | 2.499429000  | -0.446541000 |
| B  | -0.317101000 | -0.719818000 | -1.101299000 |
| B  | -1.850725000 | 0.153618000  | -0.945702000 |
| B  | -1.639747000 | 1.381378000  | 0.341921000  |
| Cl | -2.465063000 | 2.942738000  | 0.317541000  |
| B  | -2.482447000 | -0.155883000 | 0.693525000  |
| B  | -1.328945000 | -1.209558000 | 1.519648000  |
| C  | 0.110510000  | -0.340203000 | 1.599835000  |

|    |              |              |              |
|----|--------------|--------------|--------------|
| C  | 1.097680000  | -0.567080000 | 2.716340000  |
| H  | 1.793538000  | -1.366517000 | 2.464723000  |
| H  | 0.547771000  | -0.861619000 | 3.607634000  |
| H  | 1.650945000  | 0.343422000  | 2.939354000  |
| B  | -1.323125000 | 0.508603000  | 1.852837000  |
| H  | -1.545355000 | 0.918588000  | 2.937453000  |
| B  | -0.004735000 | 1.236714000  | 0.958977000  |
| H  | 0.697029000  | 2.063705000  | 1.411972000  |
| B  | -0.315565000 | 1.010012000  | -0.769340000 |
| H  | 0.166077000  | 1.763093000  | -1.535538000 |
| H  | -1.554232000 | -1.993806000 | 2.372696000  |
| Cl | -4.207355000 | -0.220279000 | 1.050595000  |
| Cl | -2.893332000 | 0.429634000  | -2.339583000 |
| H  | 0.182074000  | -1.140329000 | -2.084872000 |
| H  | 0.651919000  | -2.521674000 | 0.531917000  |
| Cl | -2.485600000 | -2.899005000 | -0.799678000 |

### **Cl<sub>4</sub>MeoCbl(F)(OTf)**

E (CPCM/RI-MP2/def2-TZVP): -3563.577619

E (LC- $\omega$ HPBE/def2-TZVP): -3567.5796390

|    |              |              |              |
|----|--------------|--------------|--------------|
| B  | -3.099679000 | -0.989761000 | -0.051334000 |
| B  | -1.634392000 | -1.732414000 | 0.563433000  |
| C  | -0.381376000 | -0.698726000 | 0.061187000  |
| I  | 1.502419000  | -1.576903000 | -0.269496000 |
| F  | 0.769695000  | -3.301830000 | 0.202796000  |
| O  | 2.131692000  | 0.415448000  | -0.750064000 |
| S  | 3.640852000  | 0.548371000  | -0.909908000 |
| C  | 4.082338000  | 1.328140000  | 0.691327000  |
| F  | 3.515305000  | 2.518800000  | 0.798740000  |
| F  | 3.649233000  | 0.556371000  | 1.693806000  |
| F  | 5.394517000  | 1.451237000  | 0.779928000  |
| O  | 4.212733000  | -0.765393000 | -0.875526000 |
| O  | 3.983794000  | 1.476032000  | -1.917078000 |
| B  | -1.631948000 | -0.988144000 | -1.037135000 |
| B  | -2.631384000 | 0.470932000  | -0.968155000 |
| B  | -1.840433000 | 1.608652000  | 0.168827000  |
| Cl | -1.920157000 | 3.361233000  | -0.025012000 |
| B  | -3.239643000 | 0.627306000  | 0.701370000  |
| B  | -2.601904000 | -0.734835000 | 1.631628000  |
| C  | -0.928390000 | -0.565954000 | 1.600096000  |
| C  | -0.072821000 | -1.082361000 | 2.729247000  |
| H  | 0.164327000  | -2.136164000 | 2.589371000  |
| H  | -0.631432000 | -0.980274000 | 3.657177000  |
| H  | 0.847293000  | -0.507428000 | 2.819270000  |
| B  | -1.842872000 | 0.838038000  | 1.766311000  |
| H  | -1.807020000 | 1.407141000  | 2.799975000  |
| B  | -0.391176000 | 0.835905000  | 0.783872000  |
| H  | 0.624446000  | 1.314649000  | 1.133270000  |
| B  | -0.868610000 | 0.594877000  | -0.907057000 |
| H  | -0.155938000 | 0.984256000  | -1.758995000 |
| H  | -3.090835000 | -1.254067000 | 2.572225000  |

|    |              |              |              |
|----|--------------|--------------|--------------|
| Cl | -4.801669000 | 1.349306000  | 1.078658000  |
| Cl | -3.533805000 | 1.029470000  | -2.374142000 |
| H  | -1.415457000 | -1.677594000 | -1.970651000 |
| H  | -1.421584000 | -2.866989000 | 0.773709000  |
| Cl | -4.501337000 | -1.978296000 | -0.471245000 |

**Cl<sub>4</sub>MeoCbl(Cl)(OTf)**

E (CPCM/RI-MP2/def2-TZVP): -3923.560198

E (LC- $\omega$ HPBE/def2-TZVP): -3927.8416770

|    |              |              |              |
|----|--------------|--------------|--------------|
| B  | 3.043575000  | 0.879619000  | 0.638777000  |
| B  | 1.392379000  | 1.195242000  | 1.136385000  |
| C  | 0.430979000  | 0.389113000  | -0.004100000 |
| I  | -1.440543000 | 1.310571000  | -0.397463000 |
| Cl | -0.596525000 | 3.482070000  | -0.249480000 |
| O  | -2.290614000 | -0.754949000 | -0.505075000 |
| S  | -3.772000000 | -0.714167000 | -0.804774000 |
| C  | -4.467132000 | -1.109438000 | 0.845778000  |
| F  | -4.069129000 | -2.311328000 | 1.241931000  |
| F  | -4.039417000 | -0.208660000 | 1.737536000  |
| F  | -5.786926000 | -1.075039000 | 0.801639000  |
| O  | -4.152695000 | 0.647249000  | -1.060242000 |
| O  | -4.185767000 | -1.754465000 | -1.667576000 |
| B  | 1.803802000  | 1.175980000  | -0.585741000 |
| B  | 2.986130000  | -0.106111000 | -0.857480000 |
| B  | 2.191151000  | -1.656859000 | -0.466488000 |
| Cl | 2.575682000  | -3.166585000 | -1.295540000 |
| B  | 3.295072000  | -0.889476000 | 0.714848000  |
| B  | 2.293606000  | -0.079833000 | 1.927266000  |
| C  | 0.698096000  | -0.332838000 | 1.442773000  |
| C  | -0.422780000 | -0.400624000 | 2.448467000  |
| H  | -0.726917000 | 0.594943000  | 2.767098000  |
| H  | -0.067475000 | -0.943203000 | 3.321875000  |
| H  | -1.280692000 | -0.932150000 | 2.041168000  |
| B  | 1.774506000  | -1.612179000 | 1.257230000  |
| H  | 1.635341000  | -2.559245000 | 1.947756000  |
| B  | 0.547898000  | -1.309912000 | 0.041421000  |
| H  | -0.402833000 | -1.984293000 | -0.072472000 |
| B  | 1.278666000  | -0.364304000 | -1.257619000 |
| H  | 0.784286000  | -0.408884000 | -2.328475000 |
| H  | 2.513094000  | 0.034764000  | 3.081485000  |
| Cl | 4.853123000  | -1.597206000 | 1.132424000  |
| Cl | 4.209204000  | 0.037218000  | -2.116945000 |
| H  | 1.685471000  | 2.167602000  | -1.209736000 |
| H  | 0.946155000  | 2.124307000  | 1.704874000  |
| Cl | 4.325417000  | 2.049621000  | 0.963719000  |

**Cl<sub>4</sub>MeoCbl(OTf)<sub>2</sub>**

E (CPCM/RI-MP2/def2-TZVP): -4424.150097

E (LC- $\omega$ HPBE/def2-TZVP): -4429.0448920

|   |              |              |             |
|---|--------------|--------------|-------------|
| B | -2.946110000 | -1.547551000 | 0.190386000 |
| B | -1.351357000 | -1.445386000 | 0.909993000 |

|    |              |              |              |
|----|--------------|--------------|--------------|
| C  | -0.647047000 | -0.058736000 | 0.211266000  |
| I  | 1.448896000  | 0.038387000  | -0.038876000 |
| O  | 1.507716000  | -1.906591000 | 0.759982000  |
| S  | 2.873615000  | -2.603508000 | 0.634266000  |
| C  | 2.520187000  | -3.771342000 | -0.737689000 |
| F  | 1.572963000  | -4.621830000 | -0.380184000 |
| F  | 2.110571000  | -3.085013000 | -1.802194000 |
| F  | 3.623071000  | -4.431718000 | -1.039517000 |
| O  | 3.143584000  | -3.382038000 | 1.780393000  |
| O  | 3.806977000  | -1.647817000 | 0.126556000  |
| O  | 1.107966000  | 1.969467000  | -0.792988000 |
| S  | 2.381043000  | 2.814635000  | -0.955114000 |
| C  | 2.236017000  | 3.909072000  | 0.511637000  |
| F  | 1.155860000  | 4.665979000  | 0.417809000  |
| F  | 2.139705000  | 3.157254000  | 1.612379000  |
| F  | 3.309553000  | 4.670938000  | 0.600442000  |
| O  | 3.504089000  | 1.964739000  | -0.710792000 |
| O  | 2.296733000  | 3.643991000  | -2.092543000 |
| B  | -1.564693000 | -1.054306000 | -0.799004000 |
| B  | -3.110635000 | -0.206593000 | -0.978114000 |
| B  | -2.984166000 | 1.335582000  | -0.072505000 |
| Cl | -3.813585000 | 2.809512000  | -0.575130000 |
| B  | -3.837654000 | -0.064226000 | 0.644731000  |
| B  | -2.727777000 | -0.821970000 | 1.794582000  |
| C  | -1.300481000 | 0.067560000  | 1.710957000  |
| C  | -0.381728000 | 0.181559000  | 2.900999000  |
| H  | 0.294053000  | -0.670804000 | 2.956555000  |
| H  | -0.988570000 | 0.191785000  | 3.803848000  |
| H  | 0.193235000  | 1.105539000  | 2.866945000  |
| B  | -2.753155000 | 0.920565000  | 1.636958000  |
| H  | -3.040522000 | 1.609133000  | 2.551644000  |
| B  | -1.389095000 | 1.404654000  | 0.652473000  |
| H  | -0.721493000 | 2.339251000  | 0.901647000  |
| B  | -1.594596000 | 0.700211000  | -0.963306000 |
| H  | -1.072555000 | 1.219666000  | -1.881691000 |
| H  | -2.996527000 | -1.343182000 | 2.818875000  |
| Cl | -5.578530000 | -0.065473000 | 0.908634000  |
| Cl | -4.066785000 | -0.351207000 | -2.449641000 |
| H  | -1.003379000 | -1.717128000 | -1.598717000 |
| H  | -0.690897000 | -2.318874000 | 1.325586000  |
| Cl | -3.732093000 | -3.112596000 | -0.028462000 |

#### TfO-CH<sub>2</sub>Cl

E (CPCM/RI-MP2/def2-TZVP): -1459.208031

E (LC- $\omega$ HPBE/def2-TZVP): -1460.6849010

|    |              |              |              |
|----|--------------|--------------|--------------|
| C  | 1.727158000  | -0.934180000 | -0.023884000 |
| H  | 1.416747000  | -1.104366000 | 1.003282000  |
| C  | -1.732318000 | -0.409361000 | -0.006934000 |
| Cl | 3.261137000  | -0.100053000 | -0.011806000 |
| H  | 1.839299000  | -1.863790000 | -0.573073000 |
| O  | 0.748305000  | -0.180018000 | -0.725510000 |

|   |              |              |              |
|---|--------------|--------------|--------------|
| O | -0.587215000 | 1.824383000  | -0.761979000 |
| O | 0.093211000  | 0.821938000  | 1.415751000  |
| S | -0.282577000 | 0.716494000  | 0.053994000  |
| F | -2.092233000 | -0.634423000 | -1.258623000 |
| F | -1.415902000 | -1.565920000 | 0.570565000  |
| F | -2.733819000 | 0.148786000  | 0.650881000  |

#### TMSOTf

E (CPCM/RI-MP2/def2-TZVP): -1368.876235

E (LC- $\omega$ HPBE/def2-TZVP): -1370.5325810

|    |              |              |              |
|----|--------------|--------------|--------------|
| S  | -0.766115000 | 0.833965000  | 0.040864000  |
| O  | -0.512279000 | 1.165724000  | -1.318328000 |
| O  | -1.263237000 | 1.793177000  | 0.953987000  |
| O  | 0.430293000  | 0.094163000  | 0.648816000  |
| C  | -1.976067000 | -0.544689000 | 0.027189000  |
| Si | 2.018372000  | -0.194088000 | 0.018720000  |
| F  | -3.115759000 | -0.107163000 | -0.486299000 |
| F  | -2.190410000 | -0.987061000 | 1.257724000  |
| F  | -1.519999000 | -1.547365000 | -0.717675000 |
| C  | 2.768633000  | 1.454504000  | -0.347339000 |
| H  | 2.770800000  | 2.092654000  | 0.537383000  |
| H  | 3.803016000  | 1.329224000  | -0.674403000 |
| H  | 2.221589000  | 1.965155000  | -1.140296000 |
| C  | 1.854966000  | -1.262704000 | -1.479437000 |
| H  | 1.365535000  | -2.208070000 | -1.242810000 |
| H  | 1.279462000  | -0.760326000 | -2.257002000 |
| H  | 2.845655000  | -1.487743000 | -1.880474000 |
| C  | 2.833371000  | -1.060362000 | 1.433216000  |
| H  | 2.313616000  | -1.987315000 | 1.678348000  |
| H  | 3.865419000  | -1.309763000 | 1.178543000  |
| H  | 2.847433000  | -0.430734000 | 2.323498000  |

#### TMSF

E (CPCM/RI-MP2/def2-TZVP): -508.3137316

E (LC- $\omega$ HPBE/def2-TZVP): -509.0675320

|    |              |              |              |
|----|--------------|--------------|--------------|
| F  | 0.000005000  | -0.000057000 | 1.642248000  |
| Si | 0.000041000  | -0.000103000 | 0.025367000  |
| C  | -1.408279000 | -1.076165000 | -0.521795000 |
| H  | -2.359597000 | -0.693229000 | -0.149362000 |
| H  | -1.465017000 | -1.116101000 | -1.611531000 |
| H  | -1.286895000 | -2.096030000 | -0.153762000 |
| C  | 1.636262000  | -0.681305000 | -0.521800000 |
| H  | 2.458465000  | -0.067297000 | -0.151232000 |
| H  | 1.779818000  | -1.697640000 | -0.151975000 |
| H  | 1.700368000  | -0.707477000 | -1.611545000 |
| C  | -0.228018000 | 1.757581000  | -0.521705000 |
| H  | 0.579160000  | 2.390239000  | -0.149507000 |
| H  | -0.234738000 | 1.826890000  | -1.611427000 |
| H  | -1.171970000 | 2.161937000  | -0.153221000 |

**TMSCI**

E (CPCM/RI-MP2/def2-TZVP): -868.2650381

E (LC- $\omega$ HPBE/def2-TZVP): -869.3081380

|    |              |              |              |
|----|--------------|--------------|--------------|
| Cl | -1.738991000 | -0.000033000 | 0.000035000  |
| Si | 0.331658000  | 0.000040000  | -0.000019000 |
| C  | 0.883951000  | -1.076413000 | -1.407796000 |
| H  | 0.513165000  | -0.693299000 | -2.359206000 |
| H  | 1.974472000  | -1.112134000 | -1.456352000 |
| H  | 0.515051000  | -2.095510000 | -1.286133000 |
| C  | 0.884031000  | -0.681014000 | 1.636042000  |
| H  | 0.514259000  | -0.066895000 | 2.457972000  |
| H  | 0.514189000  | -1.696958000 | 1.779293000  |
| H  | 1.974557000  | -0.704200000 | 1.691596000  |
| C  | 0.883912000  | 1.757450000  | -0.228287000 |
| H  | 0.513168000  | 2.389723000  | 0.579313000  |
| H  | 1.974435000  | 1.817348000  | -0.234957000 |
| H  | 0.514976000  | 2.161790000  | -1.171601000 |

**CIF**

E (CPCM/RI-MP2/def2-TZVP): -559.3419953

E (LC- $\omega$ HPBE/def2-TZVP): -559.8359990

|    |             |             |              |
|----|-------------|-------------|--------------|
| Cl | 0.000000000 | 0.000000000 | 0.558238000  |
| F  | 0.000000000 | 0.000000000 | -1.054450000 |

**Cl<sub>4</sub>MeoCbI(Cl)(F)**

E (CPCM/RI-MP2/def2-TZVP): -3062.979518

E (LC- $\omega$ HPBE/def2-TZVP): -3066.3679160

|    |              |              |              |
|----|--------------|--------------|--------------|
| B  | 1.446991000  | 1.483288000  | -0.080585000 |
| B  | -0.196119000 | 1.425871000  | 0.530461000  |
| C  | -0.780263000 | -0.094670000 | 0.065191000  |
| I  | -2.837386000 | -0.393043000 | -0.323517000 |
| Cl | -3.373769000 | 1.928029000  | -0.081026000 |
| F  | -2.402312000 | -2.304924000 | -0.520763000 |
| B  | 0.171138000  | 0.737252000  | -1.051192000 |
| B  | 1.757446000  | -0.043568000 | -0.955101000 |
| B  | 1.621848000  | -1.389936000 | 0.218549000  |
| Cl | 2.552785000  | -2.883778000 | 0.069635000  |
| B  | 2.358115000  | 0.163863000  | 0.711634000  |
| B  | 1.132758000  | 1.063167000  | 1.613211000  |
| C  | -0.245002000 | 0.096360000  | 1.601432000  |
| C  | -1.251792000 | 0.160242000  | 2.721554000  |
| H  | -2.003775000 | 0.923837000  | 2.526462000  |
| H  | -0.730313000 | 0.422287000  | 3.639678000  |
| H  | -1.737682000 | -0.803091000 | 2.864955000  |
| B  | 1.239450000  | -0.674631000 | 1.795692000  |
| H  | 1.484146000  | -1.160853000 | 2.843411000  |
| B  | -0.022670000 | -1.410350000 | 0.827632000  |
| H  | -0.671677000 | -2.317745000 | 1.197079000  |
| B  | 0.281205000  | -1.012770000 | -0.871040000 |
| H  | -0.153106000 | -1.726617000 | -1.701094000 |
| H  | 1.302089000  | 1.782491000  | 2.533834000  |

|    |              |              |              |
|----|--------------|--------------|--------------|
| Cl | 4.073281000  | 0.310237000  | 1.092471000  |
| Cl | 2.825040000  | -0.125583000 | -2.355536000 |
| H  | -0.350247000 | 1.208738000  | -1.999555000 |
| H  | -0.932175000 | 2.318724000  | 0.720544000  |
| Cl | 2.187752000  | 3.020817000  | -0.538333000 |

**C<sub>3</sub>H<sub>6</sub>**

E (CPCM/RI-MP2/def2-TZVP): -117.611286

E (LC- $\omega$ HPBE/def2-TZVP): -117.8674020

|   |              |              |              |
|---|--------------|--------------|--------------|
| C | -1.225025000 | -0.161400000 | 0.000002000  |
| C | 0.134488000  | 0.452621000  | 0.000026000  |
| C | 1.269710000  | -0.220616000 | 0.000020000  |
| H | 2.227994000  | 0.284659000  | -0.000103000 |
| H | 1.283608000  | -1.305783000 | -0.000045000 |
| H | 0.170195000  | 1.539681000  | -0.000043000 |
| H | -1.793989000 | 0.153990000  | 0.877396000  |
| H | -1.793878000 | 0.153839000  | -0.877582000 |
| H | -1.168972000 | -1.250015000 | 0.000087000  |

**C<sub>3</sub>H<sub>8</sub>**

E (CPCM/RI-MP2/def2-TZVP): -118.8296337

E (LC- $\omega$ HPBE/def2-TZVP): -119.1125200

|   |              |              |              |
|---|--------------|--------------|--------------|
| C | 0.000000000  | 1.262316000  | -0.258363000 |
| C | 0.000000000  | 0.000000000  | 0.584491000  |
| C | 0.000000000  | -1.262316000 | -0.258363000 |
| H | 0.880663000  | -1.302790000 | -0.903025000 |
| H | 0.000000000  | -2.160241000 | 0.360875000  |
| H | -0.880663000 | -1.302790000 | -0.903025000 |
| H | 0.873562000  | 0.000000000  | 1.241884000  |
| H | -0.873562000 | 0.000000000  | 1.241884000  |
| H | 0.880663000  | 1.302790000  | -0.903025000 |
| H | -0.880663000 | 1.302790000  | -0.903025000 |
| H | 0.000000000  | 2.160241000  | 0.360875000  |

**Cl<sub>4</sub>MeoCbl(C<sub>3</sub>H<sub>7</sub>)(OTf)**

E (CPCM/RI-MP2/def2-TZVP): -3582.128684

E (LC- $\omega$ HPBE/def2-TZVP): -3586.2802040

|   |              |              |              |
|---|--------------|--------------|--------------|
| B | -2.865103000 | -1.671645000 | 0.034124000  |
| B | -1.306802000 | -1.364514000 | 0.792069000  |
| C | -0.828081000 | 0.157431000  | 0.233918000  |
| I | 1.300845000  | 0.351494000  | 0.145543000  |
| O | 3.672374000  | -1.146600000 | 1.416823000  |
| S | 4.473743000  | -0.229117000 | 0.656438000  |
| C | 5.103837000  | -1.214824000 | -0.754515000 |
| F | 5.879261000  | -2.197847000 | -0.319893000 |
| F | 4.079646000  | -1.745832000 | -1.430552000 |
| F | 5.801662000  | -0.450472000 | -1.588408000 |
| O | 5.617019000  | 0.363570000  | 1.255144000  |
| O | 3.605563000  | 0.759325000  | -0.052036000 |
| C | 1.270545000  | 2.368084000  | -0.649756000 |
| C | 1.874433000  | 2.358808000  | -2.031288000 |

|    |              |              |              |
|----|--------------|--------------|--------------|
| H  | 1.338985000  | 1.696059000  | -2.709837000 |
| H  | 1.804869000  | 3.374910000  | -2.426046000 |
| H  | 2.924806000  | 2.075622000  | -2.001772000 |
| C  | 1.941216000  | 3.300017000  | 0.327238000  |
| H  | 2.993176000  | 3.052227000  | 0.453857000  |
| H  | 1.873319000  | 4.309242000  | -0.085082000 |
| H  | 1.450470000  | 3.301127000  | 1.299824000  |
| H  | 0.196275000  | 2.539535000  | -0.689350000 |
| B  | -1.574204000 | -0.876956000 | -0.874090000 |
| B  | -3.229159000 | -0.274448000 | -1.023140000 |
| B  | -3.357331000 | 1.182886000  | 0.010554000  |
| Cl | -4.401471000 | 2.551879000  | -0.390302000 |
| B  | -3.987023000 | -0.391150000 | 0.588109000  |
| B  | -2.781932000 | -1.063503000 | 1.695949000  |
| C  | -1.519331000 | 0.048414000  | 1.718466000  |
| C  | -0.663333000 | 0.204013000  | 2.951608000  |
| H  | 0.109550000  | -0.560989000 | 2.999732000  |
| H  | -1.301394000 | 0.098346000  | 3.826487000  |
| H  | -0.196119000 | 1.186178000  | 2.987035000  |
| B  | -3.084609000 | 0.665609000  | 1.681966000  |
| H  | -3.492994000 | 1.213669000  | 2.644760000  |
| B  | -1.794439000 | 1.431994000  | 0.773734000  |
| H  | -1.280909000 | 2.442908000  | 1.104410000  |
| B  | -1.871146000 | 0.850237000  | -0.886849000 |
| H  | -1.434788000 | 1.526885000  | -1.752085000 |
| H  | -2.984283000 | -1.699976000 | 2.669414000  |
| Cl | -5.711565000 | -0.684541000 | 0.805313000  |
| Cl | -4.137633000 | -0.437805000 | -2.525449000 |
| H  | -0.910929000 | -1.375935000 | -1.714231000 |
| H  | -0.469201000 | -2.125867000 | 1.130460000  |
| Cl | -3.394464000 | -3.315090000 | -0.336638000 |

#### 4-NO<sub>2</sub>PhI

E (CPCM/RI-MP2/def2-TZVP): -732.518196

E (LC- $\omega$ HPBE/def2-TZVP): -733.753166

|   |                 |                 |                 |
|---|-----------------|-----------------|-----------------|
| I | -2.505387000000 | 0.000000000000  | -0.000001000000 |
| O | 4.318845000000  | 1.070376000000  | 0.000358000000  |
| N | 3.761756000000  | 0.000000000000  | 0.000009000000  |
| C | -0.438349000000 | 0.000000000000  | 0.000002000000  |
| C | 0.245688000000  | 1.203831000000  | -0.000151000000 |
| H | -0.295679000000 | 2.140855000000  | -0.000294000000 |
| C | 1.625511000000  | 1.206207000000  | -0.000127000000 |
| H | 2.188399000000  | 2.129375000000  | -0.000201000000 |
| C | 2.290323000000  | 0.000000000000  | 0.000006000000  |
| O | 4.318845000000  | -1.070376000000 | -0.000376000000 |
| C | 0.245688000000  | -1.203831000000 | 0.000157000000  |
| H | -0.295679000000 | -2.140855000000 | 0.000298000000  |
| C | 1.625511000000  | -1.206207000000 | 0.000138000000  |
| H | 2.188399000000  | -2.129375000000 | 0.000212000000  |

**4-NO<sub>2</sub>Ph-ICl<sub>2</sub>**

E (CPCM/RI-MP2/def2-TZVP): -1651.887523

E (LC-ωHPBE/def2-TZVP): -1653.890728

|    |                 |                 |                 |
|----|-----------------|-----------------|-----------------|
| I  | -1.952386000000 | -0.000002000000 | -0.000016000000 |
| Cl | -1.874839000000 | -2.392630000000 | 0.435096000000  |
| O  | 4.860167000000  | -0.808271000000 | -0.702535000000 |
| N  | 4.306741000000  | 0.000005000000  | -0.000003000000 |
| C  | 0.132610000000  | -0.000004000000 | -0.000009000000 |
| C  | 0.791627000000  | -0.926419000000 | -0.779386000000 |
| H  | 0.246495000000  | -1.653381000000 | -1.366277000000 |
| C  | 2.171923000000  | -0.923074000000 | -0.780530000000 |
| H  | 2.736655000000  | -1.624727000000 | -1.378393000000 |
| C  | 2.831089000000  | 0.000001000000  | -0.000005000000 |
| Cl | -1.874829000000 | 2.392641000000  | -0.435038000000 |
| O  | 4.860160000000  | 0.808263000000  | 0.702556000000  |
| C  | 0.791621000000  | 0.926416000000  | 0.779369000000  |
| H  | 0.246485000000  | 1.653377000000  | 1.366257000000  |
| C  | 2.171917000000  | 0.923075000000  | 0.780518000000  |
| H  | 2.736645000000  | 1.624730000000  | 1.378382000000  |

**4-NO<sub>2</sub>Ph-I(OTf)<sub>2</sub>**

E (CPCM/RI-MP2/def2-TZVP): -2653.083021

E (LC-ωHPBE/def2-TZVP): -2656.310656

|   |                 |                 |                 |
|---|-----------------|-----------------|-----------------|
| I | 0.671819000000  | -0.834404000000 | -0.702887000000 |
| S | 3.122847000000  | 0.942997000000  | 0.333307000000  |
| S | -1.780753000000 | -2.521714000000 | 0.492852000000  |
| O | 2.306817000000  | 0.457923000000  | -0.875280000000 |
| F | 4.074660000000  | -1.475357000000 | 0.273170000000  |
| O | 3.638569000000  | 2.235032000000  | 0.081310000000  |
| F | 5.337826000000  | -0.029376000000 | 1.272063000000  |
| O | -1.064174000000 | -2.000457000000 | -0.762974000000 |
| O | -3.373627000000 | 4.707520000000  | -0.775667000000 |
| F | 5.211077000000  | -0.047743000000 | -0.884951000000 |
| O | -1.338040000000 | -1.800952000000 | 1.639654000000  |
| O | 2.436526000000  | 0.632843000000  | 1.542777000000  |
| O | -3.060700000000 | 4.555818000000  | 1.338814000000  |
| F | -4.277534000000 | -2.286886000000 | 1.122165000000  |
| N | -2.900354000000 | 4.188527000000  | 0.203431000000  |
| C | -0.506321000000 | 0.829083000000  | -0.395012000000 |
| O | -1.838499000000 | -3.935132000000 | 0.489197000000  |
| F | -3.922157000000 | -2.470997000000 | -1.001910000000 |
| C | -2.049822000000 | 2.997114000000  | -0.008645000000 |
| C | -1.495830000000 | 2.382447000000  | 1.090804000000  |
| H | -1.685977000000 | 2.772756000000  | 2.080791000000  |
| C | -1.851817000000 | 2.557651000000  | -1.299334000000 |
| H | -2.312099000000 | 3.082762000000  | -2.124500000000 |
| C | -0.703041000000 | 1.267669000000  | 0.898585000000  |
| H | -0.252831000000 | 0.757995000000  | 1.739030000000  |
| F | -3.493398000000 | -0.609601000000 | 0.006853000000  |
| C | -1.060199000000 | 1.446709000000  | -1.500236000000 |
| H | -0.883775000000 | 1.075527000000  | -2.501260000000 |

|   |                 |                 |                |
|---|-----------------|-----------------|----------------|
| C | -3.481483000000 | -1.935239000000 | 0.125440000000 |
| C | 4.536269000000  | -0.223261000000 | 0.239598000000 |

**4-NO<sub>2</sub>Ph-I(Cl)(OTf)**

E (CPCM/RI-MP2/def2-TZVP): 2152.489299

E (LC-ωHPBE/def2-TZVP): -2155.105283

|    |                 |                 |                 |
|----|-----------------|-----------------|-----------------|
| I  | 0.492300000000  | 1.454801000000  | 0.012167000000  |
| S  | 2.693291000000  | -0.656784000000 | 0.860087000000  |
| Cl | -0.580317000000 | 3.392764000000  | -0.787106000000 |
| O  | 1.191806000000  | -0.505974000000 | 0.777579000000  |
| F  | 2.405144000000  | -2.881309000000 | -0.484156000000 |
| F  | 4.306342000000  | -1.893939000000 | -0.768861000000 |
| F  | 2.522990000000  | -1.102408000000 | -1.703719000000 |
| O  | -5.849639000000 | -1.137144000000 | 0.699306000000  |
| O  | 3.096435000000  | -1.423897000000 | 1.979360000000  |
| O  | 3.314526000000  | 0.601426000000  | 0.570898000000  |
| N  | -4.953377000000 | -1.611717000000 | 0.048365000000  |
| O  | -5.019540000000 | -2.625492000000 | -0.599283000000 |
| C  | -1.315698000000 | 0.434478000000  | 0.029919000000  |
| C  | -2.619507000000 | -1.412644000000 | -0.682676000000 |
| H  | -2.752903000000 | -2.334463000000 | -1.231560000000 |
| C  | -3.665478000000 | -0.888610000000 | 0.043151000000  |
| C  | -2.362448000000 | 0.957175000000  | 0.760119000000  |
| H  | -2.255924000000 | 1.881659000000  | 1.312599000000  |
| C  | -3.564959000000 | 0.280011000000  | 0.764431000000  |
| H  | -4.416961000000 | 0.644408000000  | 1.321259000000  |
| C  | -1.416108000000 | -0.736427000000 | -0.692086000000 |
| H  | -0.573540000000 | -1.128620000000 | -1.245835000000 |
| C  | 3.006663000000  | -1.705032000000 | -0.611647000000 |

## References

- [1] C. P. Rosenau, B. J. Jeliet, A. D. Gossert, A. Togni, "Exposing the Origins of Irreproducibility in Fluorine NMR Spectroscopy" *Angew. Chemie - Int. Ed.* **2018**, *57*, 9528–9533.
- [2] R. D. Chapman, J. L. Andreshak, S. P. Herrlinger, S. A. Shackelford, R. A. Hildreth, J. P. Smith, "Trifluoromethanesulfonate Esters from Dibromoalkane Metatheses with Silver Triflate: Mechanistic and Synthetic Aspects" *J. Org. Chem.* **1986**, *51*, 3792–3798.
- [3] V. A. Petrov, "A new route to polyfluorinated trifluoromethanesulfonates. Synthesis of perfluoroallyl and perfluorobenzyl triflates" *J. Fluor. Chem.* **1995**, *73*, 17–19.
- [4] A. Hermannsdorfer, M. Driess, "Silicon Tetrakis(trifluoromethanesulfonate): A Simple Neutral Silane Acting as a Soft and Hard Lewis Superacid" *Angew. Chemie - Int. Ed.* **2021**, *60*, 13656–13660.
- [5] M. Sceney, K. F. White, J. L. Dutton, "Ortho-Carborane-Supported Hypervalent Iodine(III) Reagents: A Scaffold for Enhanced Oxidative Capability" *J. Am. Chem. Soc.* **2025**, *147*, 32347–32351.
- [6] R. Streubel, A. Özbolat-Schön, M. Bode, J. Daniels, G. Schnakenburg, F. Teixidor, C. Vinas, A. Vaca, A. Pepiol, P. Farras, "Investigations on the reactivity of Li/Cl phosphinidenoid tungsten complexes toward various iodine compounds" *Organometallics* **2009**, *28*, 6031–6035.
- [7] B. A. Chalmers, M. Bühl, K. S. Athukorala Arachchige, A. M. Z. Slawin, P. Kilian, "Structural, spectroscopic and computational examination of the dative interaction in constrained phosphine-stibines and phosphine-stiboranes" *Chem. - A Eur. J.* **2015**, *21*, 7520–7531.
- [8] A. P. M. Robertson, N. Burford, R. McDonald, M. J. Ferguson, "Coordination complexes of Ph<sub>3</sub>Sb<sup>2+</sup> and Ph<sub>3</sub>Bi<sup>2+</sup>: Beyond pnictonium cations" *Angew. Chemie - Int. Ed.* **2014**, *53*, 3480–3483.
- [9] AIST, "SDBS No.:1494 p-bromochlorobenzene," **1999**.
- [10] AIST, "SDBS No.:2011 o-bromochlorobenzene," **1999**.
- [11] M. J. Frisch, G. W. Trucks, H. B. Schlegel, G. E. Scuseria, M. A. Robb, J. R. Cheeseman, G. Scalmani, V. Barone, G. A. Petersson, H. Nakatsuji, X. Li, M. Caricato, A. V. Marenich, J. Bloino, B. G. Janesko, R. Gomperts, B. Mennucci, H. P. Hratchian, J. V. Ortiz, A. F. Izmaylov, J. L. Sonnenberg, D. Williams-Young, F. Ding, F. Lipparini, F. Egidi, J. Goings, B. Peng, A. Petrone, T. Henderson, D. Ranasinghe, V. G. Zakrzewski, N. Gao, J.; Rega, G. Zheng, W. Liang, M. Hada, M. Ehara, K. Toyota, R. Fukuda, J. Hasegawa, M. Ishida, T. Nakajima, Y. Honda, O. Kitao, H. Nakai, T. Vreven, K. Throssell, J. A. Montgomery Jr., J. E. Peralta, F. Ogliaro, M. J. Bearpark, J. J. Heyd, E. N. Brothers, K. N. Kudin, V. N. Staroverov, T. A. Keith, R. Kobayashi, J. Normand, K. Raghavachari, A. P. Rendell, J. C. Burant, S. S. Iyengar, J. Tomasi, M. Cossi, J. M. Millam, M. Klene, C. Adamo, R. Cammi, J. W. Ochterski, R. L. Martin, K. Morokuma, O. Farkas, J. B. Foresman, D. J. Fox, **2016**.
- [12] O. A. Vydrov, G. E. Scuseria, "Assessment of a long-range corrected hybrid functional" *J. Chem. Phys.* **2006**, *125*, 234109.
- [13] F. Weigend, R. Ahlrichs, "Balanced basis sets of split valence, triple zeta valence and quadruple zeta valence quality for H to Rn: Design and assessment of accuracy" *Phys. Chem. Chem. Phys.* **2005**, *7*, 3297–3305.
- [14] F. Neese, "The ORCA program system" *WIREs Comput. Mol. Sci.* **2012**, *2*, 73–78.
- [15] M. Feyereisen, G. Fitzgerald, A. Komornicki, "Use of approximate integrals in ab initio theory. An application in MP2 energy calculations" *Chem. Phys. Lett.* **1993**, *208*, 359–363.
- [16] V. Barone, M. Cossi, "Quantum Calculation of Molecular Energies and Energy Gradients in Solution by a Conductor Solvent Model" *J. Phys. Chem. A* **1998**, *102*, 1995–2001.
- [17] F. Weigend, "Accurate Coulomb-fitting basis sets for H to Rn" *Phys. Chem. Chem. Phys.* **2006**, *8*, 1057–1065.
- [18] A. Hellweg, C. Hättig, S. Höfener, W. Klopper, "Optimized accurate auxiliary basis sets for RI-MP2 and RI-CC2 calculations for the atoms Rb to Rn" *Theor. Chem. Acc.* **2007**, *117*, 587–597.
